# Supplementary material for: Base- and metal-free visible-light driven site-selective α-C(sp3)–H functionalization reaction of glycine derivatives with hydroxamic acid derivatives
Source: Royal Society of Chemistry journal article supplement (doi:10.1039/d4qo00425f), 2024-01-01

## Supporting Information

Base- and metal-free visible-light driven site-selective  $\alpha$ -C(sp<sup>3</sup>)-H functionalization  
reaction of glycine derivatives with hydroxamic acid derivatives

Shiyun He,<sup>a</sup> Hongying Fan,<sup>a</sup> Xue Zhang,<sup>a</sup> Meiling Ye,<sup>a</sup> Jian Chen,<sup>a</sup> Jinyu Hou,<sup>a</sup> Tianle Huang,<sup>a</sup> Li Guo,<sup>a</sup> Guanghui Lv<sup>\*b</sup> and Yong Wu<sup>\*a</sup>

<sup>a</sup>Key Laboratory of Drug-Targeting and Drug Delivery System of the Education Ministry and Department of Medicinal Chemistry, Sichuan Engineering Laboratory for Plant-Sourced Drug and Sichuan Research Center for Drug Precision Industrial Technology, West China School of Pharmacy, Sichuan University, No. 17 Southern Renmin Road, Chengdu, Sichuan 610041, People's Republic of China. E-mail: wyong@scu.edu.cn

<sup>b</sup>Department of Pharmacy, Hubei Provincial Clinical Research Center for Umbilical Cord Blood \ Hematopoietic Stem Cells, Taihe Hospital, Hubei University of Medicine, Shiyan 442000, Hubei, China. E-mail: 1083947919@qq.com

## Table of contents

|                                             |    |
|---------------------------------------------|----|
| 1. General Information .....                | 3  |
| 2. Starting Materials .....                 | 4  |
| 3. Optimization of Reaction conditions..... | 6  |
| 4. Scale-up preparation.....                | 8  |
| 5. Compatibility with biomolecules .....    | 9  |
| 6. The mechanistic studies.....             | 10 |
| 7. References .....                         | 11 |
| 8. Characterization of Products .....       | 11 |
| 9. NMR Spectra.....                         | 23 |

## 1. General Information

Unless otherwise specified, materials were purchased from commercial suppliers and used without further purification. All manipulations were performed in a dried sealed tube equipped with a magnetic stir bar under a nitrogen atmosphere. Except for the specially mentioned dry solvent, all the solvents were treated according to general methods. All the reactions were monitored by TLC and were visualized using UV light. The product purification was done using silica gel column chromatography. TLC characterization was performed with precoated silica gel GF254 (0.2 mm), while column chromatography characterization was performed with silica gel (100–200 mesh).  $^1\text{H}$  NMR and  $^{13}\text{C}$  NMR spectra were recorded with tetramethylsilane (TMS,  $\delta = 0.00$  ppm) as the internal standard.  $^1\text{H}$  NMR spectra were recorded at 400 or 600 MHz (Varian), and  $^{13}\text{C}$  NMR spectra were recorded at 100 or 150 MHz (Varian).  $^{19}\text{F}$  NMR spectra were recorded at 376 MHz. Chemical shifts are reported in ppm downfield from  $\text{CDCl}_3$  ( $\delta = 7.26$  ppm) for  $^1\text{H}$  NMR, and chemical shifts for  $^{13}\text{C}$  NMR spectra are reported in ppm relative to the central  $\text{CDCl}_3$  ( $\delta = 77.0$  ppm) Coupling constants were given in Hz. The following notations were used: br-broad, s-singlet, d-doublet, t-triplet, q-quartet, m-multiplet, dd-doublet of doublet, dt-doublet of triplet, td-triplet of doublet, and ddd-doublet of doublet of doublet. Melting points were measured with a YRT-3 melting point apparatus (Shantou Keyi Instrument & Equipment Co., Ltd., Shantou, China). The blue light source (455nm) was provided by Shanghai 3S Technology Co., Ltd SSSTECH-LAL1CV 1.0 parallel reactor (Figure S1). The volume of the reaction tube is 10 ml.

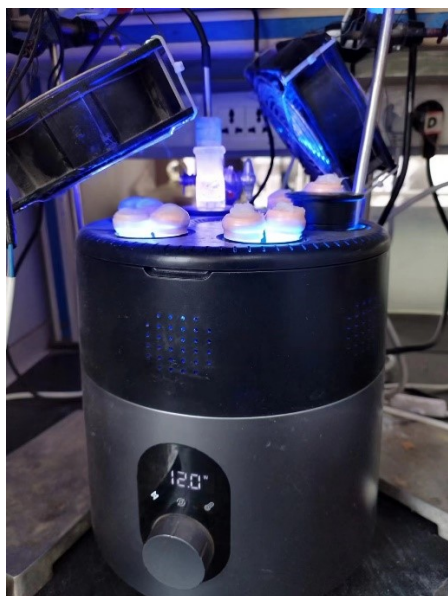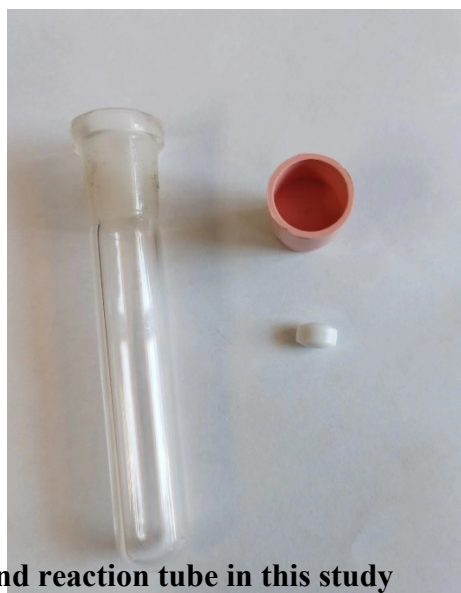

**Figure S1. Photoreactor and reaction tube in this study**

## 2. Starting Materials

### N-aryl protected derivatives

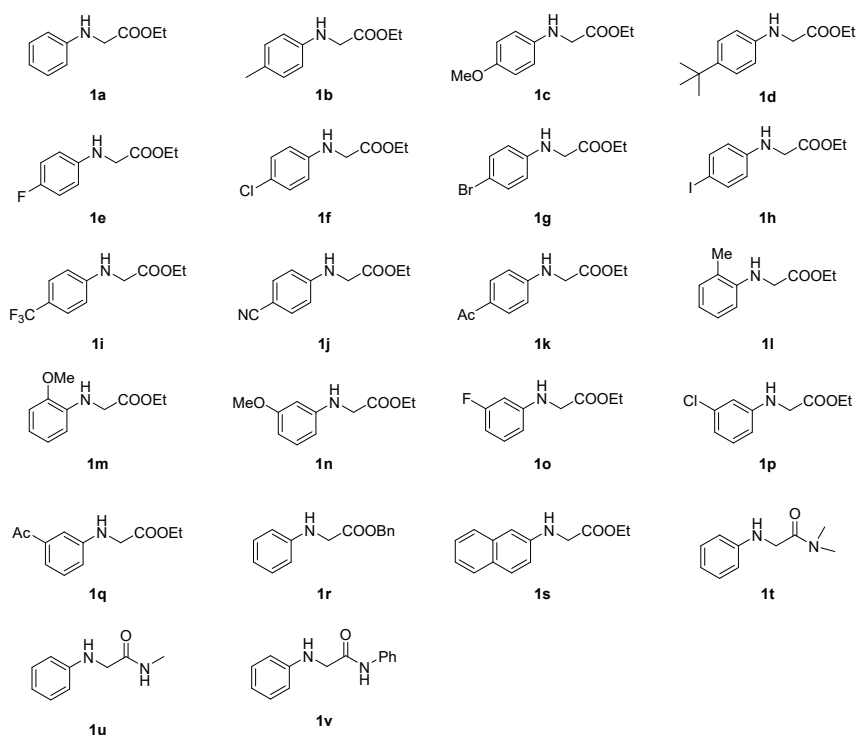

### Peptides

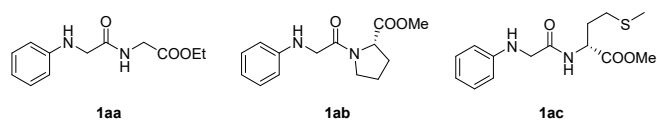

### Hydroxamide

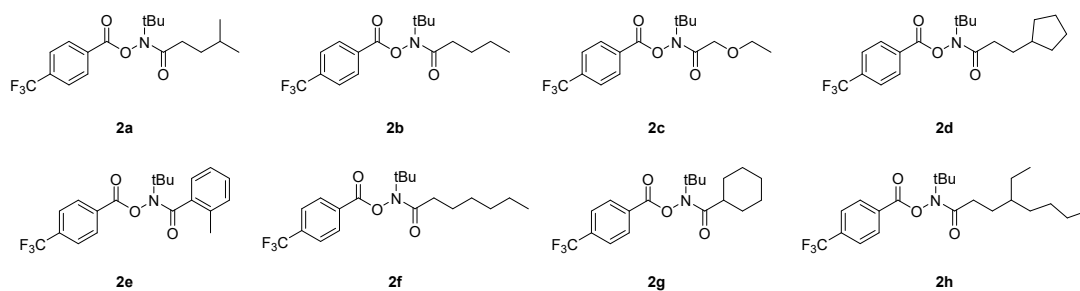

### 2.1 Preparation of Glycine Derivatives 1

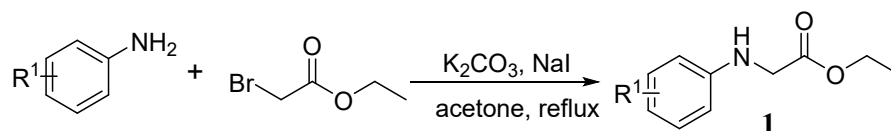

Following the literature procedure:<sup>1</sup>a mixture of aniline (10 mmol), the corresponding bromoacetate-ester (1.1 equiv), potassium carbonate anhydrous (1.2 equiv) and sodium iodide (1.2 equiv) in 30 mL of dry acetone was refluxed for 12 h. The resulting mixture was cooled to room temperature, and filtered through a celite. The celite was washed with CH<sub>2</sub>Cl<sub>2</sub>, the combined organic layer was evaporated to

remove the solvent and the crude product was then purified by column chromatography. The pure product was obtained as solid or liquid.

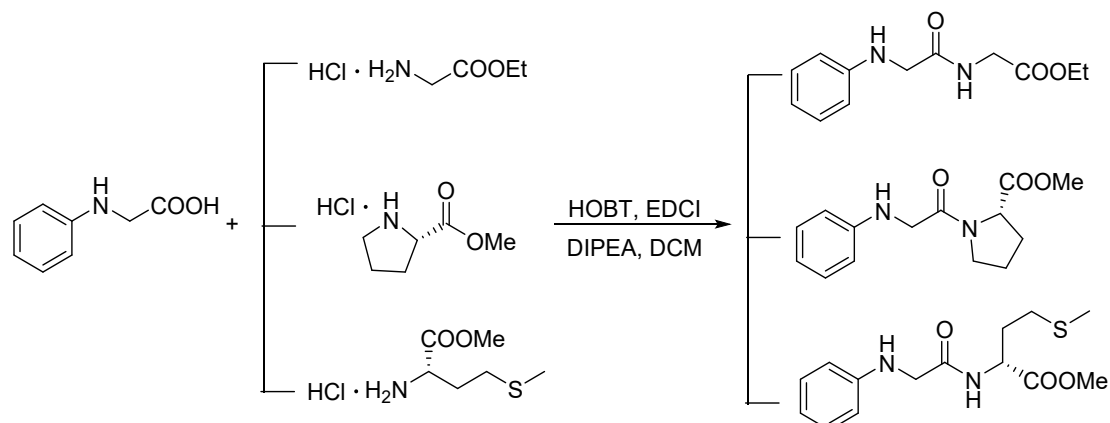

Following the literature procedure<sup>2</sup>: In round-bottom flask, phenylglycine (1.0 equiv) were dissolved in DCM (0.33 M), HOBT (1.45 equiv) and EDCI (1.6 equiv) were added in turn. The mixture was stirred at room temperature. After 30 min, DIEA (4.0 equiv) and ester-protected amino acids (1.0 equiv) were added at 0°C. The reaction mixture was warmed to room temperature and stirred overnight. The resulting mixture was washed by citric acid solution, saturated sodium bicarbonate solution and brine. The organic layer was dried over Na<sub>2</sub>SO<sub>4</sub> and concentrated in vacuo. The residue was purified by column chromatography and the title compounds were obtained.

## 2.2 Preparation of hydroxamide compounds 2

Hydroxamide compounds **2** are known compounds, and they were synthesized according to the literature procedure<sup>3</sup>

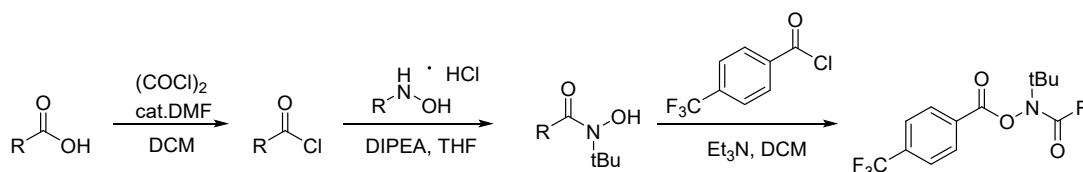

### Step 1:

To a solution of carboxylic acid (1.0 equiv.) and 3-5 drops of anhydrous DMF in anhydrous CH<sub>2</sub>Cl<sub>2</sub> (0.5 M) at 0 °C, oxalyl chloride (1.5 equiv.) was added dropwise over 10 minutes. The reaction was vigorously stirred at room temperature for 3 h. The solvent was removed in vacuum. Anhydrous CH<sub>2</sub>Cl<sub>2</sub> was added to remove the residual of oxalyl chloride in vacuum. Then the resulting acyl chloride was redissolved in anhydrous acetonitrile and used directly for the next step without further purification.

### Step 2:

A solution of the N-(tert-butyl)hydroxylamine hydrochloride in anhydrous THF (0.4 M) was cooled to 0 °C, treated with DIPEA (2.0 equiv.) and stirred for 15 minutes. The acyl chloride (1.0 equiv.) in anhydrous acetonitrile was added dropwise over 15 minutes and the mixture was allowed to warm to room temperature overnight. The mixture was diluted with saturated NaHCO<sub>3</sub> and EtOAc and the layers were separated. The aqueous layer was extracted twice with EtOAc and the combined organic layers

were washed with 1 M HCl, saturated NaHCO<sub>3</sub> and brine, successively, and then evaporated. Purification by column chromatography on silica gel eluting with petroleum ether and EtOAc gave the hydroxylamine.

### Step 3:

To a solution of hydroxylamine (1.1 equiv.) in anhydrous CH<sub>2</sub>Cl<sub>2</sub> (0.35 M) at 0 °C, Et<sub>3</sub>N (1.5 equiv.) was added dropwise. 4-trifluoromethyl-benzoyl chloride (1.0 equiv.) was then added dropwise over 5 minutes. The reaction was vigorously stirred at room temperature for 2 h. The mixture was diluted with saturated NaHCO<sub>3</sub> and CH<sub>2</sub>Cl<sub>2</sub> and the layers were separated. The aqueous layer was extracted twice with CH<sub>2</sub>Cl<sub>2</sub> and the combined organic layers were washed with 1 M HCl, saturated NaHCO<sub>3</sub> and brine, successively, and then evaporated. Purification by column chromatography on silica gel eluting with petroleum ether and EtOAc gave the hydroxamide compounds 2.

## 3. Optimization of Reaction conditions

### 3.1 General Procedure for the synthesis of products 3 (3a as an example).

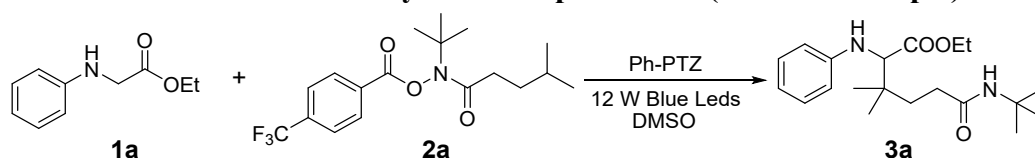

In a dry 10 ml sealed glass tube, add **1a** (0.10 mmol, 1.0 equiv.), **2a** (0.15 mmol, 1.5 equiv.) and photocatalyst Ph-PTZ (5 mol%). Then, the tube was evacuated and backfilled with nitrogen (three times). Subsequently, add solvent DMSO (1 mL). After irradiating the reaction mixture with 12W Blue LEDs for 24h. After that, the resulting mixture was quenched with H<sub>2</sub>O and extracted with EtOAc (3 x 10 mL). The combined organic phase was washed with brine (10 mL), dried over Na<sub>2</sub>SO<sub>4</sub>, and concentrated in vacuo. The residue was purified by silica gel chromatography to obtain the products **3a**.

### 3.2 Optimization of the Reaction 1a, 2a

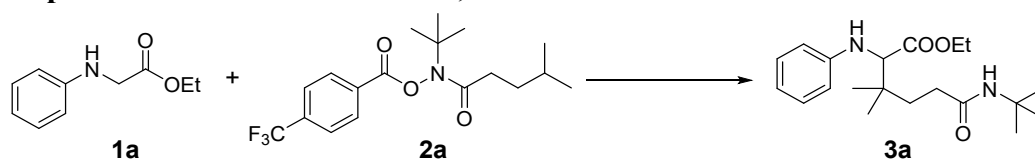

| Entry | Photocatalyst | Base               | Solvent     | Yields(%) <sup>a</sup> |
|-------|---------------|--------------------|-------------|------------------------|
| 1     | 4CzIPN        | NaHCO <sub>3</sub> | DMSO        | 71..5                  |
| 2     | 4CzIPN        | DABCO              | DMSO        | 77.5                   |
| 3     | 4CzIPN        | DABCO              | MeCN        | trace                  |
| 4     | <b>4CzIPN</b> | <b>None</b>        | <b>DMSO</b> | <b>74.0</b>            |

<sup>a</sup> Reaction conditions: **1a** (0.1 mmol, 1.0 equiv.), **2a** (0.15 mmol, 1.5 equiv.), Solvent (1.0 mL), PC (5 mol%), Base (2.0 equiv), Blue LEDs 12 W, for 24 h, under N<sub>2</sub>, isolated yield.

### Photocatalyst

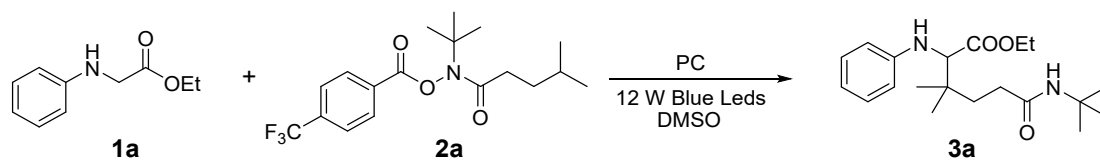

| Entry | Photocatalyst                                                 | Yields(%) <sup>a</sup> |
|-------|---------------------------------------------------------------|------------------------|
| 1     | 4CzIPN                                                        | 74.0                   |
| 2     | 4CzTPN                                                        | 72.0                   |
| 3     | Eosin Y                                                       | 68.3                   |
| 4     | <b>Ph-PTZ</b>                                                 | <b>94.0</b>            |
| 5     | fac-Ir(ppy) <sub>3</sub>                                      | trace                  |
| 6     | Mes-Acr <sup>+</sup> ClO <sub>4</sub> <sup>-</sup>            | 0                      |
| 7     | Ru(bpy) <sub>3</sub> Cl <sub>2</sub>                          | 0                      |
| 8     | [Ir(dFCF <sub>3</sub> ppy) <sub>2</sub> (bpy)]PF <sub>6</sub> | trace                  |
| 9     | none                                                          | 0                      |

<sup>a</sup> Reaction conditions: **1a** (0.1 mmol, 1.0 equiv.), **2a** (0.15 mmol, 1.5 equiv.), DMSO (1.0 mL), PC (5 mol%), Blue LEDs 12 W, for 24 h, under N<sub>2</sub>, isolated yield.

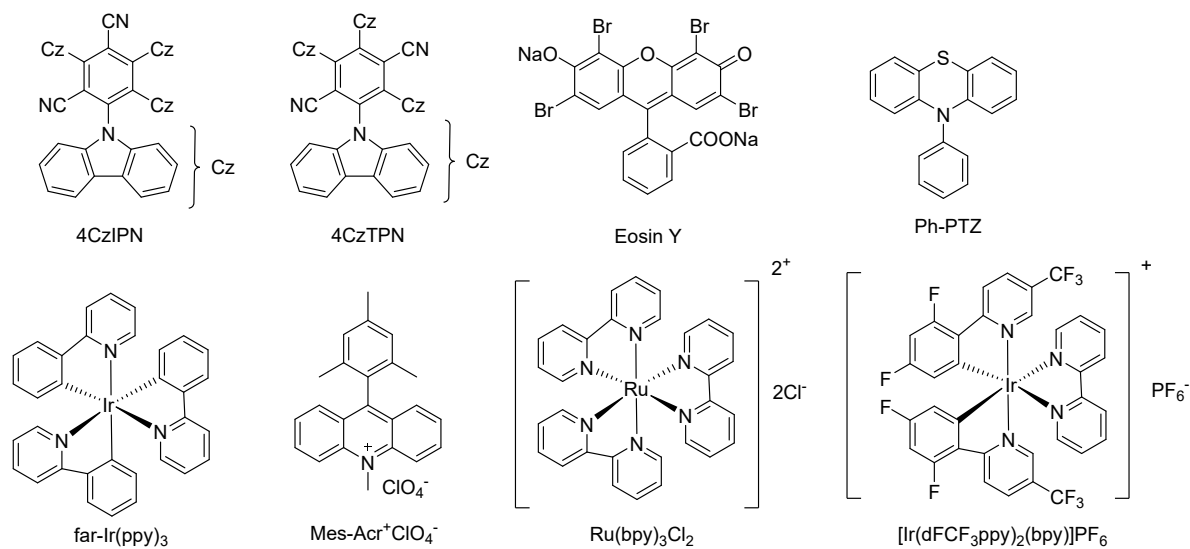

### Solvent

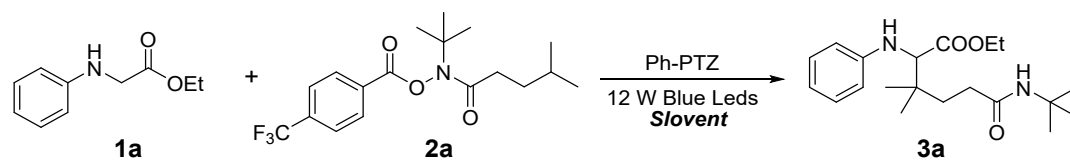

| Entry | Solvent     | Yields(%) <sup>a</sup> |
|-------|-------------|------------------------|
| 1     | <b>DMSO</b> | <b>94.0</b>            |
| 2     | DMF         | 50.5                   |
| 3     | DMA         | 44.7                   |
| 4     | NMP         | 0                      |
| 5     | THF         | trace                  |
| 6     | Dioxane     | 0                      |

|    |         |       |
|----|---------|-------|
| 7  | Acetone | trace |
| 8  | EA      | 0     |
| 9  | MeCN    | trace |
| 10 | MeOH    | 0     |

<sup>a</sup> Reaction conditions: **1a** (0.1 mmol, 1.0 equiv.), **2a** (0.15 mmol, 1.5 equiv.), Solvent (1.0 mL), Ph-PTZ (5 mol%), Blue LEDs 12 W, for 24 h, under N<sub>2</sub>, isolated yield.

#### Light source

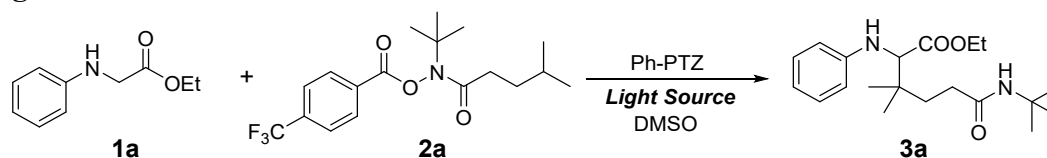

| Entry | Light source            | Yields(%) <sup>a</sup> |
|-------|-------------------------|------------------------|
| 1     | 425nm 12W               | 53.9                   |
| 2     | <b>Blue LEDs 12W</b>    | <b>94.0</b>            |
| 3     | 390nm 12W               | 41.3                   |
| 4     | White LEDs 12W          | 60.0                   |
| 5     | 525nm 12W               | trace                  |
| 6     | 425nm 2*40W Kessil lamp | 65.0                   |
| 7     | 455nm 2*40W Kessil lamp | 78.5                   |

<sup>a</sup> Reaction conditions: **1a** (0.1 mmol, 1.0 equiv.), **2a** (0.15 mmol, 1.5 equiv.), DMSO (1.0 mL), Ph-PTZ (5 mol%), Light source, for 24 h, under N<sub>2</sub>, isolated yield.

#### 4. Scale-up preparation

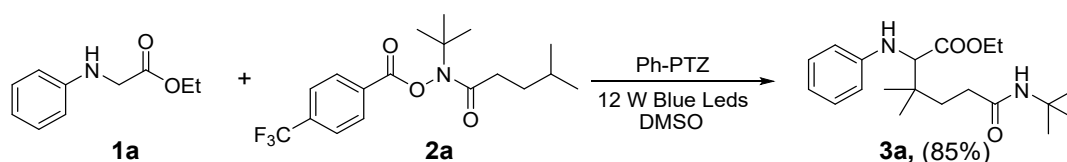

To a flame-dried 50 ml thick-walled pressure bottle equipped with magnetic stirrer, add **1a** (6.0 mmol, 1.0 equiv.), **2a** (9.0 mmol, 1.5 equiv.), photocatalyst Ph-PTZ (5 mol%) and 35 mL dry DMSO. The flask was charged with argon ( three times).After irradiating the reaction mixture with 12W Blue LEDs for 24h ( Figure S2 ). Tthe resulting mixture was quenched with H<sub>2</sub>O and extracted with EtOAc (3 x 10 mL). The combined organic phase was washed with brine (10 mL), dried over Na<sub>2</sub>SO<sub>4</sub>, and concentrated in vacuo. The crude product was purified by column chromatography on silica gel to give the pure product **3a**.



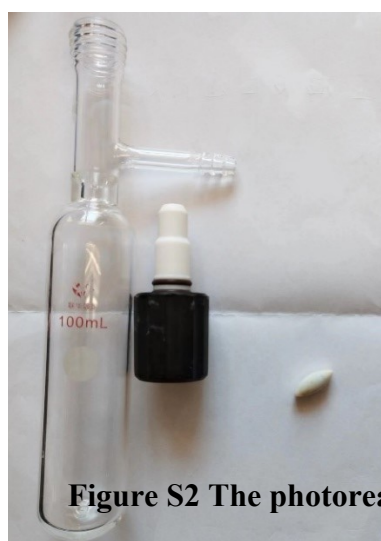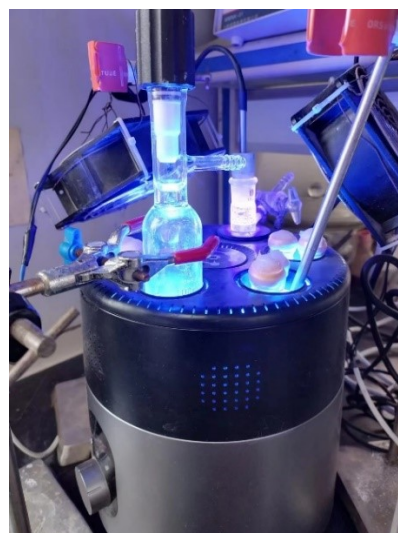

Figure S2 The photoreactor of scale-up reaction

## 5. Compatibility with biomolecules

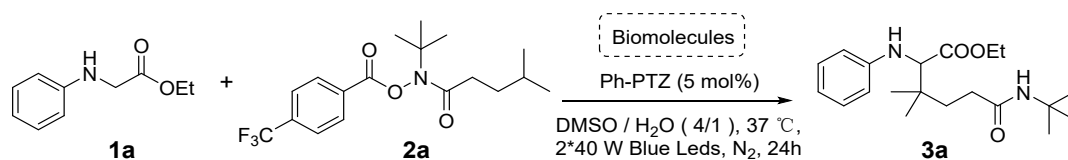

| Entry | Biomolecules                                                                                              | Yields <sup>a</sup> | Entry | Biomolecules                                                                                                    | Yields <sup>a</sup> |
|-------|-----------------------------------------------------------------------------------------------------------|---------------------|-------|-----------------------------------------------------------------------------------------------------------------|---------------------|
| 1     | none                                                                                                      | 65%                 | 4     | 10 mg ml <sup>-1</sup> Lysozyme                                                                                 | 47%                 |
| 2     | 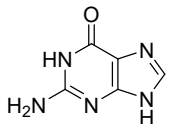<br>Guanine 1.0 equiv  | 41%                 | 5     | <br>D-(+)-Glucose 1.0 equiv | 44%                 |
| 3     | <br>D-Biotin 1.0 equiv | 51%                 | 6     | <br>L-Proline 1.0 equiv     | 40%                 |

In a dry 10 ml sealed glass tube, add **1a** (0.10 mmol, 1.0 equiv.), **2a** (0.15 mmol, 1.5 equiv.), photocatalyst Ph-PTZ (5 mol%) and biomolecules. Then, the tube was evacuated and backfilled with nitrogen (three times). Subsequently, add solvent DMSO (0.8 ml) and H<sub>2</sub>O (0.2 ml). The vial was sealed and exposed to Blue LEDs at 37 °C for 24 h ( Figure S3 ).

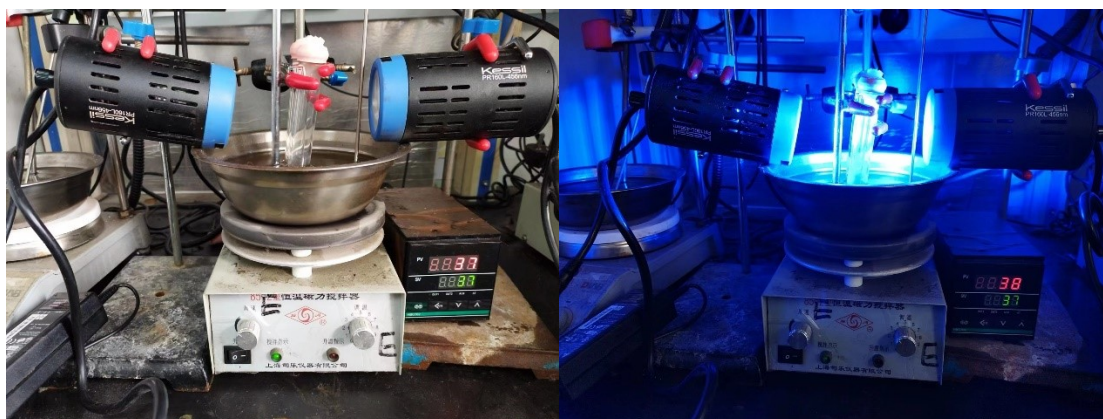

Figure S3 The photoreactor of biomolecules reaction

## 6. The mechanistic studies

### 6.1 Radical trapping experiments

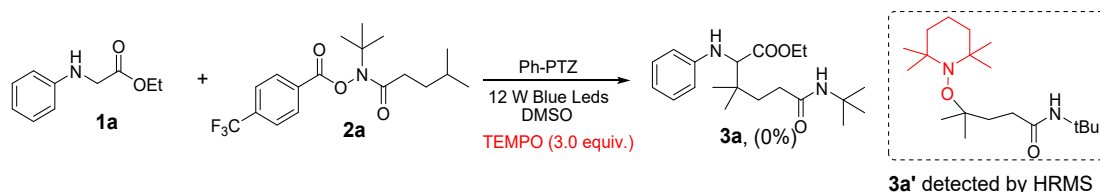

In a dry 10 ml sealed glass tube, **1a** (0.10 mmol, 1.0 equiv.), **2a** (0.15 mmol, 1.5 equiv.), photocatalyst Ph-PTZ (5 mol%) and TEMPO (0.30 mmol, 3.0 equiv.) were added. Then, the tube was evacuated and backfilled with nitrogen (three times). Subsequently, add solvent DMSO (1 mL). After irradiating the reaction mixture with 12W Blue LEDs ( $\lambda = 455$  nm) for 24h. After that, the resulting mixture was quenched with H<sub>2</sub>O and extracted with EtOAc (3 x 10 mL). The combined organic phase was washed with brine (10 mL), dried over Na<sub>2</sub>SO<sub>4</sub>, and concentrated in vacuo.

When 3.0 equiv. of TEMPO was subjected into the reaction of **1a** with **2a** under the standard conditions, only a trace amount of **3a** was observed, along with the TEMPO adduct **3a'** was detected by LC-HRMS (327.3).

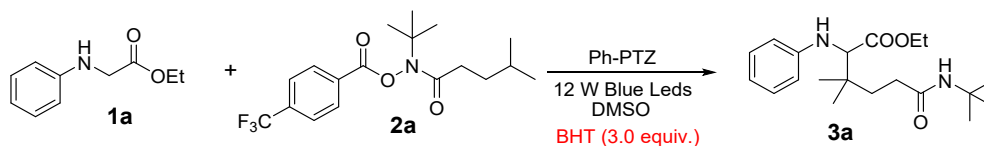

**1a** (0.10 mmol, 1.0 equiv.), **2a** (0.15 mmol, 1.5 equiv.), photocatalyst Ph-PTZ (5 mol%) were added in a dry 10 ml sealed glass tube. Then, the tube was evacuated and backfilled with nitrogen (three times). Then BHT (0.3 mmol, 3.0 equiv.), and 1 mL DMSO were injected. The reaction mixture with 12W Blue LEDs ( $\lambda = 455$  nm) for 24h. After that, the resulting mixture was quenched with H<sub>2</sub>O and extracted with EtOAc (3 x 10 mL). The combined organic phase was washed with brine (10 mL), dried over Na<sub>2</sub>SO<sub>4</sub>, and concentrated in vacuo. The radical trapping product **4a** (68%) was obtained by column chromatography on silica gel.

Only a trace amount of **3a** was observed. This result indicates that a radical pathway might be involved in this transformation.

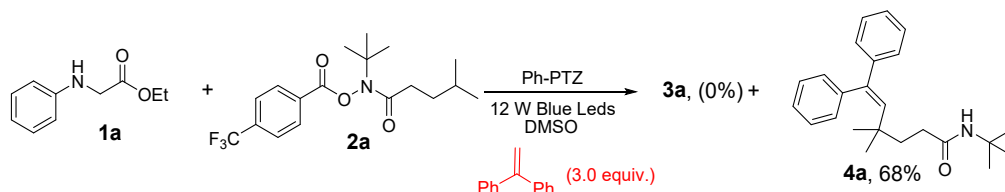

In a dry 10 ml sealed glass tube, **1a** (0.10 mmol, 1.0 equiv.), **2a** (0.15 mmol, 1.5 equiv.), photocatalyst Ph-PTZ (5 mol%) were added. Then, the tube was evacuated and backfilled with nitrogen (three times). Then 1,1-diphenylene (0.3 mmol, 3.0 equiv.), and 1 mL dry DMSO were injected. The reaction mixture with 12W Blue LEDs ( $\lambda = 455$  nm) for 24h. After that, the resulting mixture was quenched with H<sub>2</sub>O and extracted with EtOAc (3 x 10 mL). The combined organic phase was washed with brine (10 mL), dried over Na<sub>2</sub>SO<sub>4</sub>, and concentrated in vacuo. The radical trapping product **4a** (68%) was obtained by column chromatography on silica gel.

## 7. References

- [1] A. V. Jerezano, E. M. Labarrios and F. E. Jiménez. Iodine-mediated one-pot synthesis of indoles and 3-dimethylaminoindoles via annulation of enamines. *Arkivoc*, 2014, 318-53.
- [2] W. Chao, G. Meng, Qi. Ru. Visible-light-driven, copper-catalyzed decarboxylative C (sp<sup>3</sup>)-H alkylation of glycine and peptides. *Angewandte Chemie*, 2018, **130**(48), 16067-16072.
- [3] H. Chen, L. Guo, S. Yu. Primary, Secondary, and Tertiary gamma-C(sp<sup>3</sup>)-H Vinylation of Amides via Organic Photoredox-Catalyzed Hydrogen Atom Transfer. *Org Lett*, 2018, **20** (19), 6255-6259.

## 8. Characterization of Products

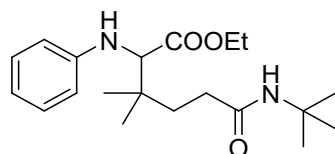

### Ethyl 6-(tert-butylamino)-3,3-dimethyl-6-oxo-2-(phenylamino)hexanoate (**3a**).

Yellow solid (94%, 32.6 mg); m.p.: 115-120 °C;  $R_f = 0.30$  (petroleum ether/ethyl acetate = 5:1); <sup>1</sup>H NMR (400 MHz, CDCl<sub>3</sub>)  $\delta$  7.20 – 7.12 (m, 2H), 6.76 – 6.72 (m, 1H), 6.69 – 6.61 (m, 2H), 5.26 (s, 1H), 4.17 – 4.12 (m, 2H), 3.83 (s, 1H), 2.23 – 2.04 (m, 2H), 1.79 – 1.70 (m, 2H), 1.31 (s, 9H), 1.21 (t,  $J = 7.1$  Hz, 3H), 1.03 (d,  $J = 4.5$  Hz, 6H). <sup>13</sup>C NMR (100 MHz, CDCl<sub>3</sub>)  $\delta$  173.22, 172.36, 147.57, 129.48, 118.72, 114.06, 64.01, 60.93, 51.24, 36.83, 35.68, 32.58, 28.93, 24.29, 23.59, 14.42. HRMS (ESI) calcd for C<sub>20</sub>H<sub>33</sub>N<sub>2</sub>O<sub>3</sub> [M+H]<sup>+</sup> 349.4945, found 349.4940.

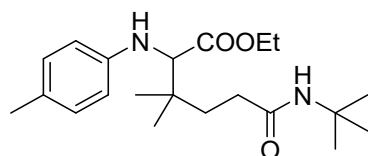

**Ethyl 6-(tert-butylamino)-3,3-dimethyl-6-oxo-2-(p-tolylamino)hexanoate (3b).**

Yellow solid (99%, 35.9 mg) ; m.p.: 120-125 °C;  $R_f$  = 0.35 (petroleum ether/ethyl acetate = 5:1);  $^1\text{H NMR}$  (400 MHz,  $\text{CDCl}_3$ )  $\delta$  6.97 (d,  $J$  = 8.3 Hz, 2H), 6.60 – 6.54 (m, 2H), 5.29 (s, 1H), 4.16 – 4.09 (m, 2H), 3.78 (s, 1H), 2.22 (s, 3H), 2.18 – 2.02 (m, 2H), 1.80 – 1.65 (m, 2H), 1.31 (s, 9H), 1.21 (t,  $J$  = 7.1 Hz, 3H), 1.02 (d,  $J$  = 4.6 Hz, 6H).  $^{13}\text{C NMR}$  (100 MHz,  $\text{CDCl}_3$ )  $\delta$  172.24, 171.30, 144.11, 128.79, 126.81, 113.09, 63.22, 59.69, 50.04, 35.60, 34.59, 31.42, 27.75, 23.15, 22.42, 19.35, 13.27. **HRMS (ESI)** calcd for  $\text{C}_{21}\text{H}_{35}\text{N}_2\text{O}_3$   $[\text{M}+\text{H}]^+$  363.5215, found 363.5211.

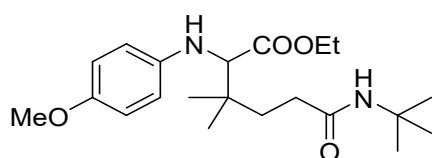

**Ethyl 6-(tert-butylamino)-2-((4-methoxyphenyl)amino)-3,3-dimethyl-6-oxohexanoate (3c).**

Colorless oil (98%, 36.9 mg) ;  $R_f$  = 0.35 (petroleum ether/ethyl acetate = 5:1);  $^1\text{H NMR}$  (400 MHz,  $\text{CDCl}_3$ )  $\delta$  6.78 – 6.70 (m, 2H), 6.66 – 6.56 (m, 2H), 5.33 (s, 1H), 4.13 – 4.09 (m, 2H), 3.72 (s, 3H), 3.70 (s, 1H), 2.21 – 2.03 (m, 2H), 1.76 – 1.70 (m, 2H), 1.30 (s, 9H), 1.19 (t,  $J$  = 7.1 Hz, 3H), 1.01 (d,  $J$  = 6.7 Hz, 6H).  $^{13}\text{C NMR}$  (100 MHz,  $\text{CDCl}_3$ )  $\delta$  172.37, 171.33, 151.89, 140.47, 114.65, 113.82, 64.34, 59.67, 54.67, 50.04, 35.52, 34.57, 31.42, 27.76, 23.14, 22.40, 13.27. **HRMS (ESI)** calcd for  $\text{C}_{21}\text{H}_{35}\text{N}_2\text{O}_4$   $[\text{M}+\text{H}]^+$  379.5205, found 379.5210.

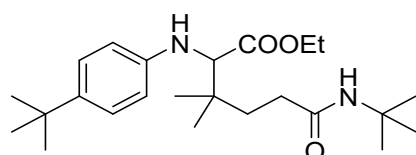

**Ethyl 2-((4-(tert-butyl)phenyl)amino)-6-(tert-butylamino)-3,3-dimethyl-6-oxohexanoate (3d).**

Yellow oil (76%, 30.7 mg) ;  $R_f$  = 0.30 (petroleum ether/ethyl acetate = 5:1);  $^1\text{H NMR}$  (400 MHz,  $\text{CDCl}_3$ )  $\delta$  7.21 – 7.14 (m, 2H), 6.63 – 6.54 (m, 2H), 5.29 (s, 1H), 4.16 – 4.11 (m, 3H), 3.80 (s, 1H), 2.24 – 2.03 (m, 2H), 1.80 – 1.66 (m, 2H), 1.31 (s, 9H), 1.22 (t,  $J$  = 7.2 Hz, 3H), 1.03 (d,  $J$  = 4.4 Hz, 6H).  $^{13}\text{C NMR}$  (100 MHz,  $\text{CDCl}_3$ )  $\delta$  173.42, 172.41, 145.12, 141.40, 126.22, 113.70, 64.13, 60.84, 51.18, 36.82, 35.67, 33.99, 32.59, 31.61, 28.90, 24.25, 23.58, 14.39. **HRMS (ESI)** calcd for  $\text{C}_{24}\text{H}_{41}\text{N}_2\text{O}_3$   $[\text{M}+\text{H}]^+$  405.6025, found 405.6026.

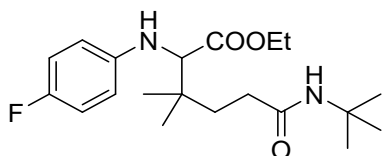

**Ethyl 6-(tert-butylamino)-2-((4-fluorophenyl)amino)-3,3-dimethyl-6-oxohexanoate (3e).**

Yellow oil (99%, 33.0 mg) ;  $R_f = 0.25$  (petroleum ether/ethyl acetate = 5:1);  $^1\text{H NMR}$  (400 MHz,  $\text{CDCl}_3$ )  $\delta$  6.96 – 6.82 (m, 2H), 6.64 – 6.53 (m, 2H), 5.28 (s, 1H), 4.15 – 4.12 (m, 2H), 3.72 (s, 1H), 2.22 – 2.01 (m, 2H), 1.76 – 1.71 (m, 2H), 1.32 (s, 8H), 1.21 (t,  $J = 7.1$  Hz, 3H), 1.02 (d,  $J = 5.4$  Hz, 6H).  $^{13}\text{C NMR}$  (100 MHz,  $\text{CDCl}_3$ )  $\delta$  173.21, 172.32, 156.57 (d,  $J = 236.4$  Hz), 143.90 (d,  $J = 2.0$  Hz), 115.88 (d,  $J = 22.3$  Hz), 115.29 (d,  $J = 7.5$  Hz), 65.17, 60.95, 51.26, 36.72, 35.54, 32.50, 28.92, 24.26, 23.51, 14.41.  $^{19}\text{F NMR}$  (376 MHz,  $\text{CDCl}_3$ )  $\delta$  -126.02. **HRMS (ESI)** calcd for  $\text{C}_{20}\text{H}_{32}\text{FN}_2\text{O}_3$   $[\text{M}+\text{H}]^+$  367.4849, found 367.4845.

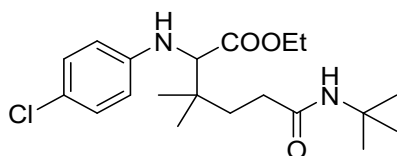

**Ethyl 6-(tert-butylamino)-2-((4-chlorophenyl)amino)-3,3-dimethyl-6-oxohexanoate (3f).**

Yellow oil (85%, 32.5 mg) ;  $R_f = 0.25$  (petroleum ether/ethyl acetate = 5:1);  $^1\text{H NMR}$  (400 MHz,  $\text{CDCl}_3$ )  $\delta$  7.17 – 7.05 (m, 2H), 6.60 – 6.53 (m, 2H), 5.26 (s, 1H), 4.17 – 4.11 (m, 2H), 3.76 (s, 1H), 2.19 – 2.05 (m, 2H), 1.73 (dd,  $J = 9.2, 6.0$  Hz, 3H), 1.31 (s, 9H), 1.22 (t,  $J = 7.2$  Hz, 3H), 1.02 (d,  $J = 3.4$  Hz, 6H).  $^{13}\text{C NMR}$  (100 MHz,  $\text{CDCl}_3$ )  $\delta$  172.94, 172.22, 146.19, 129.29, 123.32, 115.18, 64.33, 61.06, 51.28, 36.81, 35.46, 32.46, 28.92, 24.24, 23.52, 14.42. **HRMS (ESI)** calcd for  $\text{C}_{20}\text{H}_{32}\text{ClN}_2\text{O}_3$   $[\text{M}+\text{H}]^+$  383.9365, found 383.9360.

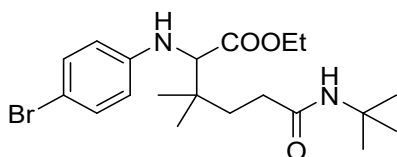

**Ethyl 2-((4-bromophenyl)amino)-6-(tert-butylamino)-3,3-dimethyl-6-oxohexanoate (3g)**

Yellow oil (89%, 38.0 mg) ;  $R_f = 0.25$  (petroleum ether/ethyl acetate = 5:1);  $^1\text{H NMR}$  (400 MHz, Chloroform-d)  $\delta$  7.17 (d,  $J = 8.3$  Hz, 2H), 6.46 (d,  $J = 8.8$  Hz, 2H), 5.21 (s, 1H), 4.12 – 4.04 (m, 2H), 3.69 (s, 1H), 2.13 – 1.96 (m, 2H), 1.70 – 1.63 (m, 2H), 1.29 – 1.23 (m, 9H), 1.17 – 1.12 (m, 3H), 0.95 (d,  $J = 3.1$  Hz, 6H).  $^{13}\text{C NMR}$  (100 MHz,  $\text{CDCl}_3$ )  $\delta$  172.86, 172.20, 146.61, 132.17, 115.63, 110.37, 64.18, 61.07, 51.28, 36.81, 35.44, 32.44, 28.92, 24.24, 23.52, 14.42. **HRMS (ESI)** calcd for  $\text{C}_{20}\text{H}_{32}\text{BrN}_2\text{O}_3$   $[\text{M}+\text{H}]^+$  428.3905, found 428.3912.

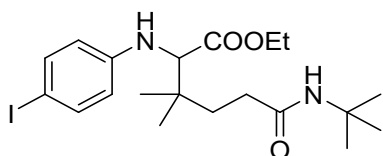

**Ethyl 6-(tert-butylamino)-2-((4-iodophenyl)amino)-3,3-dimethyl-6-oxohexanoate (3h).**

Yellow oil (81%, 38.0 mg) ;  $R_f = 0.25$  (petroleum ether/ethyl acetate = 5:1);  $^1\text{H NMR}$  (400 MHz,  $\text{CDCl}_3$ )  $\delta$  7.46 – 7.36 (m, 2H), 6.47 – 6.41 (m, 2H), 5.25 (s, 1H), 4.20 (s, 1H), 4.17 – 4.11 (m, 2H), 3.76 (d,  $J = 10.1$  Hz, 1H), 2.20 – 2.03 (m, 2H), 1.74 – 1.68 (m, 2H), 1.31 (s, 9H), 1.22 (t,  $J = 7.1$  Hz, 3H), 1.01 (d,  $J = 2.6$  Hz, 6H).  $^{13}\text{C NMR}$  (100 MHz,  $\text{CDCl}_3$ )  $\delta$  172.83, 172.17, 147.23, 138.03, 116.16, 79.51, 63.92, 61.08, 51.27, 36.82, 35.42, 32.42, 28.92, 24.23, 23.52, 14.42. **HRMS (ESI)** calcd for  $\text{C}_{20}\text{H}_{32}\text{IN}_2\text{O}_3$   $[\text{M}+\text{H}]^+$  475.3910, found 475.3915.

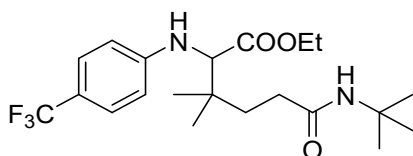

**Ethyl 6-(tert-butylamino)-3,3-dimethyl-6-oxo-2-((4-(trifluoromethyl)phenyl)amino)hexanoate (3i)**

Yellow oil (50%, 20.8 mg) ;  $R_f = 0.25$  (petroleum ether/ethyl acetate = 5:1);  $^1\text{H NMR}$  (400 MHz,  $\text{CDCl}_3$ )  $\delta$  7.39 (d,  $J = 8.4$  Hz, 2H), 6.66 (d,  $J = 8.4$  Hz, 2H), 5.26 (s, 1H), 4.50 (d,  $J = 10.0$  Hz, 1H), 4.19 – 4.14 (m, 2H), 3.86 (d,  $J = 9.2$  Hz, 1H), 2.26 – 2.02 (m, 2H), 1.78 – 1.69 (m, 2H), 1.32 (s, 9H), 1.23 (t,  $J = 7.1$  Hz, 3H), 1.03 (d,  $J = 2.3$  Hz, 6H).  $^{13}\text{C NMR}$  (100 MHz,  $\text{CDCl}_3$ )  $\delta$  172.54, 172.09, 150.13, 126.83 (q,  $J = 3.7$  Hz), 124.87 (d,  $J = 270.5$  Hz), 120.15 (q,  $J = 32.7$  Hz), 112.98, 63.55, 61.22, 51.30, 36.97, 35.25, 32.36, 28.90, 24.19, 23.53, 14.39.  $^{19}\text{F NMR}$  (376 MHz,  $\text{CDCl}_3$ )  $\delta$  -61.23. **HRMS (ESI)** calcd for  $\text{C}_{21}\text{H}_{32}\text{F}_3\text{N}_2\text{O}_3$   $[\text{M}+\text{H}]^+$  417.4927, found 417.4928.

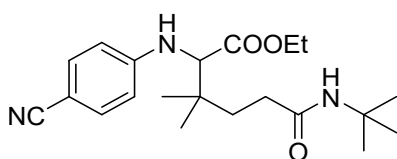

**Ethyl 6-(tert-butylamino)-2-((4-cyanophenyl)amino)-3,3-dimethyl-6-oxohexanoate (3j).**

Yellow oil (57%, 21.3mg) ;  $R_f = 0.30$  (petroleum ether/ethyl acetate = 5:1);  $^1\text{H NMR}$  (400 MHz,  $\text{CDCl}_3$ )  $\delta$  7.43 – 7.38 (m, 2H), 6.64 – 6.58 (m, 2H), 5.29 (s, 1H), 4.20 – 4.15 (m, 2H), 3.86 (s, 1H), 2.22 – 2.02 (m, 3H), 1.73 (t,  $J = 8.2$  Hz, 2H), 1.32 (s, 9H), 1.25 – 1.24 (m, 3H), 1.02 (d,  $J = 2.0$  Hz, 6H).  $^{13}\text{C NMR}$  (100 MHz,  $\text{CDCl}_3$ )  $\delta$  172.06, 171.97, 150.85, 133.89, 120.15, 113.26, 100.25, 63.37, 61.37, 51.34, 37.10, 34.94, 32.23, 28.90, 24.17, 23.52, 14.38. **HRMS (ESI)** calcd for  $\text{C}_{21}\text{H}_{32}\text{N}_3\text{O}_3$   $[\text{M}+\text{H}]^+$  374.5045, found 374.5040.

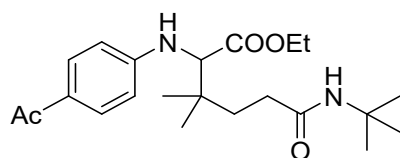

**Ethyl 2-((4-acetylphenyl)amino)-6-(tert-butylamino)-3,3-dimethyl-6-oxohexanoate (3k).**

Yellow oil (78%, 30.5mg) ;  $R_f = 0.25$  (petroleum ether/ethyl acetate = 5:1);  $^1\text{H NMR}$  (400 MHz,  $\text{CDCl}_3$ )  $\delta$  7.83 – 7.75 (m, 2H), 6.65 – 6.56 (m, 2H), 5.35 (s, 1H), 4.16 (q,  $J = 7.1$  Hz, 2H), 3.92 (d,  $J = 8.4$  Hz, 1H), 2.48 (s, 3H), 2.25 – 2.02 (m, 3H), 1.79 – 1.71 (m, 2H), 1.31 (s, 9H), 1.22 (t,  $J = 7.1$  Hz, 3H), 1.03 (d,  $J = 2.2$  Hz, 6H).  $^{13}\text{C NMR}$  (100 MHz,  $\text{CDCl}_3$ )  $\delta$  196.50, 172.28, 172.19, 151.60, 130.88, 127.84, 112.46, 63.31, 61.25, 51.32, 37.08, 35.14, 32.31, 28.88, 26.15, 24.15, 23.52, 14.38. **HRMS (ESI)** calcd for  $\text{C}_{22}\text{H}_{35}\text{N}_2\text{O}_4$   $[\text{M}+\text{H}]^+$  391.5315, found 391.5319.

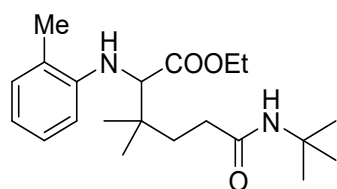

**Ethyl 6-(tert-butylamino)-3,3-dimethyl-6-oxo-2-(o-tolylamino)hexanoate (3l).**

Yellow oil (70%, 25.4mg) ;  $R_f = 0.30$  (petroleum ether/ethyl acetate = 5:1);  $^1\text{H NMR}$  (400 MHz,  $\text{CDCl}_3$ )  $\delta$  7.06 (d,  $J = 8.0$  Hz, 2H), 6.68 (t,  $J = 7.4$  Hz, 1H), 6.59 (d,  $J = 8.0$  Hz, 1H), 5.27 (s, 1H), 4.17 – 4.11 (m, 2H), 3.89 (s, 1H), 2.21 (s, 3H), 2.13 – 2.04 (m, 2H), 1.79 – 1.69 (m, 2H), 1.31 (s, 9H), 1.22 (t,  $J = 7.2$  Hz, 3H), 1.06 (d,  $J = 7.6$  Hz, 6H).  $^{13}\text{C NMR}$  (100MHz,  $\text{CDCl}_3$ )  $\delta$  173.35, 172.33, 145.53, 130.54, 127.21, 123.39, 118.20, 110.74, 63.51, 60.91, 51.19, 36.91, 35.87, 32.55, 28.90, 24.23, 23.66, 17.59, 14.38. **HRMS (ESI)** calcd for  $\text{C}_{21}\text{H}_{35}\text{N}_2\text{O}_3$   $[\text{M}+\text{H}]^+$  363.5215, found 363.5220.

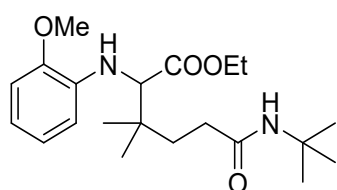

**Ethyl 6-(tert-butylamino)-2-((2-methoxyphenyl)amino)-3,3-dimethyl-6-oxohexanoate (3m).**

Yellow oil (84%, 31.8mg) ;  $R_f = 0.30$  (petroleum ether/ethyl acetate = 5:1);  $^1\text{H NMR}$  (400 MHz,  $\text{CDCl}_3$ )  $\delta$  6.84 – 6.80 (m, 1H), 6.77 (dd,  $J = 8.0, 1.4$  Hz, 1H), 6.68 (td,  $J = 7.7, 1.5$  Hz, 1H), 6.57 (dd,  $J = 7.9, 1.5$  Hz, 1H), 5.30 (s, 1H), 4.17 – 4.09 (m, 2H), 3.85 (s, 3H), 2.25 – 2.03 (m, 2H), 1.78 – 1.74 (m, 2H), 1.30 (s, 9H), 1.21 (t,  $J = 7.1$  Hz, 3H), 1.06 (d,  $J = 7.3$  Hz, 6H).  $^{13}\text{C NMR}$  (100 MHz,  $\text{CDCl}_3$ )  $\delta$  173.20, 172.46, 147.41, 137.40, 121.21, 117.58, 110.44, 109.97, 63.41, 60.76, 55.69, 51.12, 36.82, 35.90, 32.60, 28.85, 24.26, 23.58, 14.36. **HRMS (ESI)** calcd for  $\text{C}_{21}\text{H}_{35}\text{N}_2\text{O}_4$   $[\text{M}+\text{H}]^+$  379.2594, found 379.2593.

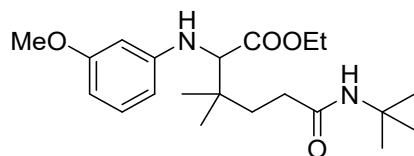

**Ethyl 6-(tert-butylamino)-2-((3-methoxyphenyl)amino)-3,3-dimethyl-6-oxohexanoate (3n).**

Yellow oil (88%, 33.3mg) ;  $R_f = 0.35$  (petroleum ether/ethyl acetate = 5:1);  $^1\text{H NMR}$  (400 MHz,  $\text{CDCl}_3$ )  $\delta$  7.06 (t,  $J = 8.1$  Hz, 1H), 6.27 (ddd,  $J = 15.8, 8.1, 2.3$  Hz, 2H), 6.20 (d,  $J = 2.4$  Hz, 1H), 5.29 (s, 1H), 4.14 (qd,  $J = 7.2, 2.0$  Hz, 2H), 3.81 (s, 1H), 3.75 (s, 3H), 2.22 – 2.04 (m, 2H), 1.75 – 1.69 (m, 2H), 1.31 (s, 9H), 1.22 (t,  $J = 7.2$  Hz, 3H), 1.02 (d,  $J = 4.3$  Hz, 6H).  $^{13}\text{C NMR}$  (100MHz,  $\text{CDCl}_3$ )  $\delta$  173.12, 172.33, 160.91, 148.96, 130.21, 106.82, 103.87, 99.98, 63.80, 60.91, 55.20, 51.19, 36.80, 35.60, 32.50, 28.88, 24.26, 23.58, 14.39. **HRMS (ESI)** calcd for  $\text{C}_{21}\text{H}_{35}\text{N}_2\text{O}_4$   $[\text{M}+\text{H}]^+$  379.5205, found 379.5211.

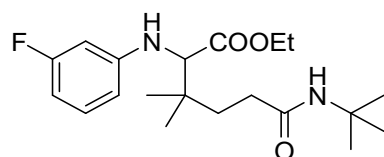

**Ethyl 6-(tert-butylamino)-2-((3-fluorophenyl)amino)-3,3-dimethyl-6-oxohexanoate (3o).**

Yellow oil (65%, 23.8mg) ;  $R_f = 0.25$  (petroleum ether/ethyl acetate = 5:1);  $^1\text{H NMR}$  (400 MHz,  $\text{CDCl}_3$ )  $\delta$  7.08 (td,  $J = 8.1, 6.7$  Hz, 1H), 6.43 – 6.39 (m, 2H), 6.35 – 6.31 (m, 1H), 5.29 (s, 1H), 4.18 – 4.13 (m, 2H), 3.78 (s, 1H), 2.19 – 2.08 (m, 2H), 1.75 – 1.70 (m, 2H), 1.32 (s, 9H), 1.23 (t,  $J = 7.2$  Hz, 3H), 1.02 (d,  $J = 3.5$  Hz, 6H).  $^{13}\text{C NMR}$  (100 MHz,  $\text{CDCl}_3$ )  $\delta$  172.81, 172.24, 164.10 (d,  $J = 243.5$  Hz), 149.38 (d,  $J = 10.5$  Hz), 130.55 (d,  $J = 10.2$  Hz), 109.82 (d,  $J = 2.3$  Hz), 105.09 (d,  $J = 21.5$  Hz), 100.64 (d,  $J = 25.5$  Hz), 63.91, 61.08, 51.28, 36.85, 35.42, 32.42, 28.90, 24.22, 23.55, 14.39.  $^{19}\text{F NMR}$  (376 MHz,  $\text{CDCl}_3$ )  $\delta$  -112.52 (dt,  $J = 11.6, 7.6$  Hz). **HRMS (ESI)** calcd for  $\text{C}_{20}\text{H}_{32}\text{FN}_2\text{O}_3$   $[\text{M}+\text{H}]^+$  367.4849, found 367.4851.

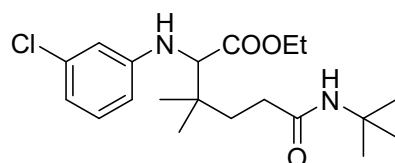

**Ethyl 6-(tert-butylamino)-2-((3-chlorophenyl)amino)-3,3-dimethyl-6-oxohexanoate (3p).**

Yellow oil (54%, 20.7mg) ;  $R_f = 0.30$  (petroleum ether/ethyl acetate = 5:1);  $^1\text{H NMR}$  (400 MHz,  $\text{CDCl}_3$ )  $\delta$  7.06 (t,  $J = 8.0$  Hz, 1H), 6.69 (dd,  $J = 7.9, 1.9$  Hz, 1H), 6.62 (t,  $J = 2.2$  Hz, 1H), 6.52 (dd,  $J = 8.2, 2.4$  Hz, 1H), 5.27 (s, 1H), 4.16 (q,  $J = 7.1$  Hz, 2H), 3.78 (s, 1H), 2.22 – 2.04 (m, 2H), 1.75 – 1.70 (m, 2H), 1.32 (s, 9H), 1.23 (t,  $J = 7.1$  Hz, 3H), 1.02 (d,  $J = 3.3$  Hz, 6H).  $^{13}\text{C NMR}$  (100 MHz,  $\text{CDCl}_3$ )  $\delta$  172.77, 172.18, 148.75, 135.19, 130.44, 118.56, 113.61, 112.34, 63.81, 61.11, 51.28, 36.87, 35.43, 32.44, 28.92,



24.22, 23.56, 14.42. **HRMS (ESI)** calcd for  $C_{20}H_{32}ClN_2O_3$   $[M+H]^+$  383.9365, found 383.9562.

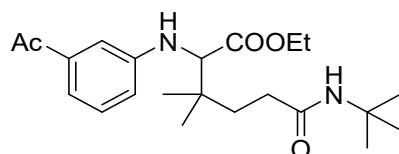

**Ethyl 2-((3-acetylphenyl)amino)-6-(tert-butylamino)-3,3-dimethyl-6-oxohexanoate (3q)**

Yellow oil (70%, 27.3mg) ;  $R_f = 0.25$  (petroleum ether/ethyl acetate = 5:1);  $^1H$  NMR (400 MHz,  $CDCl_3$ )  $\delta$  7.31 (d,  $J = 7.6$  Hz, 1H), 7.24 (s, 1H), 7.23 (d,  $J = 2.9$  Hz, 1H), 6.85 (dd,  $J = 8.0, 2.6$  Hz, 1H), 5.31 (s, 1H), 4.15 (q,  $J = 7.1$  Hz, 2H), 3.89 (s, 1H), 2.56 (s, 3H), 2.21 – 2.08 (m, 2H), 1.77 – 1.72 (m, 2H), 1.31 (s, 9H), 1.22 (d,  $J = 7.1$  Hz, 3H), 1.04 (d,  $J = 4.0$  Hz, 6H).  $^{13}C$  NMR (100 MHz,  $CDCl_3$ )  $\delta$  198.58, 172.93, 172.23, 147.85, 138.31, 129.61, 119.08, 118.90, 112.45, 63.72, 61.08, 51.27, 36.91, 35.43, 32.46, 28.91, 26.85, 24.25, 23.60, 14.41. **HRMS (ESI)** calcd for  $C_{22}H_{35}N_2O_4$   $[M+H]^+$  391.5315, found 391.5309.

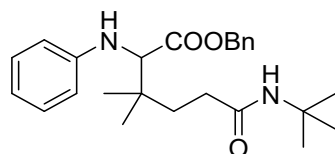

**Benzyl 6-(tert-butylamino)-3,3-dimethyl-6-oxo-2-(phenylamino)hexanoate (3r).**

Yellow oil (78%, 32.0mg) ;  $R_f = 0.40$  (petroleum ether/ethyl acetate = 5:1);  $^1H$  NMR (400 MHz,  $CDCl_3$ )  $\delta$  7.23 (dd,  $J = 4.8, 2.0$  Hz, 3H), 7.17 (dt,  $J = 6.0, 2.5$  Hz, 2H), 7.08 (t,  $J = 7.7$  Hz, 2H), 6.68 (t,  $J = 7.3$  Hz, 1H), 6.57 (d,  $J = 8.0$  Hz, 2H), 5.21 (s, 1H), 5.02 (s, 2H), 3.82 (s, 1H), 3.54 (s, 1H), 2.13 – 1.97 (m, 2H), 1.72 – 1.60 (m, 2H), 1.23 (s, 9H), 0.94 (d,  $J = 7.9$  Hz, 6H).  $^{13}C$  NMR (100 MHz,  $CDCl_3$ )  $\delta$  173.18, 172.32, 147.41, 135.48, 129.48, 128.65, 128.54, 128.44, 118.81, 114.08, 66.82, 64.06, 51.19, 36.82, 35.61, 32.46, 28.86, 24.32, 23.55. **HRMS (ESI)** calcd for  $C_{25}H_{35}N_2O_3$   $[M+H]^+$  411.5655, found 411.5653.

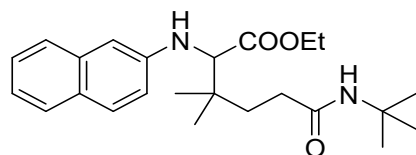

**Ethyl 6-(tert-butylamino)-3,3-dimethyl-2-(naphthalen-2-ylamino)-6-oxohexanoate (3s).**

Yellow oil (65%, 26.0mg) ;  $R_f = 0.35$  (petroleum ether/ethyl acetate = 5:1);  $^1H$  NMR (400 MHz,  $CDCl_3$ )  $\delta$  7.62 – 7.48 (m, 3H), 7.28 (t,  $J = 7.5$  Hz, 1H), 7.20 – 7.07 (m, 1H), 6.88 (dd,  $J = 8.8, 2.4$  Hz, 1H), 6.77 (d,  $J = 2.4$  Hz, 1H), 5.20 (s, 1H), 4.13 – 4.04 (m, 2H), 3.90 (s, 1H), 2.19 – 1.95 (m, 2H), 1.74 – 1.66 (m, 2H), 1.22 (s, 9H), 1.15 (t,  $J = 7.1$  Hz, 3H), 1.01 (d,  $J = 3.7$  Hz, 6H).  $^{13}C$  NMR (100 MHz,  $CDCl_3$ )  $\delta$  173.15, 172.39, 145.18, 135.02, 129.26, 128.16, 127.72, 126.54, 126.17, 122.66, 118.68, 105.92, 63.83, 60.99, 51.24, 36.80, 35.72, 32.53, 28.87, 24.36, 23.64, 14.43. **HRMS (ESI)** calcd for  $C_{24}H_{35}N_2O_3$   $[M+H]^+$  399.5545, found 399.5552.

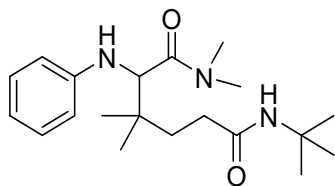

**N<sup>6</sup>-(tert-butyl)-N<sup>1</sup>,N<sup>1</sup>,3,3-tetramethyl-2-(phenylamino)hexanediamide (3t).**

Yellow oil (74%, 25.7mg) ;  $R_f = 0.40$  (petroleum ether/ethyl acetate = 5:1); <sup>1</sup>H NMR (400 MHz, CDCl<sub>3</sub>) δ 7.19 – 7.08 (m, 2H), 6.70 (d,  $J = 7.3$  Hz, 1H), 6.66 (d,  $J = 8.0$  Hz, 2H), 5.28 (s, 1H), 4.23 (s, 1H), 3.10 (d,  $J = 1.9$  Hz, 3H), 2.91 (d,  $J = 1.9$  Hz, 3H), 2.17 – 2.07 (m, 2H), 1.88 – 1.69 (m, 2H), 1.31 (d,  $J = 1.9$  Hz, 9H), 1.02 (d,  $J = 17.2$  Hz, 6H). <sup>13</sup>C NMR (100 MHz, CDCl<sub>3</sub>) δ 173.06, 172.63, 148.23, 129.52, 118.43, 114.27, 59.64, 51.22, 38.43, 38.38, 35.79, 35.50, 32.87, 28.92, 23.29, 23.16. HRMS (ESI) calcd for C<sub>20</sub>H<sub>34</sub>N<sub>3</sub>O<sub>2</sub> [M+H]<sup>+</sup> 348.5105, found 348.5110.

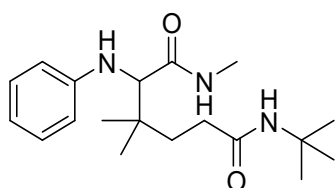

**N<sup>6</sup>-(tert-butyl)-N<sup>1</sup>,3,3-trimethyl-2-(phenylamino)hexanediamide (3u).**

Yellow oil (99%, 33.0mg) ;  $R_f = 0.40$  (petroleum ether/ethyl acetate = 5:1); <sup>1</sup>H NMR (400 MHz, CDCl<sub>3</sub>) δ 7.17 (t,  $J = 7.7$  Hz, 2H), 6.97 (q,  $J = 5.0$  Hz, 1H), 6.78 (t,  $J = 7.3$  Hz, 1H), 6.62 (d,  $J = 7.9$  Hz, 2H), 5.91 (s, 1H), 4.95 (s, 2H), 3.52 (s, 1H), 2.76 (d,  $J = 4.9$  Hz, 3H), 2.41 – 2.26 (m, 1H), 2.09 – 2.00 (m, 1H), 1.81 – 1.73 (m, 2H), 1.32 (s, 9H), 1.05 (s, 6H). <sup>13</sup>C NMR (100 MHz, CDCl<sub>3</sub>) δ 173.33, 172.79, 147.22, 129.50, 119.17, 113.89, 65.98, 51.28, 36.77, 36.25, 32.56, 28.81, 26.13, 24.92, 24.68. HRMS (ESI) calcd for C<sub>19</sub>H<sub>32</sub>N<sub>3</sub>O<sub>2</sub> [M+H]<sup>+</sup> 334.4835, found 334.4830.

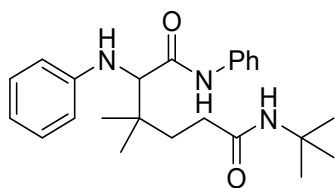

**N<sup>6</sup>-(tert-butyl)-3,3-dimethyl-N<sup>1</sup>-phenyl-2-(phenylamino)hexanediamide (3v).**

Yellow oil (78%, 30.9mg) ;  $R_f = 0.30$  (petroleum ether/ethyl acetate = 5:1); <sup>1</sup>H NMR (400 MHz, CDCl<sub>3</sub>) δ 8.93 (s, 1H), 7.49 – 7.40 (m, 2H), 7.26 – 7.16 (m, 2H), 7.16 – 7.08 (m, 2H), 7.01 (t,  $J = 7.6$  Hz, 1H), 6.73 (t,  $J = 7.3$  Hz, 1H), 6.67 – 6.58 (m, 2H), 5.73 (s, 1H), 3.54 (s, 1H), 2.37 – 1.98 (m, 2H), 1.86 – 1.67 (m, 2H), 1.27 (s, 9H), 1.04 (d,  $J = 3.8$  Hz, 6H). <sup>13</sup>C NMR (100 MHz, CDCl<sub>3</sub>) δ 172.96, 170.61, 147.28, 137.59, 129.58, 129.01, 124.49, 120.15, 119.55, 114.19, 66.58, 51.30, 37.31, 36.07, 32.64, 28.86, 25.20, 24.78. HRMS (ESI) calcd for C<sub>24</sub>H<sub>34</sub>N<sub>3</sub>O<sub>2</sub> [M+H]<sup>+</sup> 396.5545, found 396.5543.

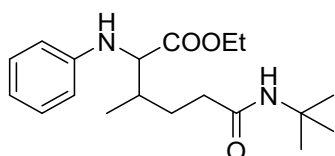

**Ethyl 6-(tert-butylamino)-3-methyl-6-oxo-2-(phenylamino)hexanoate (3w).**

Yellow oil (91%, 30.4mg) ; 1:1 d.r ;  $R_f = 0.35$  (petroleum ether/ethyl acetate = 5:1);  $^1\text{H NMR}$  (400 MHz,  $\text{CDCl}_3$ )  $\delta$  7.15 (ddd,  $J = 9.0, 7.2, 1.9$  Hz, 2H), 6.74 – 6.69 (m, 1H), 6.65 – 6.58 (m, 2H), 5.39 – 5.21 (m, 1H), 4.20 – 4.13 (m, 2H), 3.98 – 3.88 (m, 1H), 2.24 – 2.06 (m, 2H), 2.02 – 1.78 (m, 2H), 1.62 – 1.51 (m, 1H), 1.32 (d,  $J = 10.7$  Hz, 9H), 1.25 – 1.21 (m, 3H), 1.03 – 0.97 (m, 3H).  $^{13}\text{C NMR}$  (100 MHz,  $\text{CDCl}_3$ )  $\delta$  173.54, 171.94 (d,  $J = 2.6$  Hz), 147.27 (d,  $J = 22.1$  Hz), 129.40 (d,  $J = 2.0$  Hz), 118.32 (d,  $J = 15.4$  Hz), 113.66 (d,  $J = 8.0$  Hz), 61.36 (d,  $J = 43.5$  Hz), 60.93 (d,  $J = 25.5$  Hz), 51.25 (d,  $J = 4.6$  Hz), 35.85 (d,  $J = 20.6$  Hz), 35.13 (d,  $J = 22.8$  Hz), 29.19 (d,  $J = 15.9$  Hz), 28.89 (d,  $J = 5.1$  Hz), 15.77 (d,  $J = 48.6$  Hz), 14.37 (d,  $J = 1.4$  Hz). **HRMS (ESI)** calcd for  $\text{C}_{19}\text{H}_{31}\text{N}_2\text{O}_3$   $[\text{M}+\text{H}]^+$  335.4675, found 335.4680.

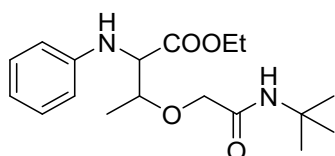

**Ethyl 3-(2-(tert-butylamino)-2-oxoethoxy)-2-(phenylamino)butanoate (3x).**

Yellow oil (81%, 27.3mg) ; 1:1 d.r ;  $R_f = 0.35$  (petroleum ether/ethyl acetate = 5:1);  $^1\text{H NMR}$  (400 MHz,  $\text{CDCl}_3$ )  $\delta$  7.21 – 7.14 (m, 2H), 6.81 – 6.71 (m, 1H), 6.65 (d,  $J = 8.0$  Hz, 2H), 6.59 – 6.49 (m, 1H), 4.26 – 4.17 (m, 2H), 4.12 – 3.97 (m, 2H), 3.91 – 3.70 (m, 2H), 1.32 (d,  $J = 3.2$  Hz, 9H), 1.28 – 1.24 (m, 6H).  $^{13}\text{C NMR}$  (100 MHz,  $\text{CDCl}_3$ )  $\delta$  172.00 (d,  $J = 67.0$  Hz), 168.67 (d,  $J = 6.3$  Hz), 146.91 (d,  $J = 66.2$  Hz), 129.52 (d,  $J = 3.3$  Hz), 119.00 (d,  $J = 13.8$  Hz), 113.94 (d,  $J = 9.8$  Hz), 77.75 (d,  $J = 44.0$  Hz), 69.22, 68.98, 61.56 (dd,  $J = 9.5, 4.8$  Hz), 51.02 (d,  $J = 3.5$  Hz), 28.82 (d,  $J = 3.2$  Hz), 16.42 (d,  $J = 43.2$  Hz), 14.38. **HRMS (ESI)** calcd for  $\text{C}_{18}\text{H}_{29}\text{N}_2\text{O}_4$   $[\text{M}+\text{H}]^+$  337.4395, found 337.4400.

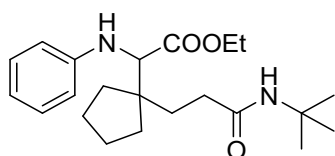

**Ethyl 2-(1-(3-(tert-butylamino)-3-oxopropyl)cyclopentyl)-2-(phenylamino)acetate (3y).**

Yellow oil (92%, 34.5mg) ;  $R_f = 0.40$  (petroleum ether/ethyl acetate = 5:1);  $^1\text{H NMR}$  (400 MHz,  $\text{CDCl}_3$ )  $\delta$  7.18 – 7.13 (m, 2H), 6.73 (t,  $J = 7.3$  Hz, 1H), 6.66 – 6.59 (m, 2H), 5.33 (s, 1H), 4.16 – 4.11 (m, 2H), 3.95 (s, 1H), 2.26 – 2.06 (m, 2H), 1.94 – 1.79 (m, 3H), 1.72 – 1.58 (m, 5H), 1.47 – 1.42 (m, 2H), 1.31 (s, 9H), 1.21 (t,  $J = 7.1$  Hz, 3H).  $^{13}\text{C NMR}$  (100 MHz,  $\text{CDCl}_3$ )  $\delta$  173.56, 172.39, 147.54, 129.44, 118.56, 113.73, 61.83, 60.98, 51.19, 48.24, 34.17, 33.97, 33.70, 33.01, 28.88, 25.56, 25.45, 14.36. **HRMS (ESI)** calcd for  $\text{C}_{22}\text{H}_{35}\text{N}_2\text{O}_3$   $[\text{M}+\text{H}]^+$  375.5325, found 375.5327.

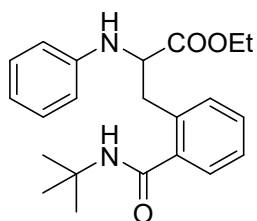

**Ethyl 3-(2-(tert-butylcarbamoyl)phenyl)-2-(phenylamino)propanoate (3z).**

Yellow oil (68%, 25.1mg) ;  $R_f = 0.25$  (petroleum ether/ethyl acetate = 5:1);  $^1\text{H NMR}$  (400 MHz,  $\text{CDCl}_3$ )  $\delta$  7.35 – 7.29 (m, 3H), 7.25 – 7.19 (m, 1H), 7.12 – 7.04 (m, 2H), 6.67 – 6.61 (m, 1H), 6.57 – 6.51 (m, 2H), 5.86 (s, 1H), 4.31 – 4.27 (m, 1H), 4.20 – 4.12 (m, 2H), 3.32 – 3.13 (m, 2H), 1.48 (s, 9H), 1.19 (t,  $J = 7.1$  Hz, 3H).  $^{13}\text{C NMR}$  (100 MHz,  $\text{CDCl}_3$ )  $\delta$  174.07, 169.70, 147.32, 138.33, 135.58, 130.74, 129.98, 129.17, 126.99, 126.92, 117.71, 113.30, 61.19, 59.09, 52.09, 36.19, 28.93, 14.27. **HRMS (ESI)** calcd for  $\text{C}_{22}\text{H}_{29}\text{N}_2\text{O}_3$   $[\text{M}+\text{H}]^+$  369.4845, found 369.4850.

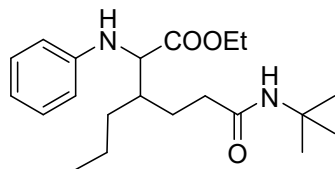

**Ethyl 6-(tert-butylamino)-6-oxo-2-(phenylamino)-3-propylhexanoate (3aa).**

Yellow oil (80%, 29.0 mg) ; 1:1 d.r ;  $R_f = 0.30$  (petroleum ether/ethyl acetate = 5:1);  $^1\text{H NMR}$  (400 MHz,  $\text{CDCl}_3$ )  $\delta$  7.20 – 7.11 (m, 2H), 6.72 (t,  $J = 7.3$  Hz, 1H), 6.66 – 6.58 (m, 2H), 5.25 (s, 1H), 4.20 – 4.14 (m, 2H), 4.01 (d,  $J = 5.4$  Hz, 1H), 2.18 – 2.15 (m, 2H), 1.91 – 1.79 (m, 2H), 1.73 – 1.71 (m, 2H), 1.49 – 1.38 (m, 3H), 1.23 (t,  $J = 7.2$  Hz, 3H), 0.89 (t,  $J = 6.7$  Hz, 3H).  $^{13}\text{C NMR}$  (100 MHz,  $\text{CDCl}_3$ )  $\delta$  173.86, 172.01, 147.40, 129.45, 118.38, 113.71, 61.14, 59.40, 51.33, 40.55, 35.11, 32.77, 28.96, 26.26, 20.34, 14.40, 14.37. **HRMS (ESI)** calcd for  $\text{C}_{21}\text{H}_{35}\text{N}_2\text{O}_3$   $[\text{M}+\text{H}]^+$  363.5215, found 363.5210.

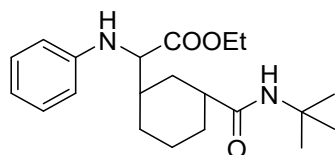

**Ethyl 2-(3-(tert-butylcarbamoyl)cyclohexyl)-2-(phenylamino)acetate (3ab).**

Yellow oil (86%, 31.0mg);  $R_f = 0.35$  (petroleum ether/ethyl acetate = 5:1);  $^1\text{H NMR}$  (400 MHz,  $\text{CDCl}_3$ )  $\delta$  7.16 (t,  $J = 7.7$  Hz, 2H), 6.72 (t,  $J = 7.3$  Hz, 1H), 6.68 – 6.55 (m, 2H), 5.32 – 5.13 (m, 1H), 4.22 – 4.13 (m, 2H), 3.94 – 3.88 (m, 1H), 2.59 – 2.17 (m, 1H), 2.15 – 1.94 (m, 2H), 1.93 – 1.78 (m, 3H), 1.77 – 1.59 (m, 2H), 1.45 (d,  $J = 29.4$  Hz, 2H), 1.32 (dd,  $J = 5.9, 3.2$  Hz, 9H), 1.24 – 1.18 (m, 3H).  $^{13}\text{C NMR}$  (100 MHz,  $\text{CDCl}_3$ )  $\delta$  174.80 (d,  $J = 8.2$  Hz), 174.21 (dd,  $J = 51.5, 13.4$  Hz), 173.46 (d,  $J = 11.7$  Hz), 147.61 – 147.10 (m), 129.45 (d,  $J = 2.9$  Hz), 118.55 – 118.28 (m), 113.70 (dd,  $J = 7.4, 5.0$  Hz), 61.85 (d,  $J = 15.7$  Hz), 61.17, 51.10 (d,  $J = 4.3$  Hz), 46.26, 40.78 (d,  $J = 2.8$  Hz), 32.28 (d,  $J = 38.8$  Hz), 30.94 (d,  $J = 88.5$  Hz), 29.52 (d,  $J = 13.5$  Hz), 28.95

(d,  $J = 2.5$  Hz), 25.41 (d,  $J = 6.9$  Hz), 14.42. **HRMS (ESI)** calcd for  $C_{21}H_{33}N_2O_3$   $[M+H]^+$  361.5055, found 361.5050.

Note: d.r. cannot be determined by NMR and chiral HPLC (CHIRALCEL O-DH, CHIRALPAK IA, IB, IC, and AD-H columns).

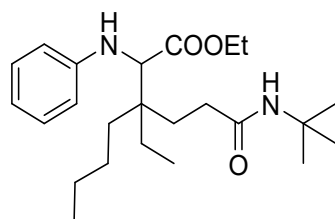

**Ethyl 3-(3-(tert-butylamino)-3-oxopropyl)-3-ethyl-2-(phenylamino)heptanoate (3ac).**

Yellow oil (32%, 13.0mg); 1:1 d.r;  $R_f = 0.40$  (petroleum ether/ethyl acetate = 5:1);  $^1H$  NMR (400 MHz,  $CDCl_3$ )  $\delta$  7.19 – 7.12 (m, 2H), 6.73 (t,  $J = 7.3$  Hz, 1H), 6.66 – 6.60 (m, 2H), 5.30 (s, 1H), 4.17 – 4.09 (m, 2H), 3.96 (s, 1H), 2.23 – 2.04 (m, 2H), 1.79 – 1.71 (m, 2H), 1.55 – 1.41 (m, 4H), 1.31 (s, 9H), 1.22 (t,  $J = 7.1$  Hz, 3H), 0.93 – 0.88 (m, 6H).  $^{13}C$  NMR (100MHz,  $CDCl_3$ )  $\delta$  173.82 (d,  $J = 2.9$  Hz), 172.72, 147.66, 129.47, 118.58, 113.88 (d,  $J = 1.8$  Hz), 62.76 (d,  $J = 4.8$  Hz), 60.97, 51.19, 41.82, 34.67 (d,  $J = 15.0$  Hz), 32.52 (d,  $J = 3.7$  Hz), 28.94, 27.73, 27.44, 25.85 (d,  $J = 2.7$  Hz), 23.80 (d,  $J = 3.5$  Hz), 14.33, 14.20, 8.43 (d,  $J = 3.2$  Hz). **HRMS (ESI)** calcd for  $C_{24}H_{41}N_2O_3$   $[M+H]^+$  405.6025, found 405.6021.

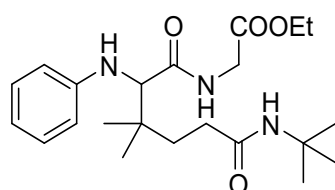

**Ethyl (6-(tert-butylamino)-3,3-dimethyl-6-oxo-2-(phenylamino)hexanoyl)glycinate (3ad).**

Yellow oil (80%, 32.4mg);  $R_f = 0.35$  (petroleum ether/ethyl acetate = 1:1);  $^1H$  NMR(400 MHz,  $CDCl_3$ )  $\delta$  7.32 (t,  $J = 5.8$  Hz, 1H), 7.22 – 7.14 (m, 2H), 6.79 (t,  $J = 7.3$  Hz, 1H), 6.69 – 6.57 (m, 2H), 5.73 (s, 1H), 4.18 – 4.12 (m, 3H), 3.87 – 3.81 (m, 1H), 3.53 (s, 1H), 2.40 – 2.28 (m, 1H), 2.07 – 2.00 (m, 1H), 1.84 – 1.72 (m, 2H), 1.32 (s, 9H), 1.25 – 1.21 (m, 3H), 1.10 (d,  $J = 2.4$  Hz, 6H).  $^{13}C$  NMR (100 MHz,  $CDCl_3$ )  $\delta$  172.89, 172.60, 169.79, 147.36, 129.53, 119.24, 113.90, 66.02, 61.52, 51.16, 41.29, 37.03, 36.16, 32.80, 28.87, 25.03, 24.81, 14.25. **HRMS (ESI)** calcd for  $C_{22}H_{36}N_3O_4$   $[M+H]^+$  405.5465, found 405.5470.

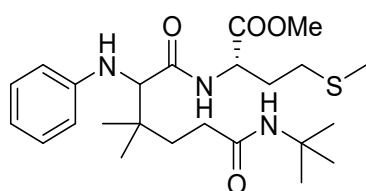

**Methyl (6-(tert-butylamino)-3,3-dimethyl-6-oxo-2-(phenylamino)hexanoyl)-L-**

**methioninate (3ae).**

Yellow oil (48%, 22.3 mg) ; 3:1 d.r  $R_f = 0.30$  (petroleum ether/ethyl acetate = 1:1);  $^1\text{H NMR}$  (400 MHz,  $\text{CDCl}_3$ )  $\delta$  7.32 (d,  $J = 8.4$  Hz, 1H), 7.22 – 7.15 (m, 2H), 6.79 (t,  $J = 7.2$  Hz, 1H), 6.65 – 6.59 (m, 2H), 5.73 (s, 1H), 4.75 – 4.69 (m, 1H), 3.72 (s, 3H), 3.55 – 3.53 (m, 1H), 2.48 – 2.27 (m, 2H), 2.21 – 2.17 (m, 2H), 2.05 – 2.01 (m, 2H), 1.87 (s, 3H), 1.81 – 1.76 (m, 2H), 1.32 (s, 9H), 1.10 (d,  $J = 1.6$  Hz, 6H).  $^{13}\text{C NMR}$  (100 MHz,  $\text{CDCl}_3$ )  $\delta$  172.80, 172.40, 172.05, 146.90, 129.56, 119.38, 113.70, 65.94, 52.58, 51.71, 51.16, 36.77, 36.35, 32.72, 31.12, 29.84, 28.88, 25.06, 24.88, 15.33. **HRMS (ESI)** calcd for  $\text{C}_{24}\text{H}_{40}\text{N}_3\text{O}_4\text{S}$   $[\text{M}+\text{H}]^+$  466.6605, found 466.6598.

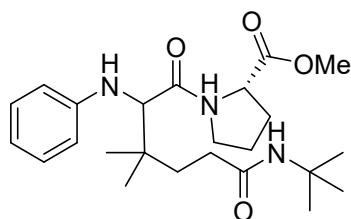**Methyl (2S)-1-(6-(tert-butylamino)-3,3-dimethyl-6-oxo-2-(phenylamino)hexanoyl)-1H-pyrrolidine-2-carboxylate (3af).**

Yellow oil (30%, 13.0mg) ; 10:1 d.r  $R_f = 0.30$  (petroleum ether/ethyl acetate = 1:1);  $^1\text{H NMR}$  (400 MHz,  $\text{CDCl}_3$ )  $\delta$  7.17 – 7.12 (m, 2H), 6.74 – 6.70 (m, 1H), 6.66 (d,  $J = 8.0$  Hz, 2H), 5.58 (s, 1H), 4.45 – 4.42 (m, 1H), 4.02 (s, 1H), 3.72 (s, 3H), 3.67 – 3.54 (m, 2H), 2.18 – 2.14 (m, 2H), 2.07 – 1.98 (m, 2H), 1.95 – 1.89 (m, 2H), 1.85 – 1.79 (m, 2H), 1.32 (s, 9H), 1.11 (s, 3H), 1.07 (s, 3H).  $^{13}\text{C NMR}$  (100 MHz,  $\text{CDCl}_3$ )  $\delta$  172.97, 172.91, 171.95, 148.08, 129.55, 118.45, 114.20, 62.16, 59.00, 52.37, 51.15, 48.14, 38.84, 35.58, 33.08, 29.84, 28.89, 25.25, 23.76, 22.87. **HRMS (ESI)** calcd for  $\text{C}_{24}\text{H}_{39}\text{N}_3\text{O}_4$   $[\text{M}+\text{H}]^+$  433.5925, found 433.5922.

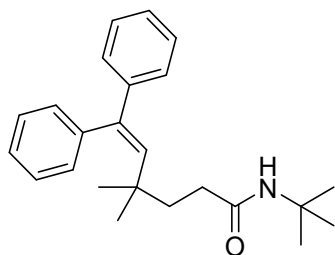**N-(tert-butyl)-4,4-dimethyl-6,6-diphenylhex-5-enamide (4a).**

White solid (90%, 31.4mg); m.p.: 94–97 °C;  $R_f = 0.60$  (petroleum ether/ethyl acetate = 5:1);  $^1\text{H NMR}$  (400 MHz,  $\text{CDCl}_3$ )  $\delta$  7.36 – 7.29 (m, 3H), 7.24 – 7.15 (m, 7H), 5.96 (s, 1H), 5.13 (s, 1H), 2.14 – 2.07 (m, 2H), 1.65 – 1.58 (m, 2H), 1.32 (s, 9H), 0.91 (s, 6H).  $^{13}\text{C NMR}$  (100 MHz,  $\text{CDCl}_3$ )  $\delta$  172.75, 144.03, 140.67, 140.46, 138.11, 130.27, 128.16, 127.99, 127.09, 127.02, 126.91, 51.18, 40.02, 36.96, 33.86, 29.14, 28.95. **HRMS (ESI)** calcd for  $\text{C}_{24}\text{H}_{32}\text{NO}$   $[\text{M}+\text{H}]^+$  350.5255, found 350.5260.

## 9. NMR Spectra

### $^1\text{H}$ NMR and $^{13}\text{C}$ NMR spectra for compound 3a ( $\text{CDCl}_3$ ).

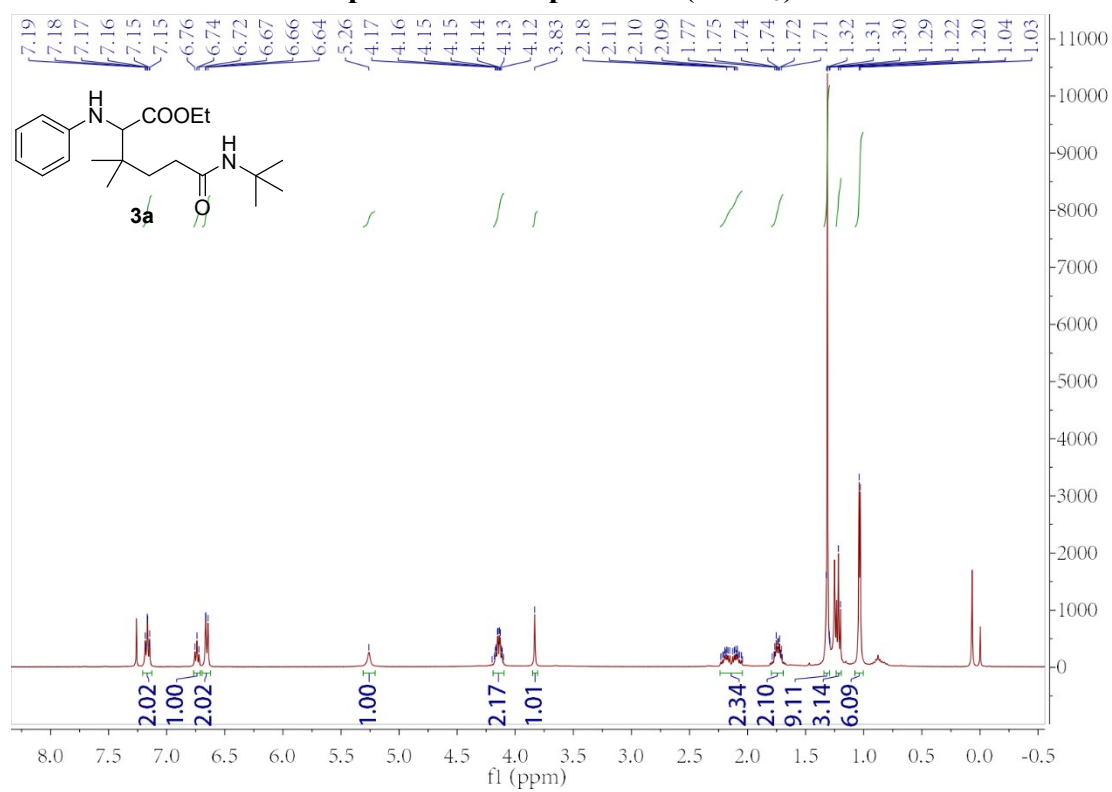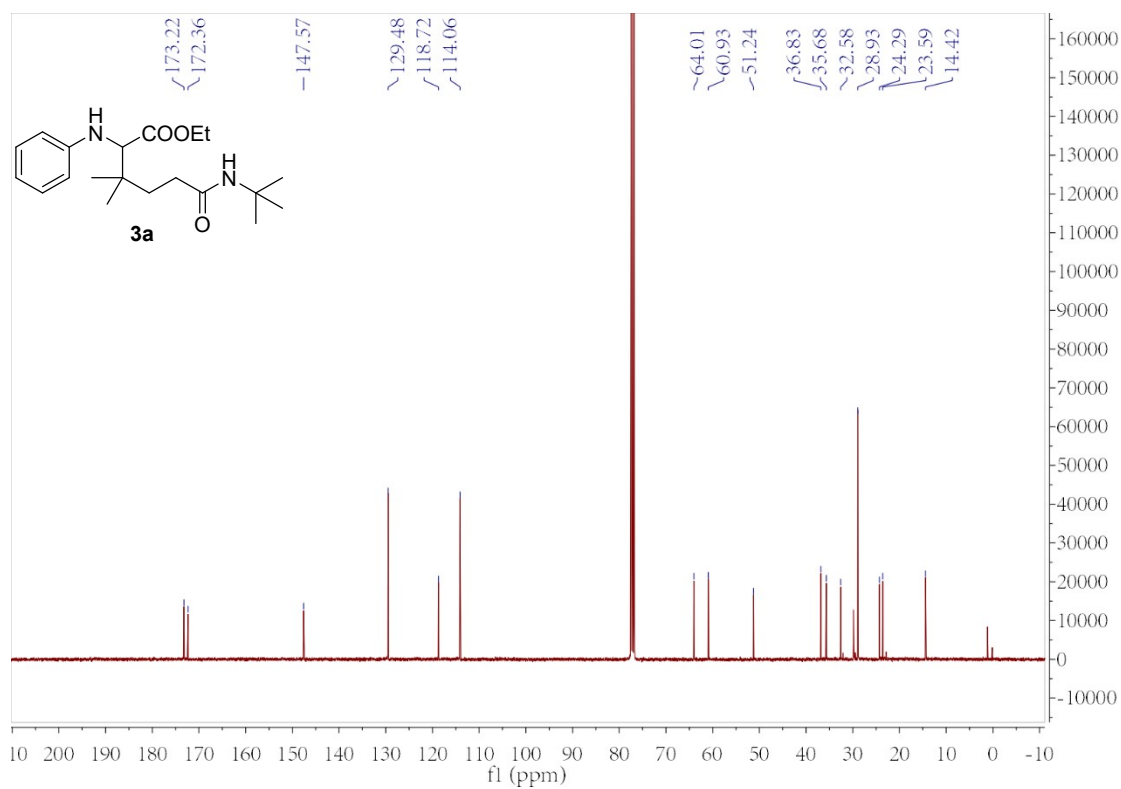

### $^1\text{H}$ NMR and $^{13}\text{C}$ NMR spectra for compound 3b ( $\text{CDCl}_3$ ).

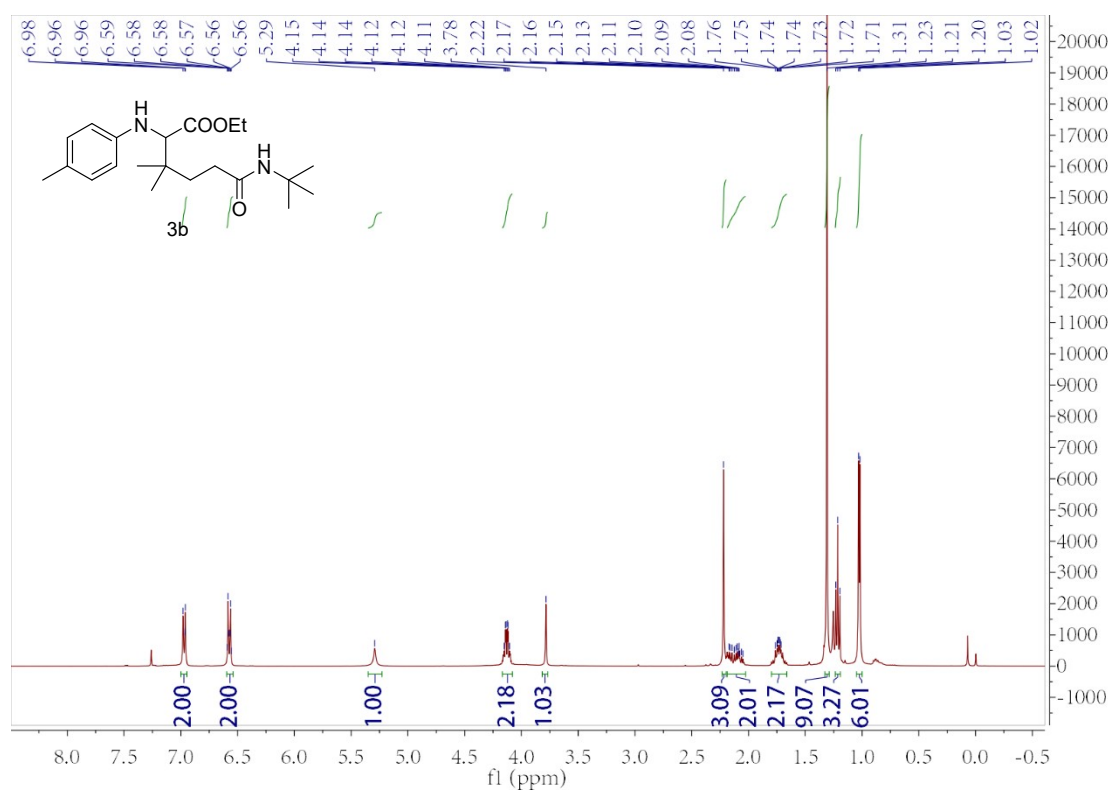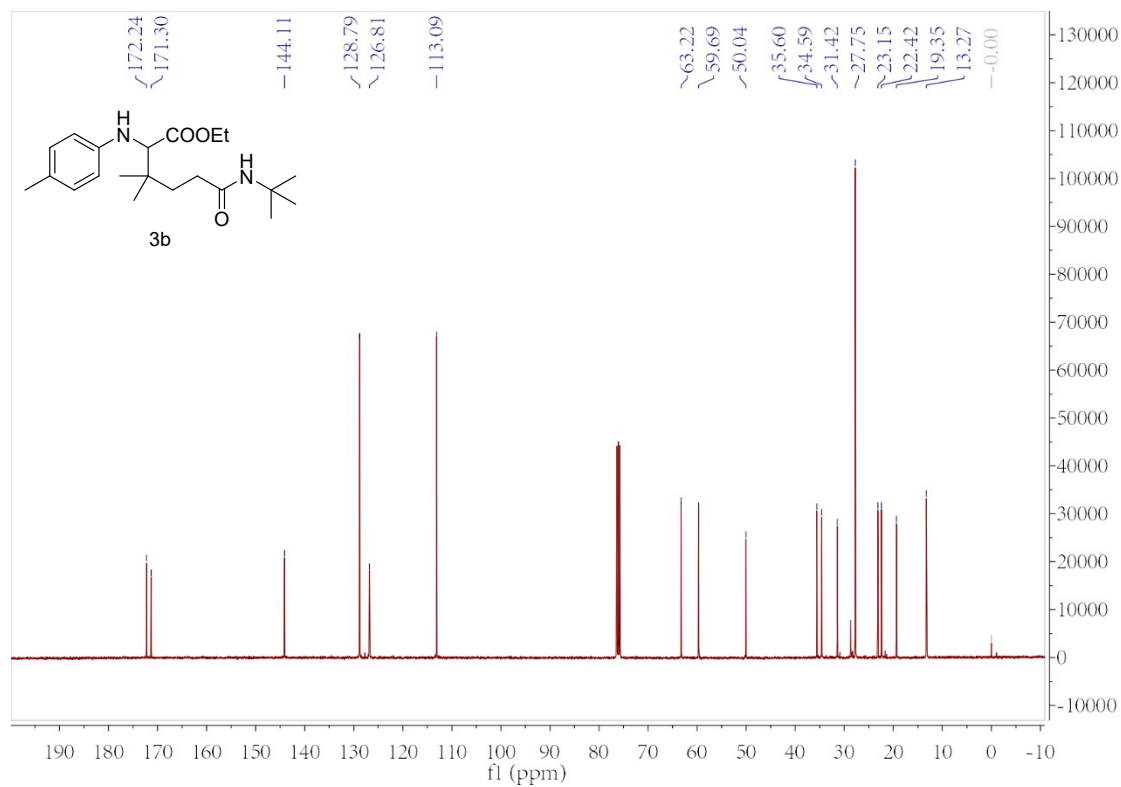

**<sup>1</sup>H NMR and <sup>13</sup>C NMR spectra for compound 3c (CDCl<sub>3</sub>).**



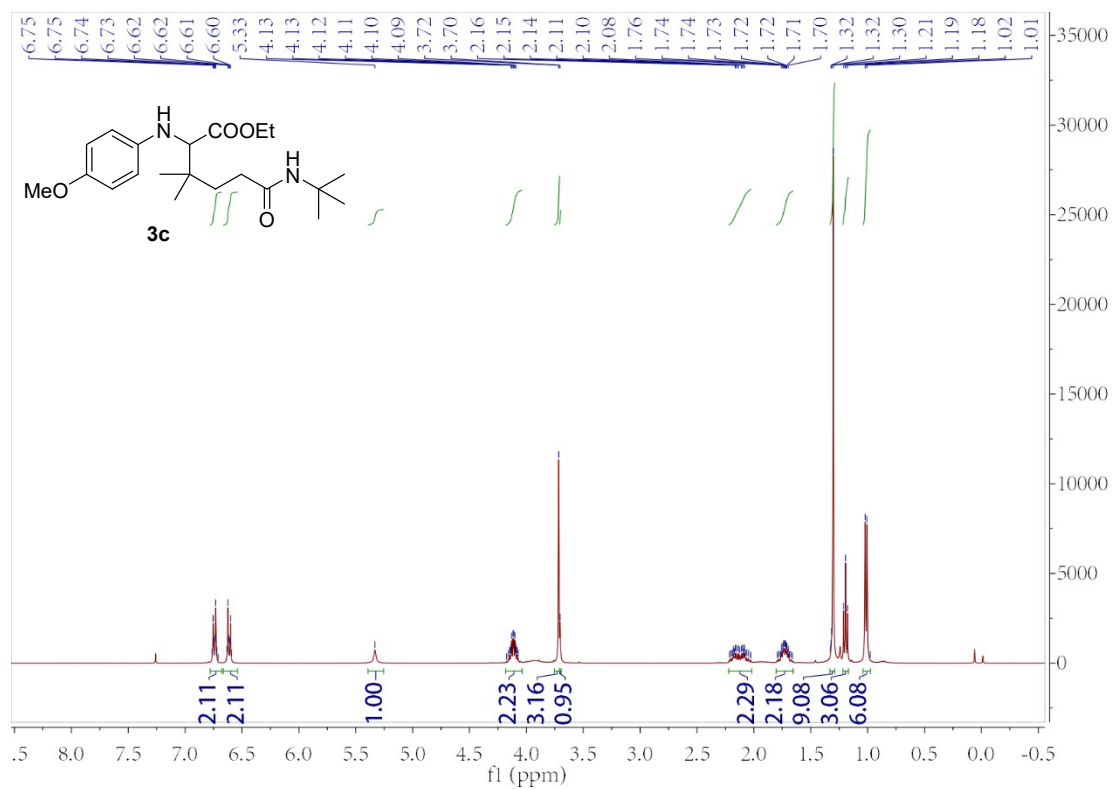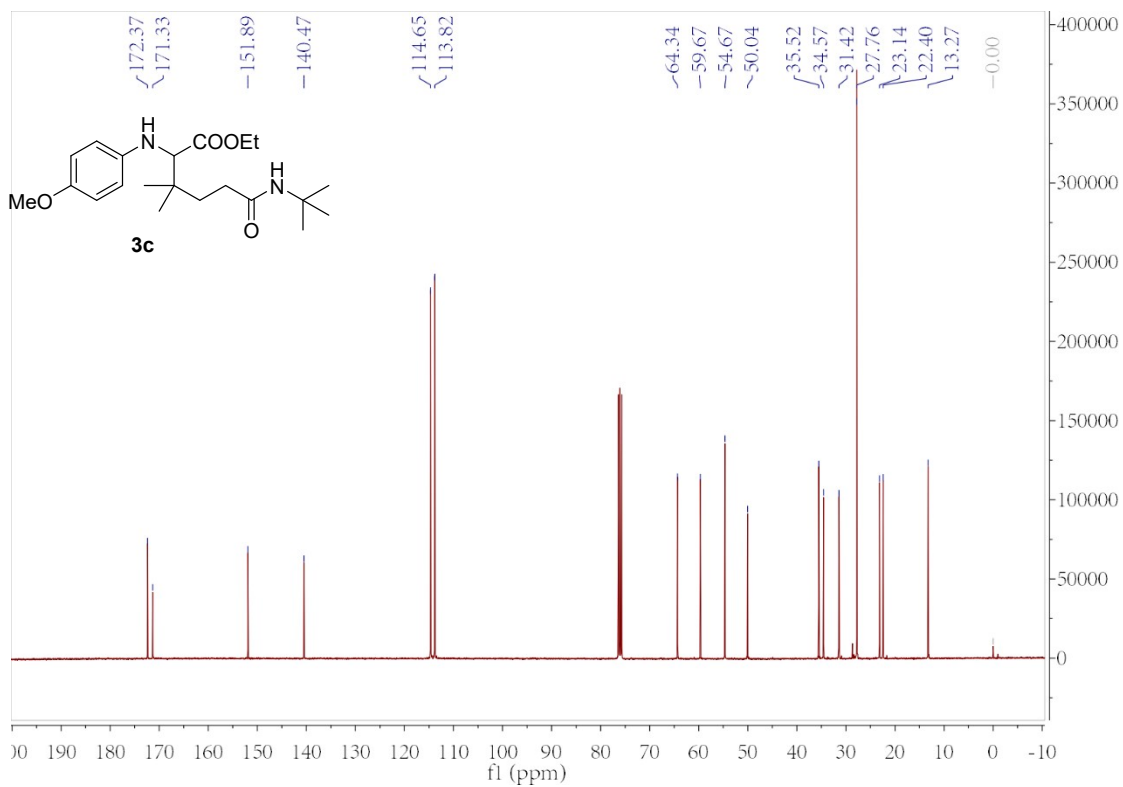

**<sup>1</sup>H NMR and <sup>13</sup>C NMR spectra for compound 3d (CDCl<sub>3</sub>).**

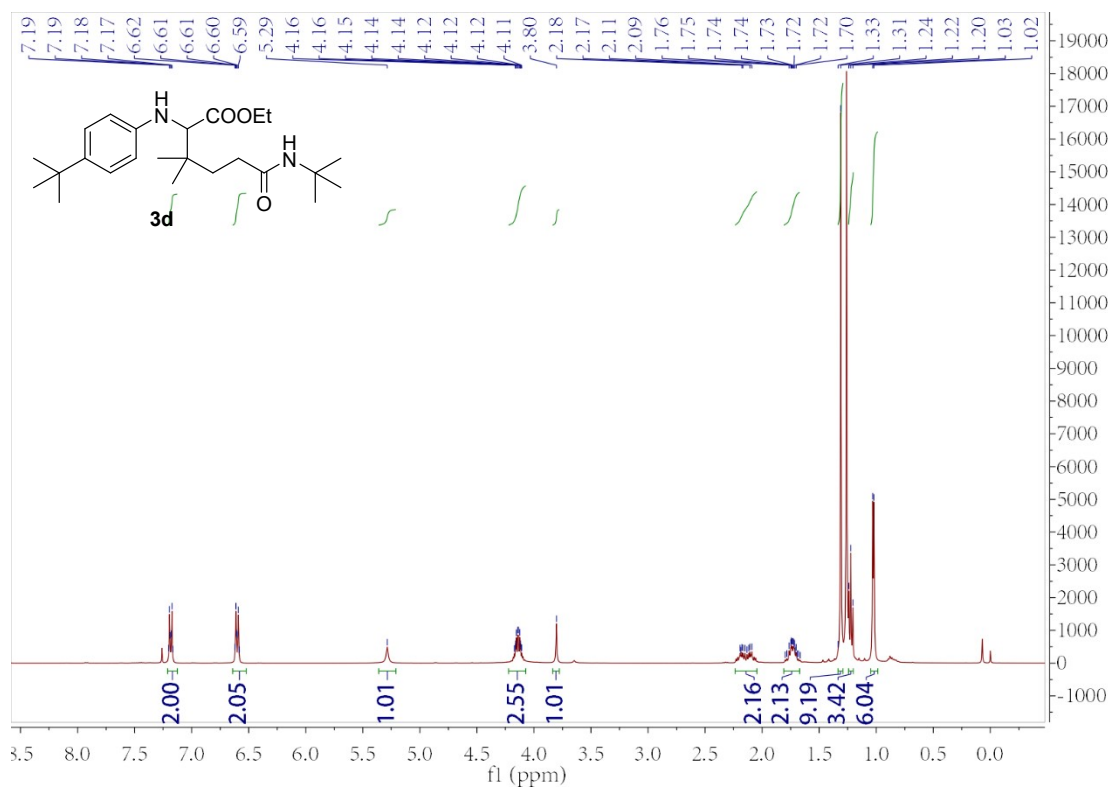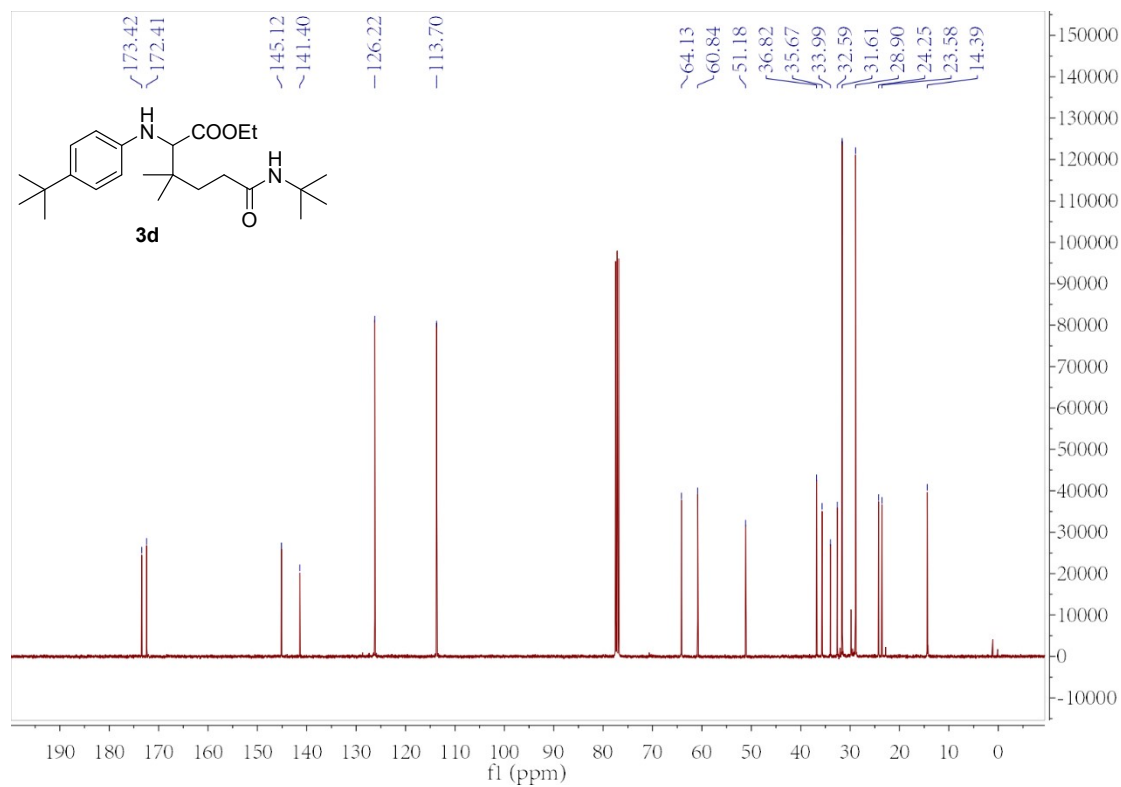

**<sup>1</sup>H, <sup>13</sup>C NMR and <sup>19</sup>F spectra for compound 3e (CDCl<sub>3</sub>).**

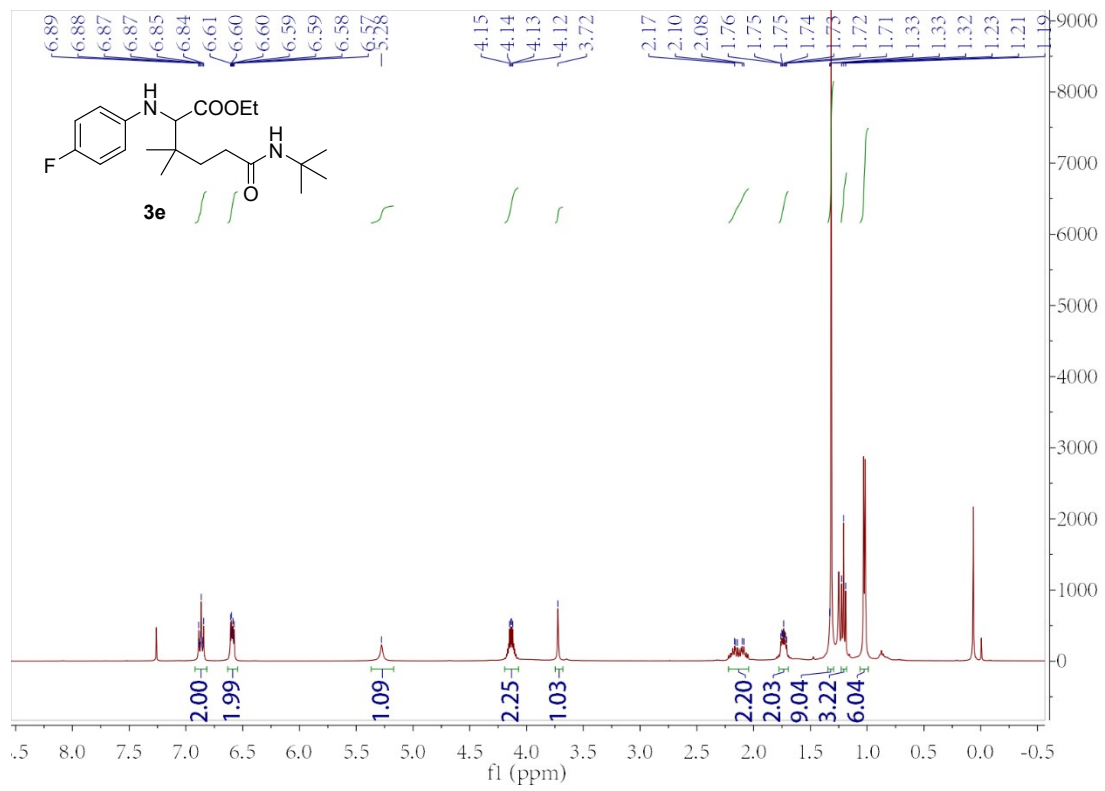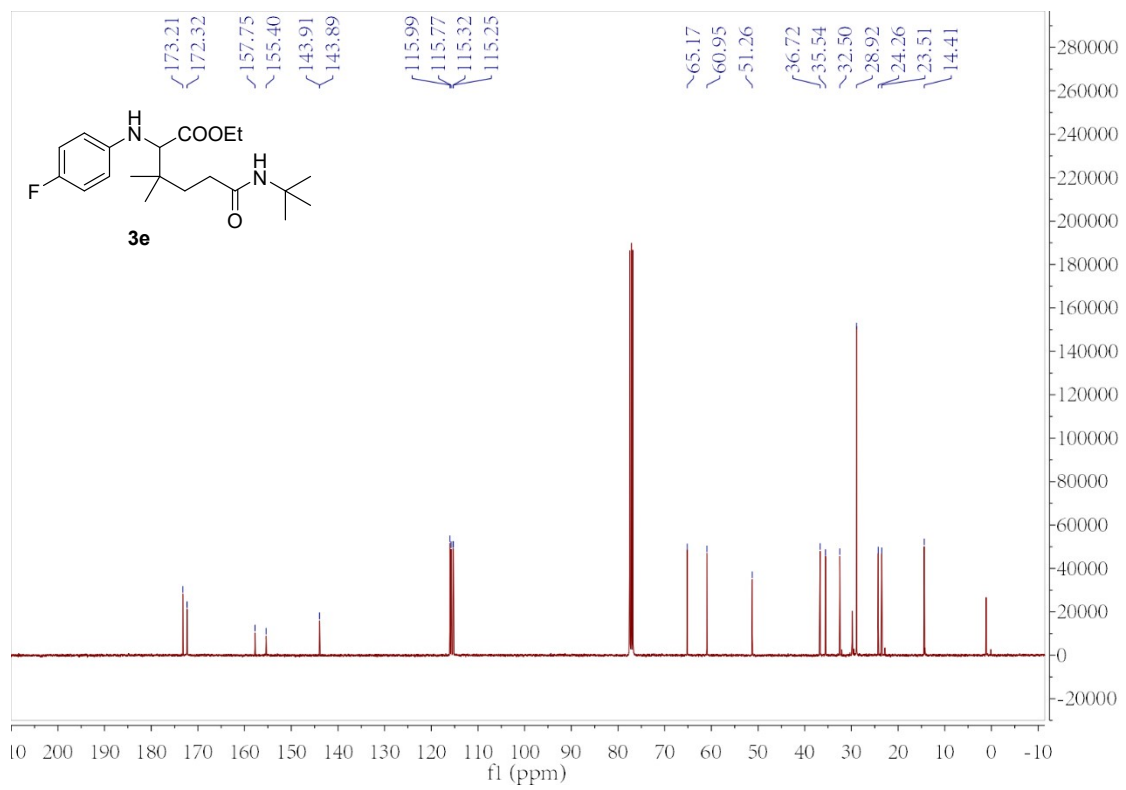

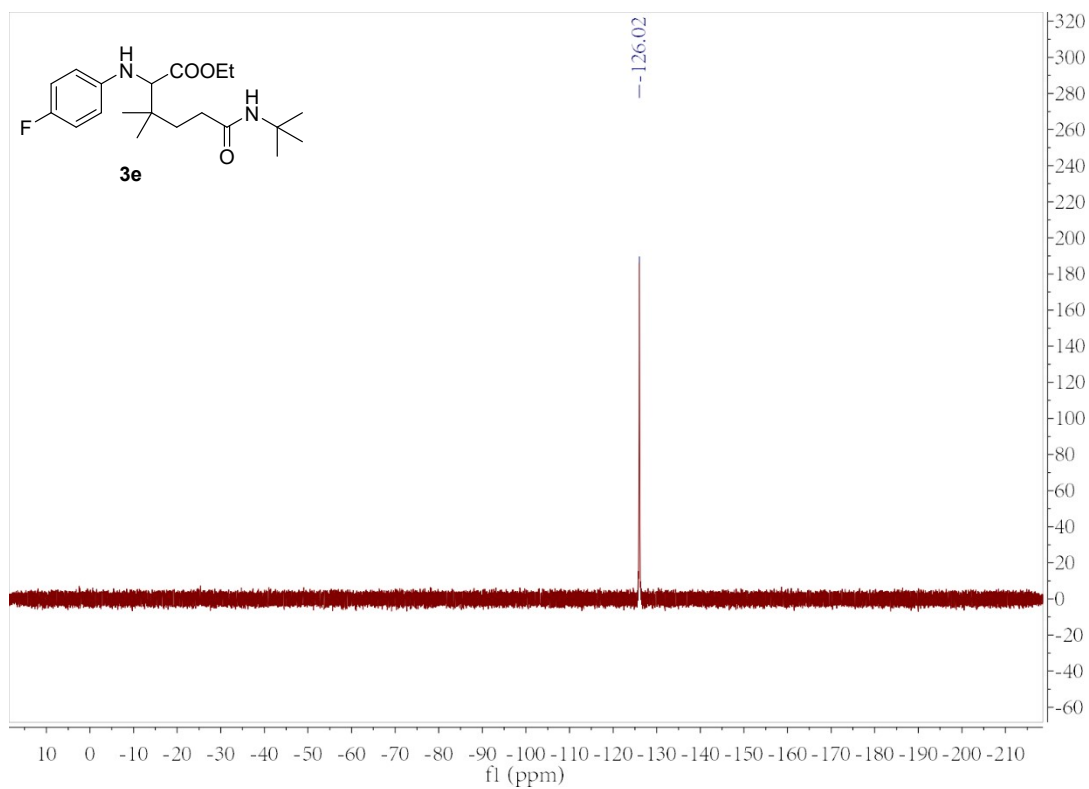

**$^1\text{H}$  NMR and  $^{13}\text{C}$  NMR spectra for compound 3f (CDCl<sub>3</sub>).**

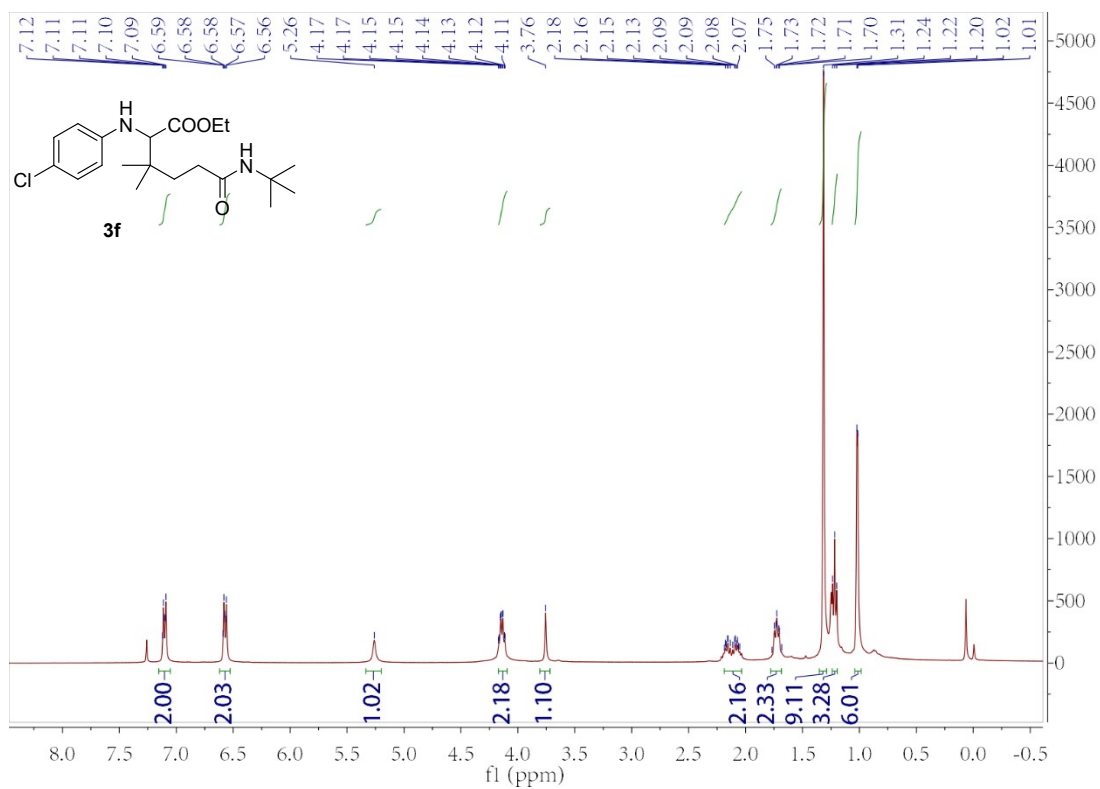

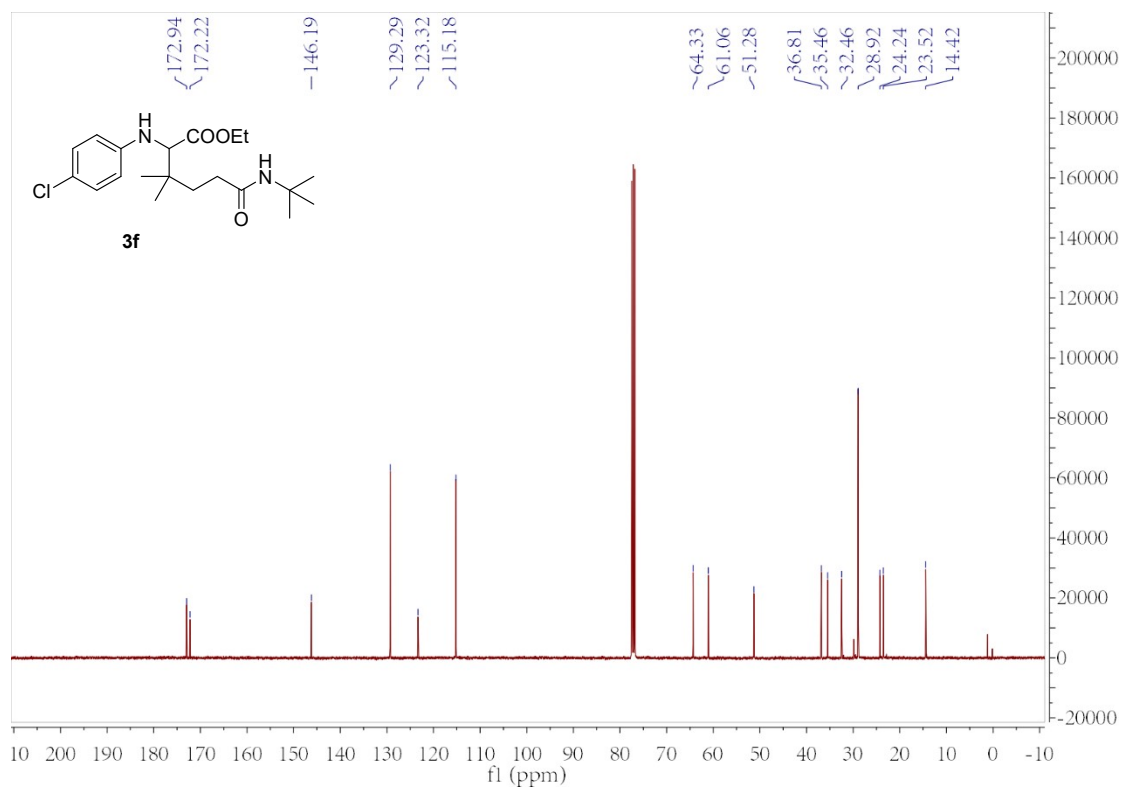

**<sup>1</sup>H NMR and <sup>13</sup>C NMR spectra for compound 3g (CDCl<sub>3</sub>).**

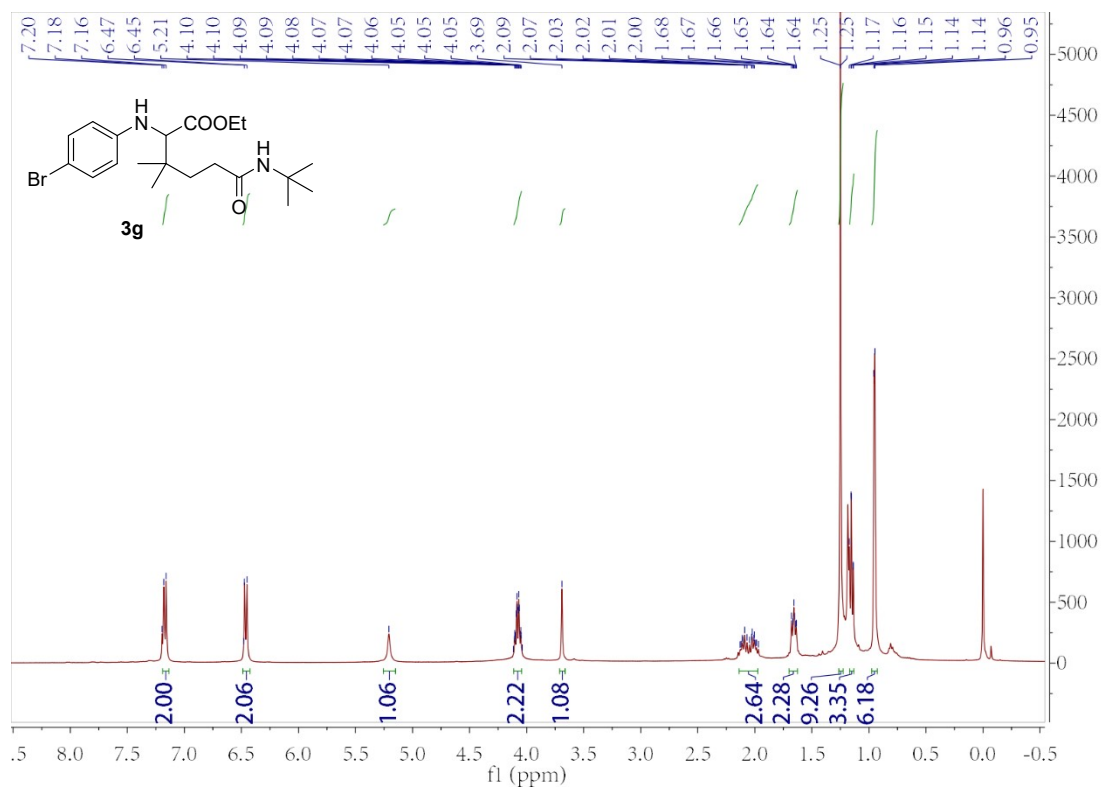

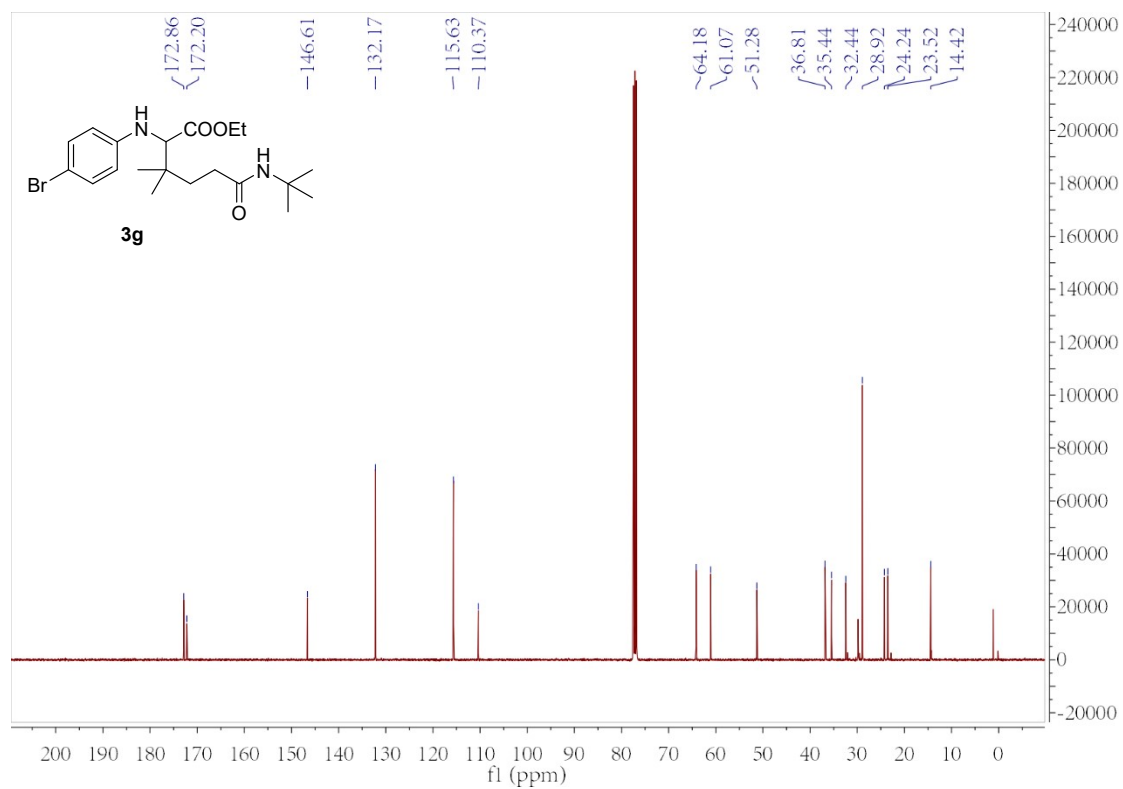

**$^1\text{H}$  NMR and  $^{13}\text{C}$  NMR spectra for compound 3h ( $\text{CDCl}_3$ ).**

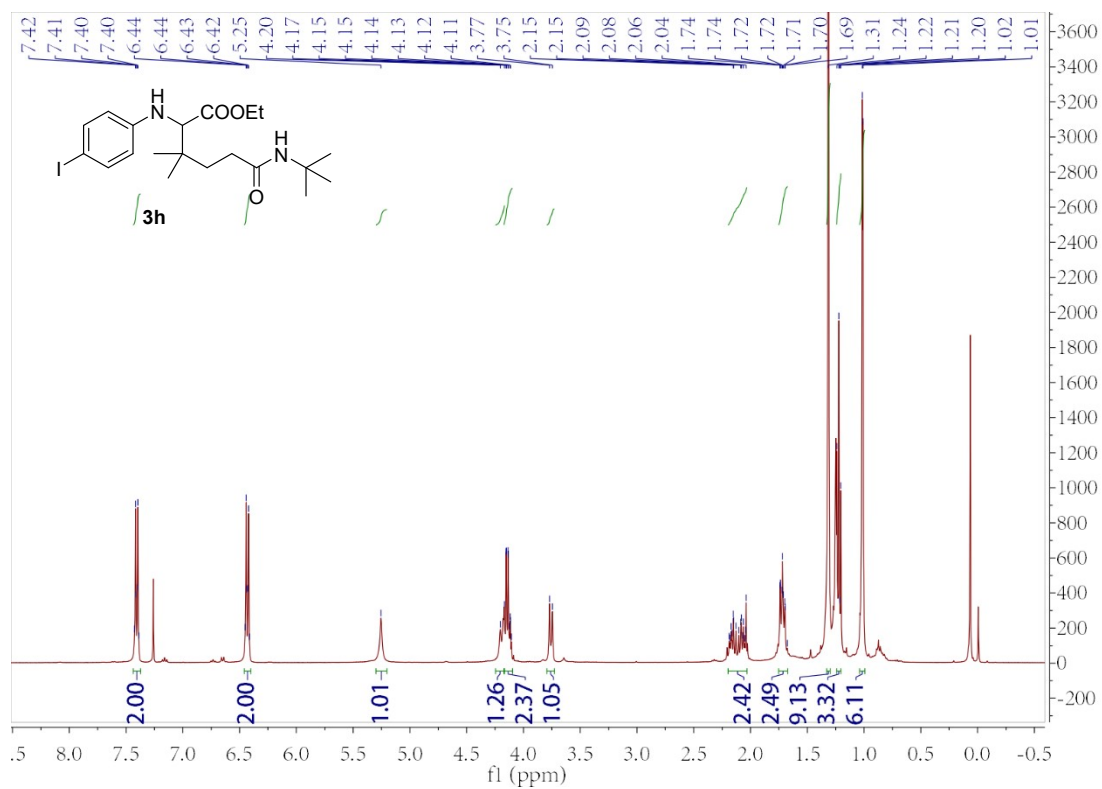

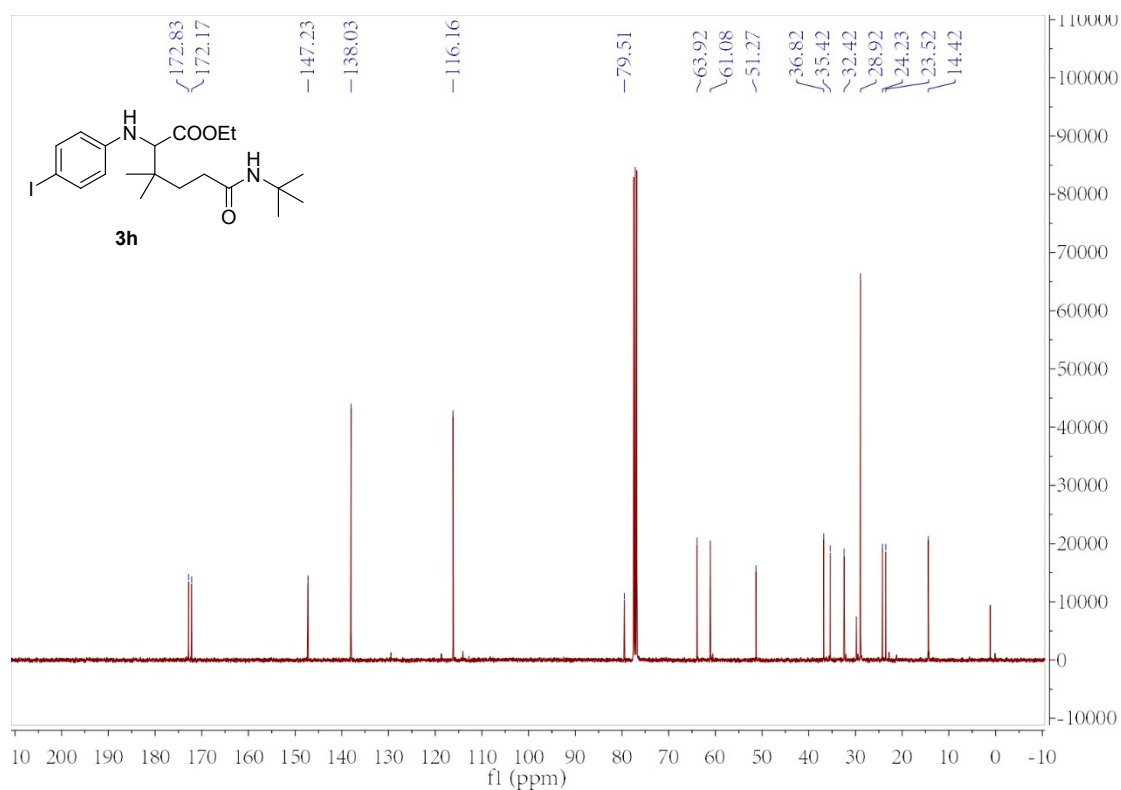

**$^1\text{H}$ ,  $^{13}\text{C}$  NMR and  $^{19}\text{F}$  spectra for compound 3i ( $\text{CDCl}_3$ ).**

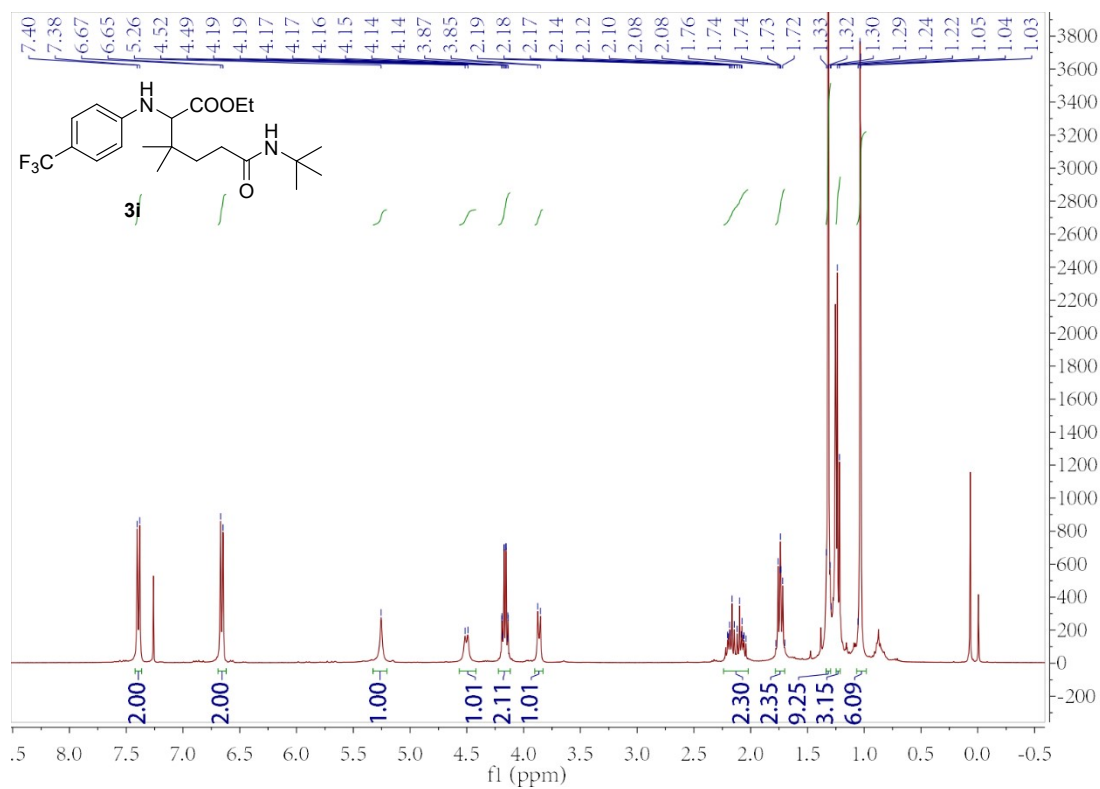

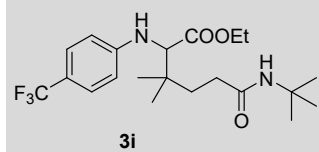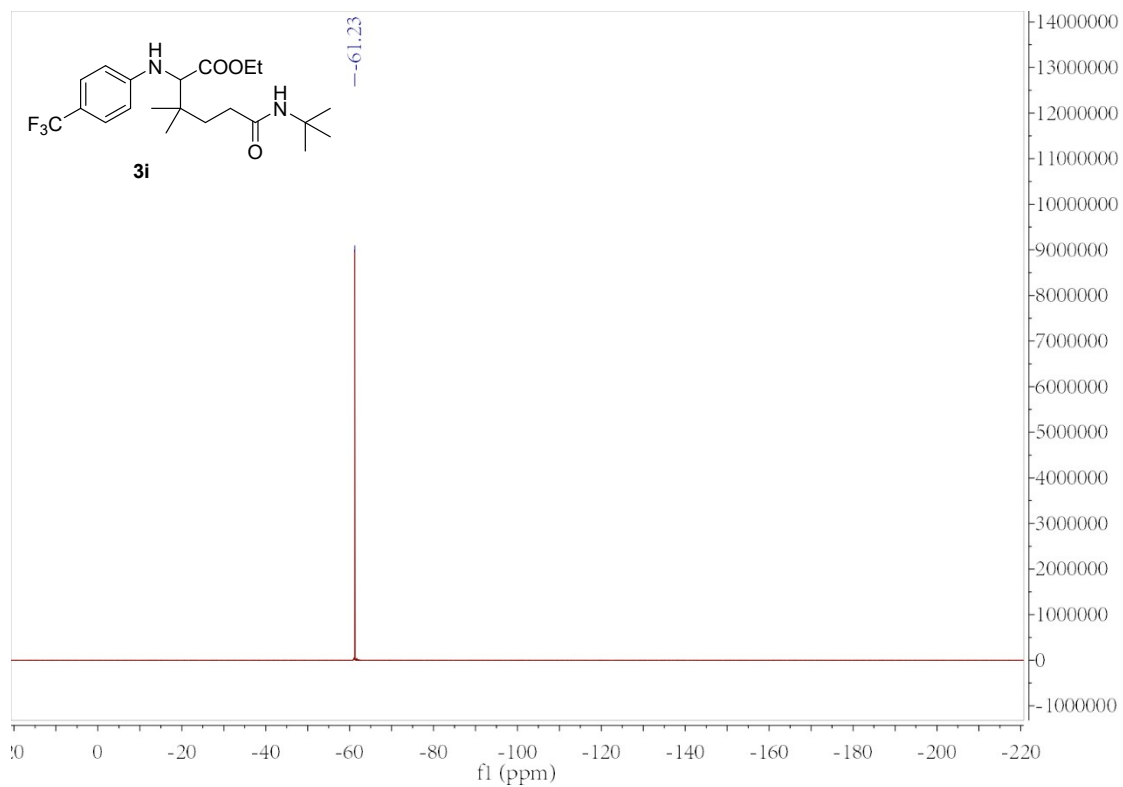

$^1\text{H}$  NMR and  $^{13}\text{C}$  NMR spectra for compound **3j** ( $\text{CDCl}_3$ ).



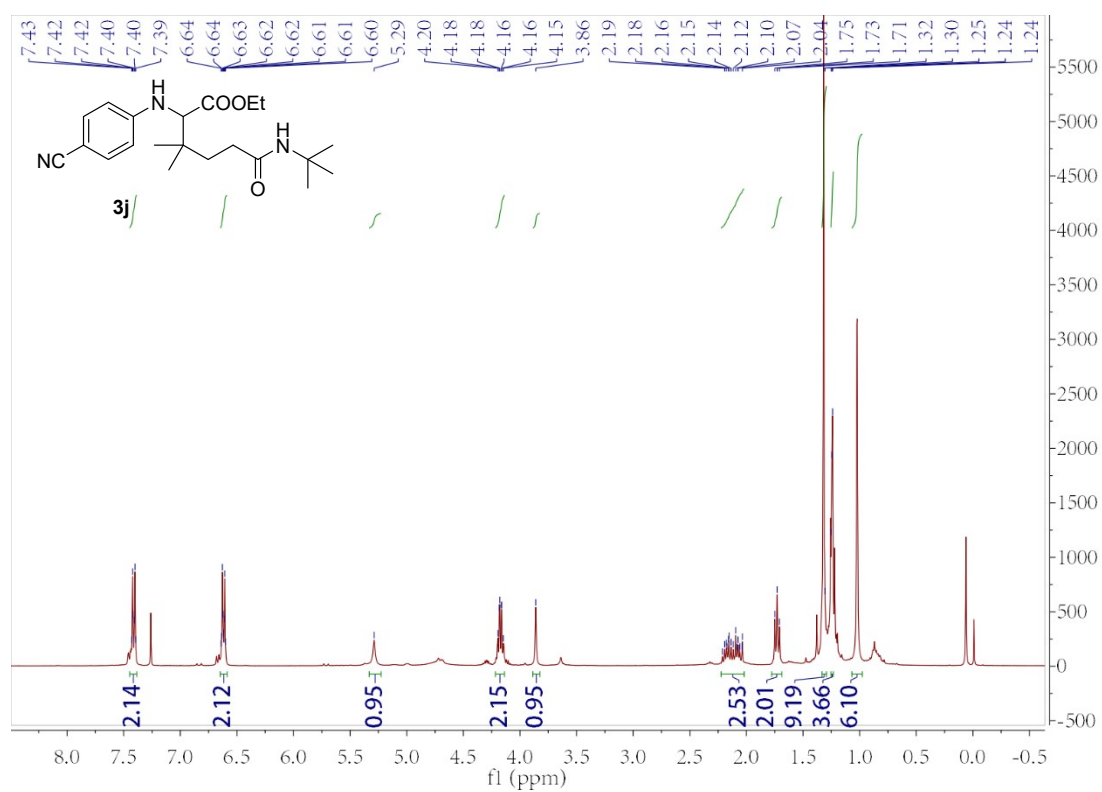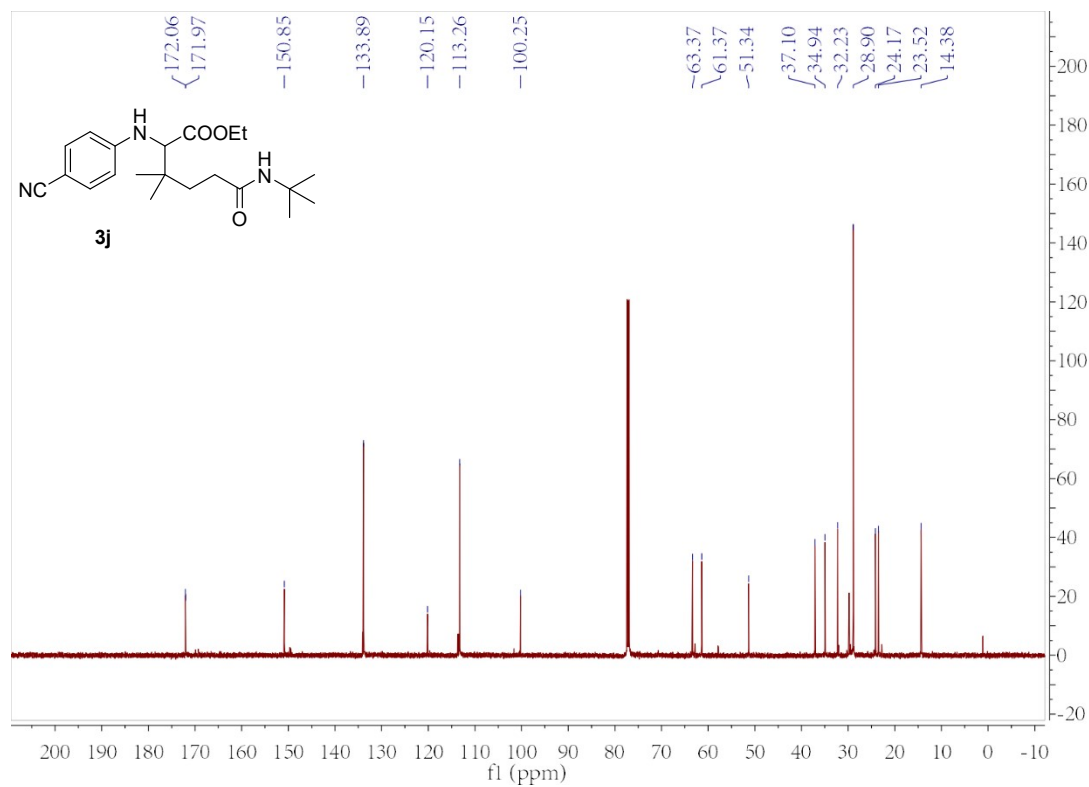

**<sup>1</sup>H NMR and <sup>13</sup>C NMR spectra for compound 3k (CDCl<sub>3</sub>).**

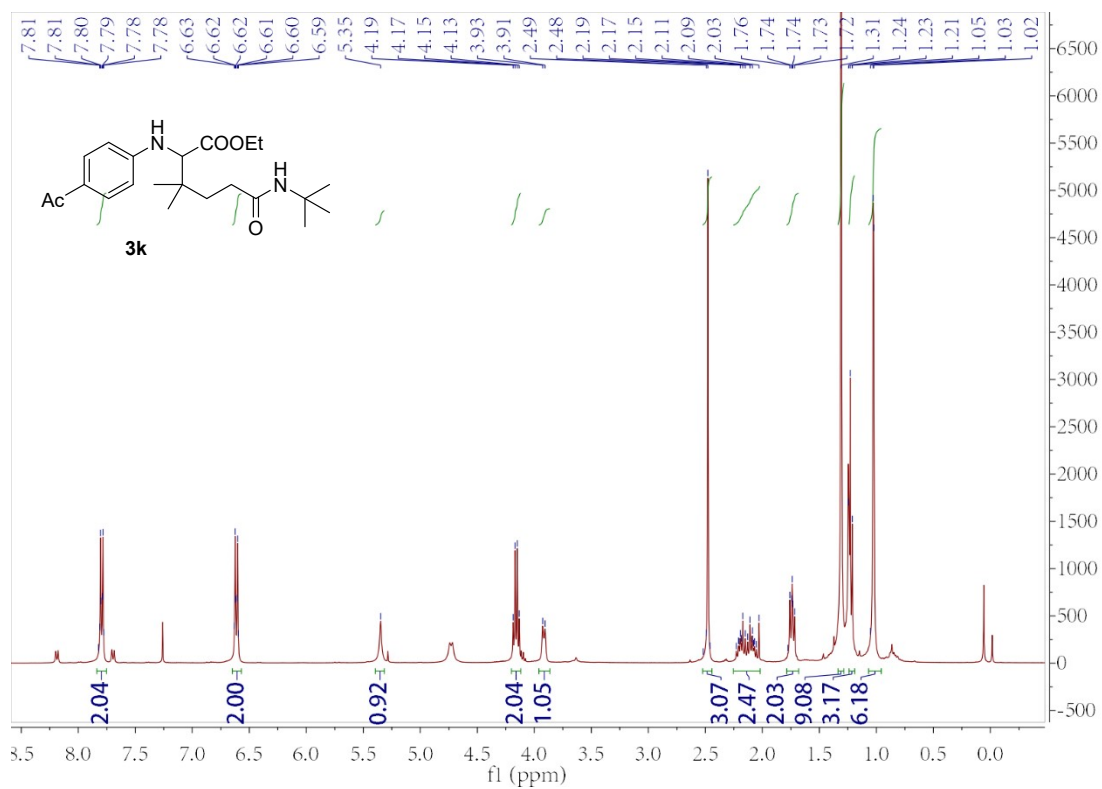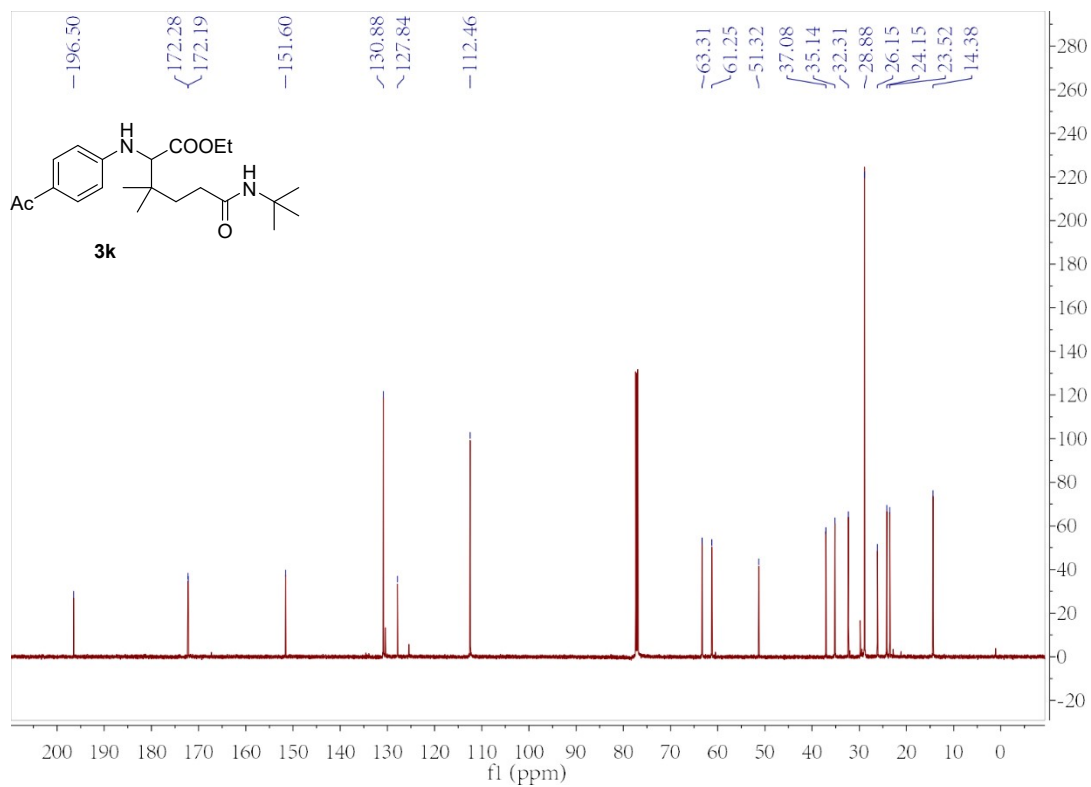

**<sup>1</sup>H NMR and <sup>13</sup>C NMR spectra for compound 3l (CDCl<sub>3</sub>).**

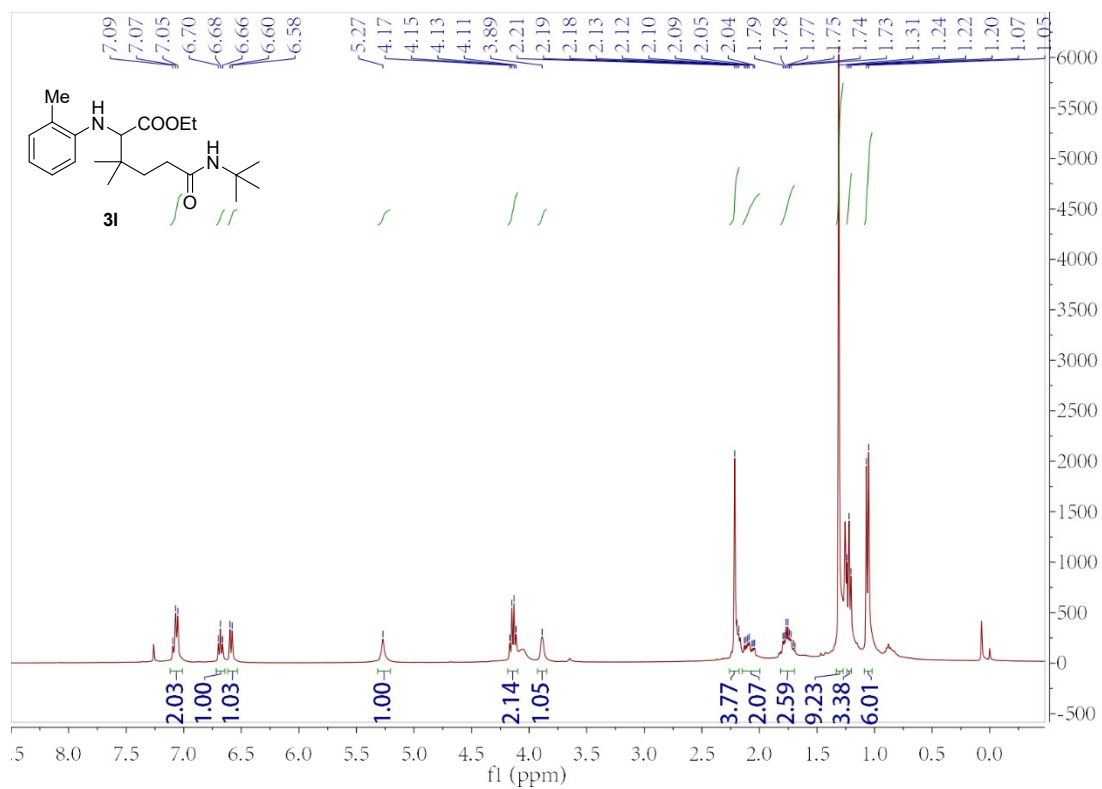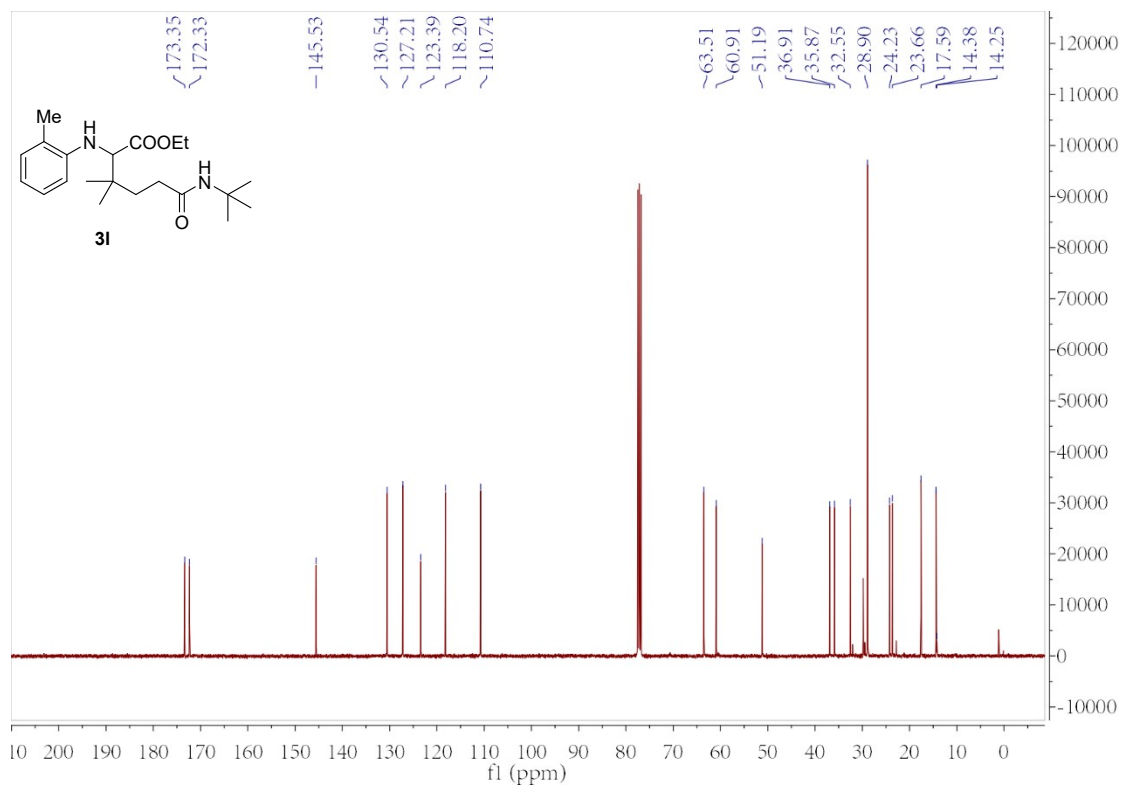

**<sup>1</sup>H NMR and <sup>13</sup>C NMR spectra for compound 3m (CDCl<sub>3</sub>).**

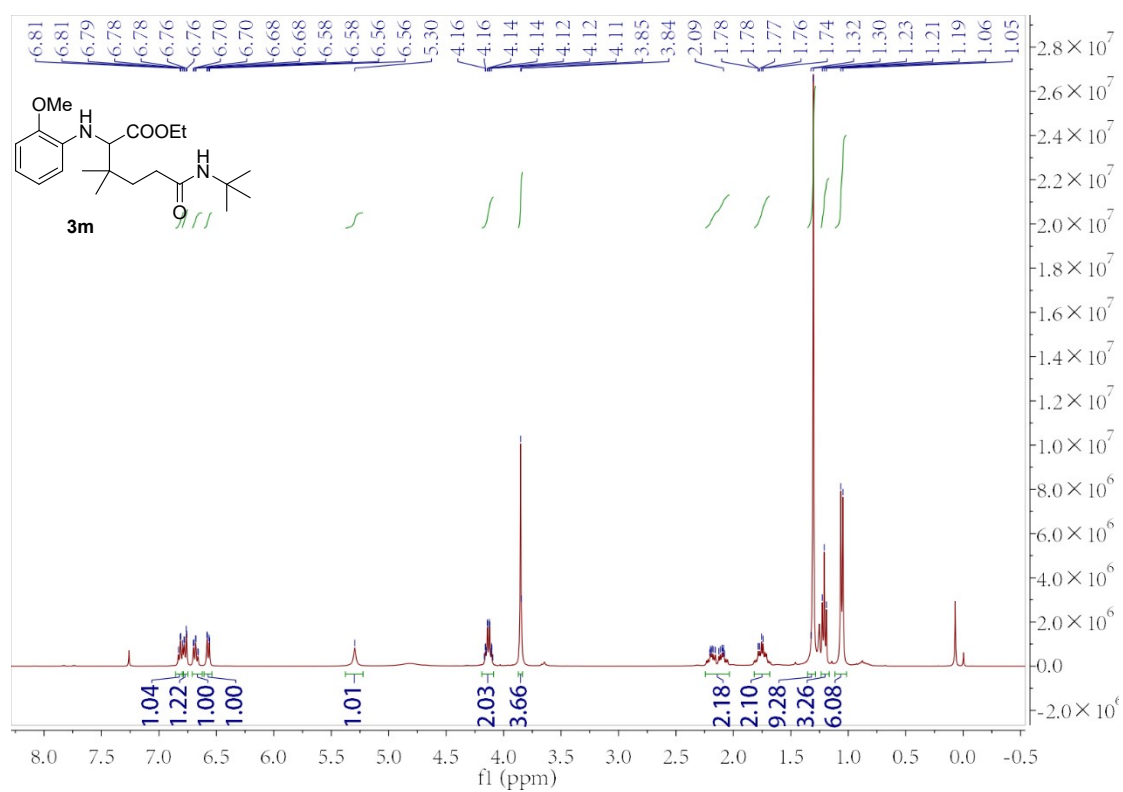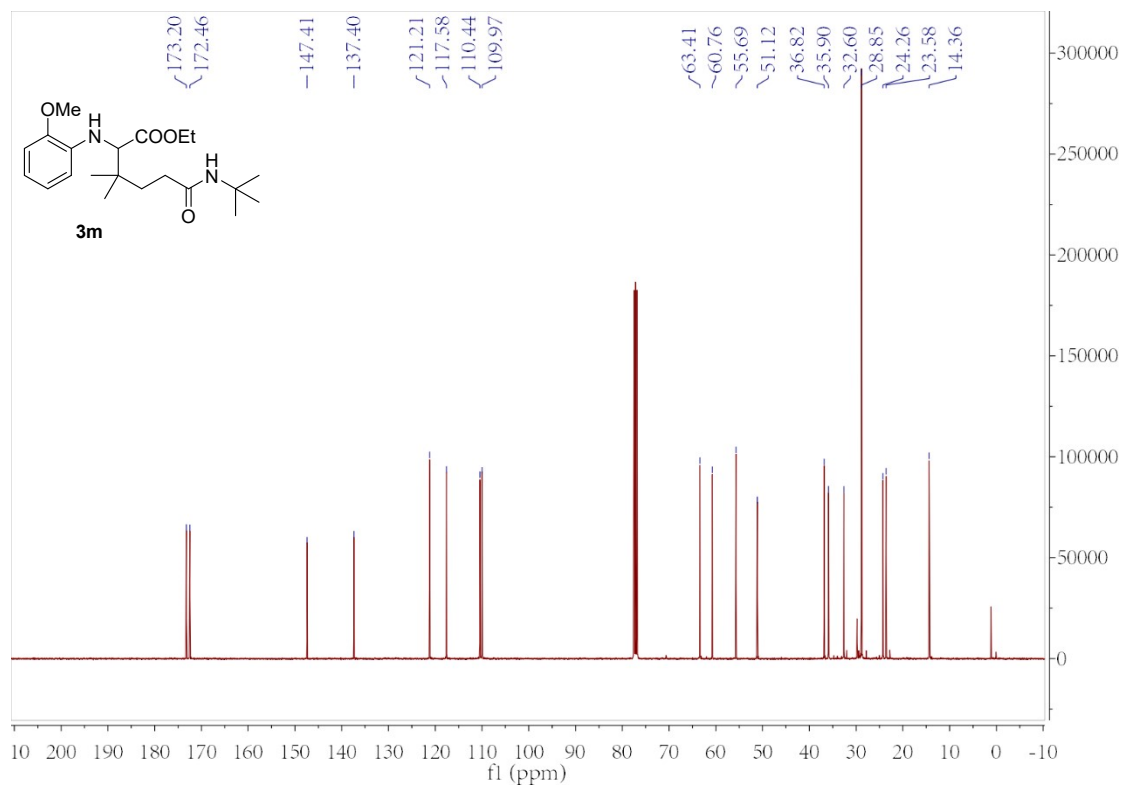

**<sup>1</sup>H NMR and <sup>13</sup>C NMR spectra for compound 3n (CDCl<sub>3</sub>).**

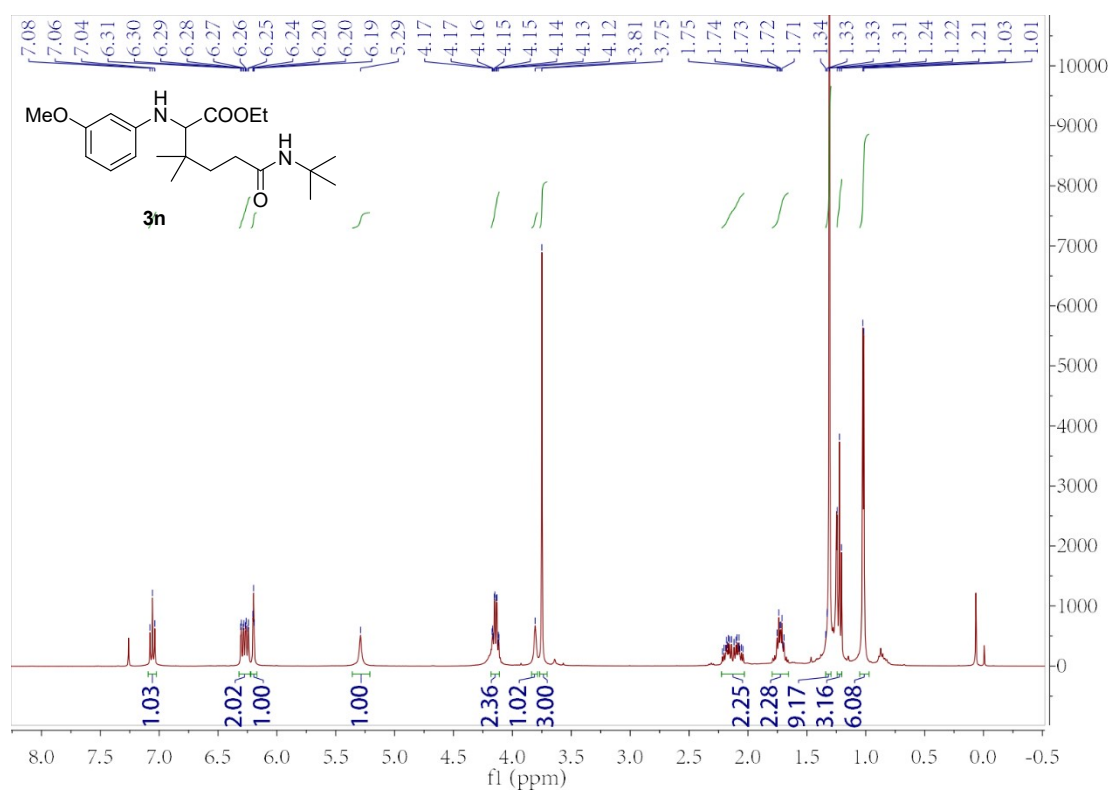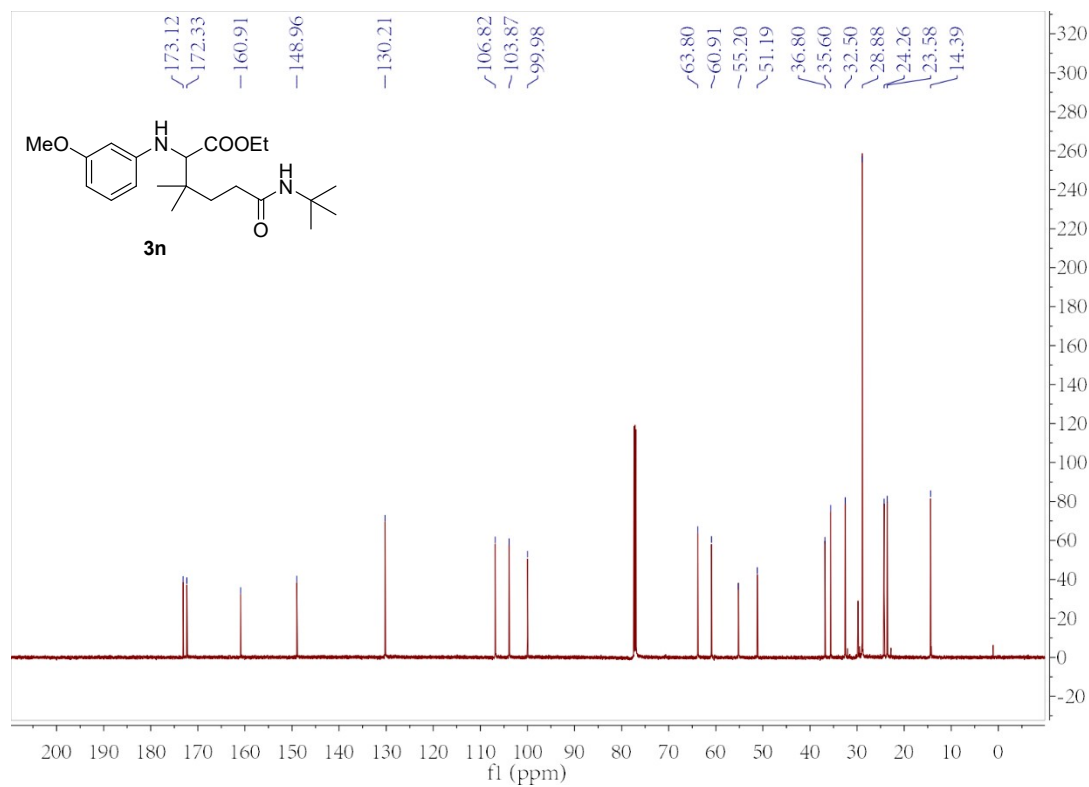

**<sup>1</sup>H, <sup>13</sup>C NMR and <sup>19</sup>F spectra for compound 3o (CDCl<sub>3</sub>).**

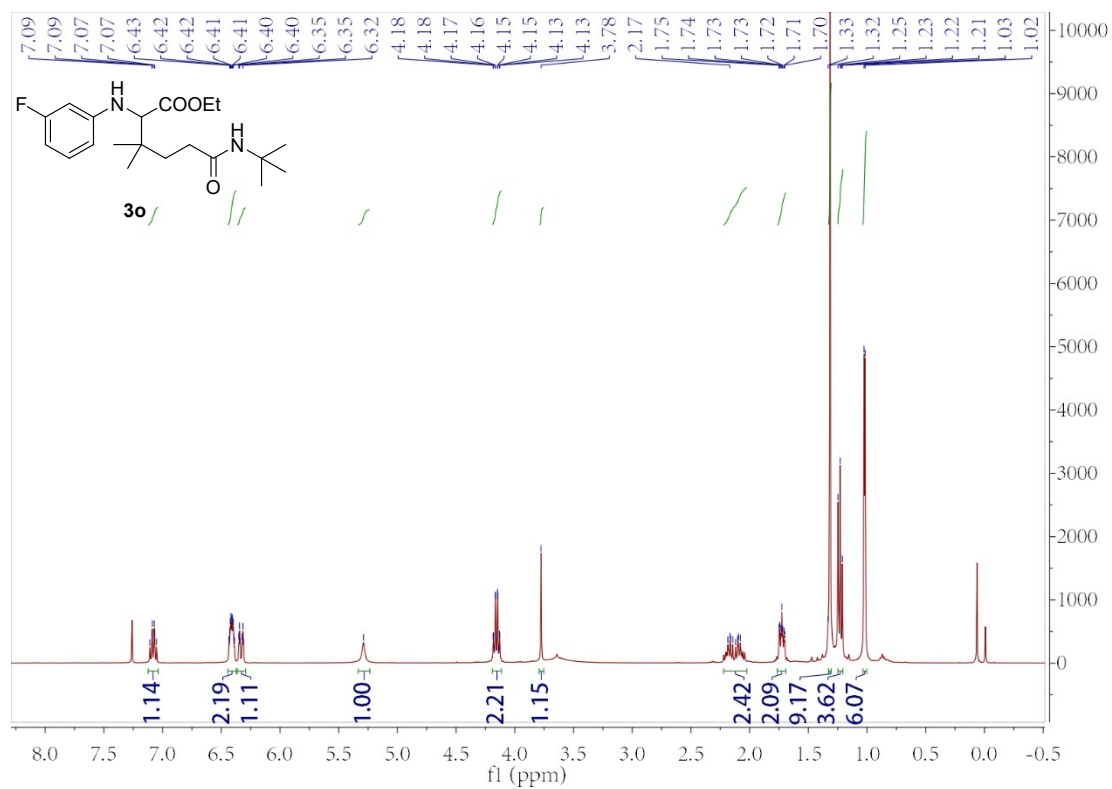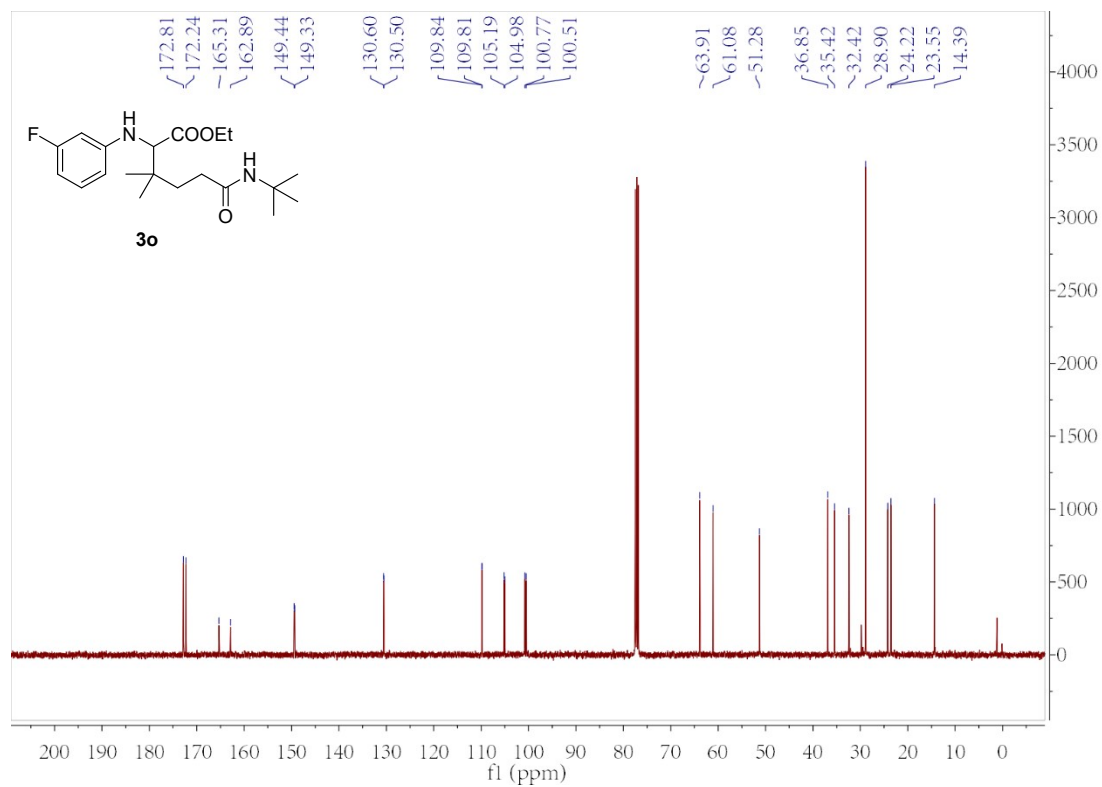

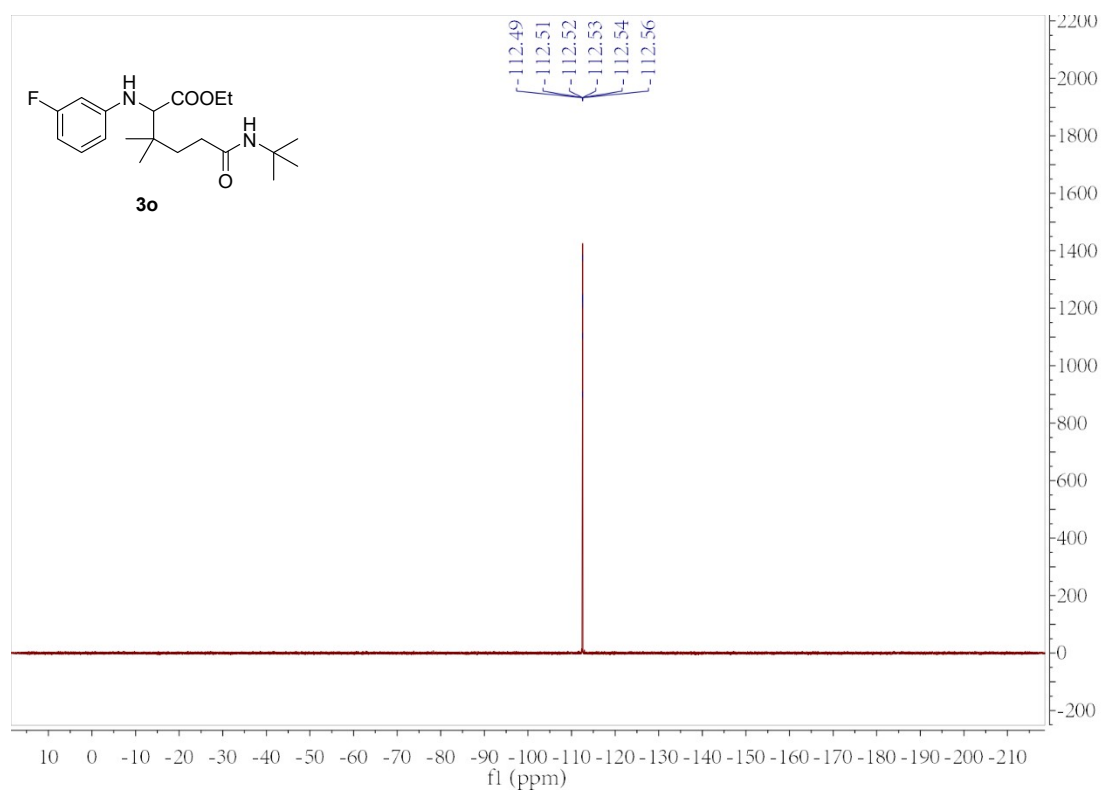

**$^1\text{H}$  NMR and  $^{13}\text{C}$  NMR spectra for compound **3p** ( $\text{CDCl}_3$ ).**

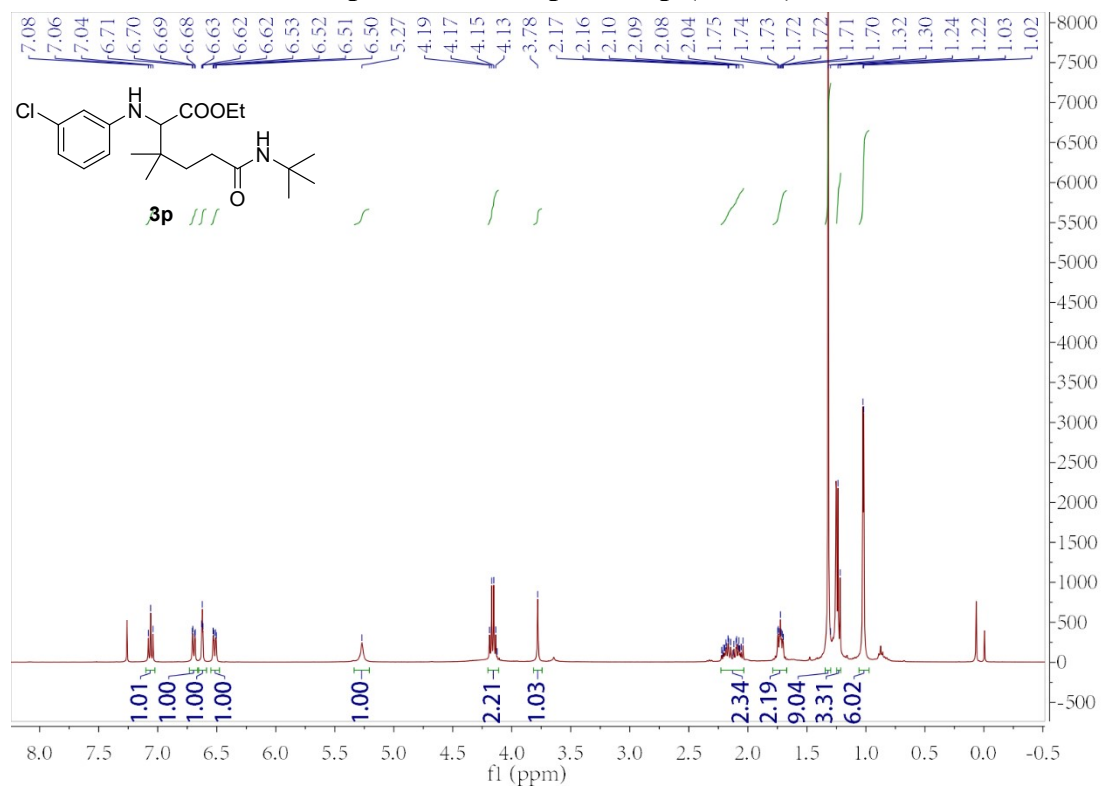

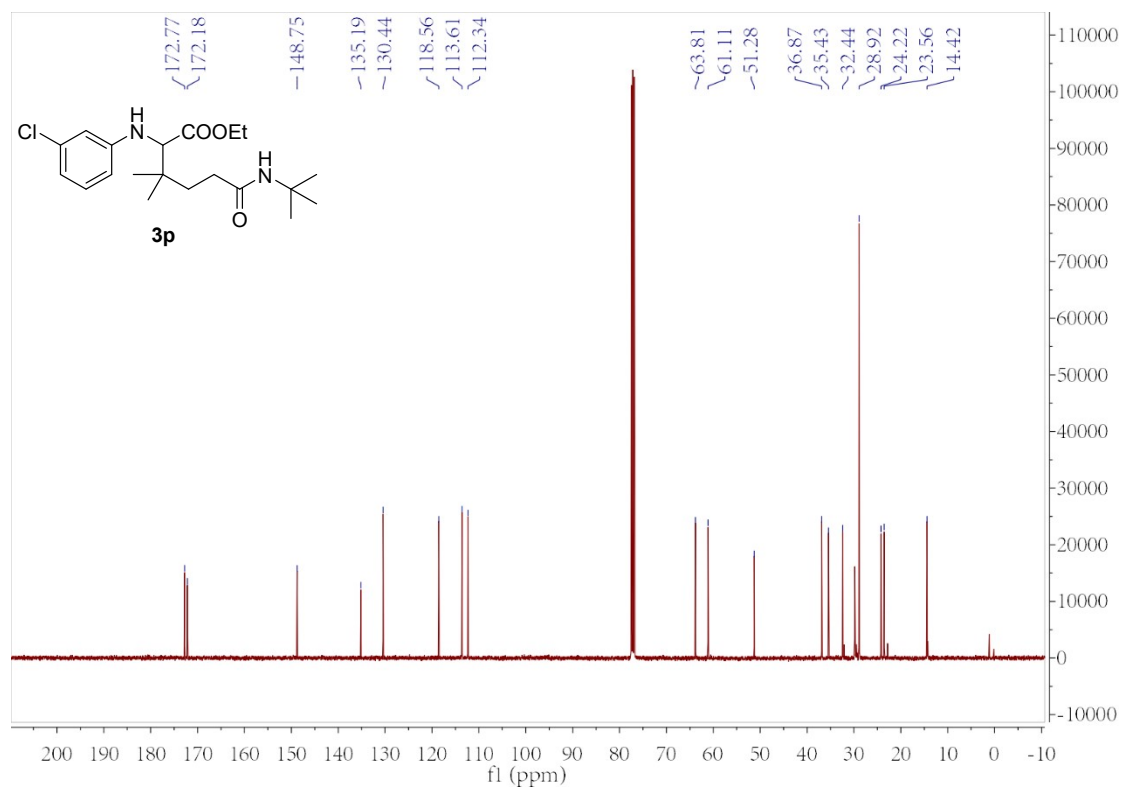

**<sup>1</sup>H NMR and <sup>13</sup>C NMR spectra for compound 3q (CDCl<sub>3</sub>).**

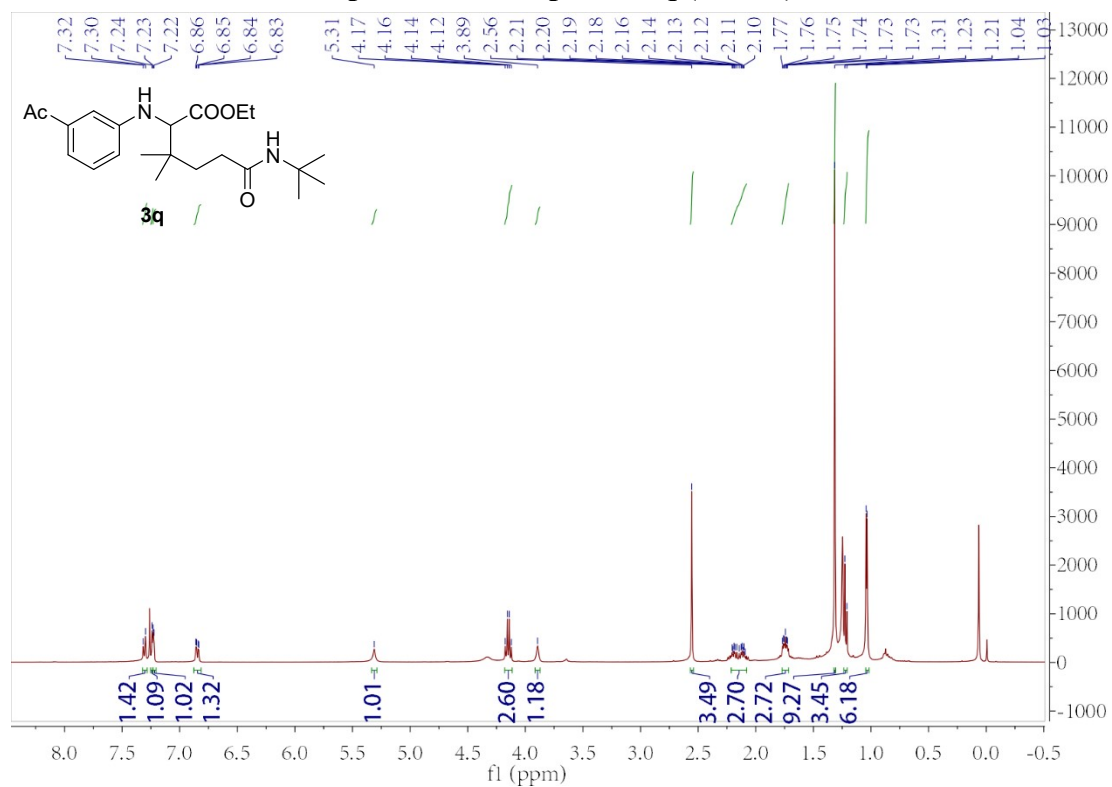



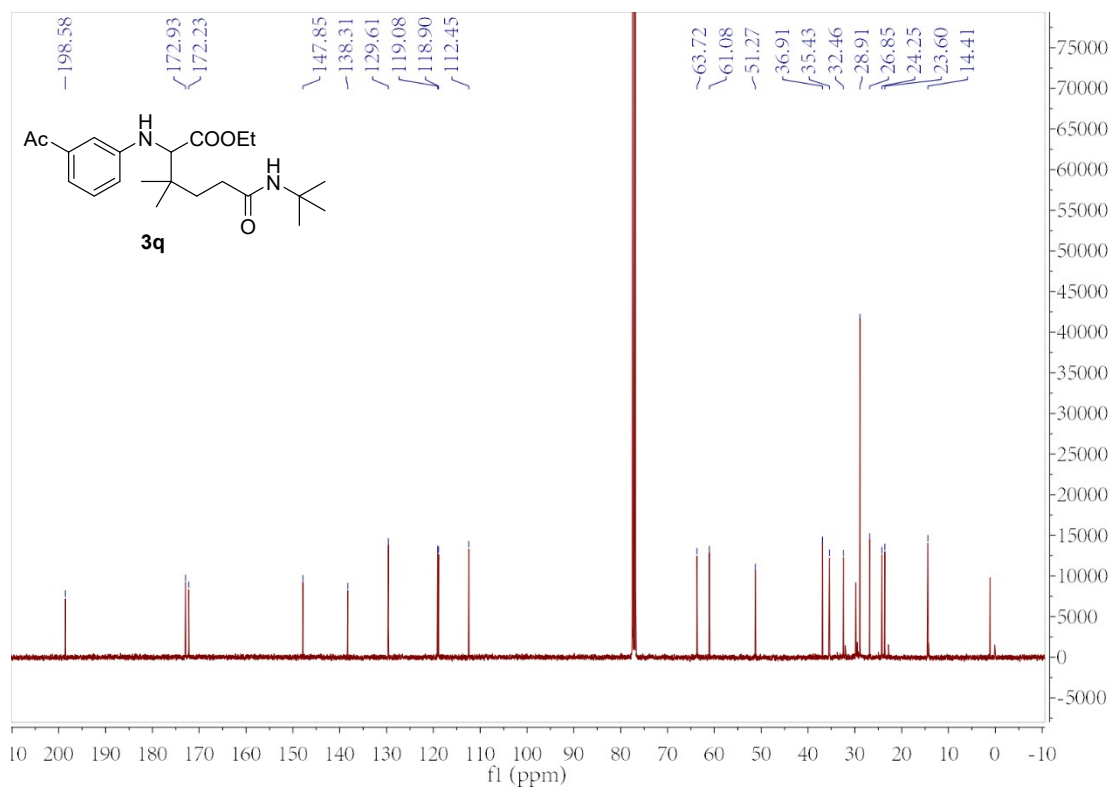

**<sup>1</sup>H NMR and <sup>13</sup>C NMR spectra for compound 3r (CDCl<sub>3</sub>).**

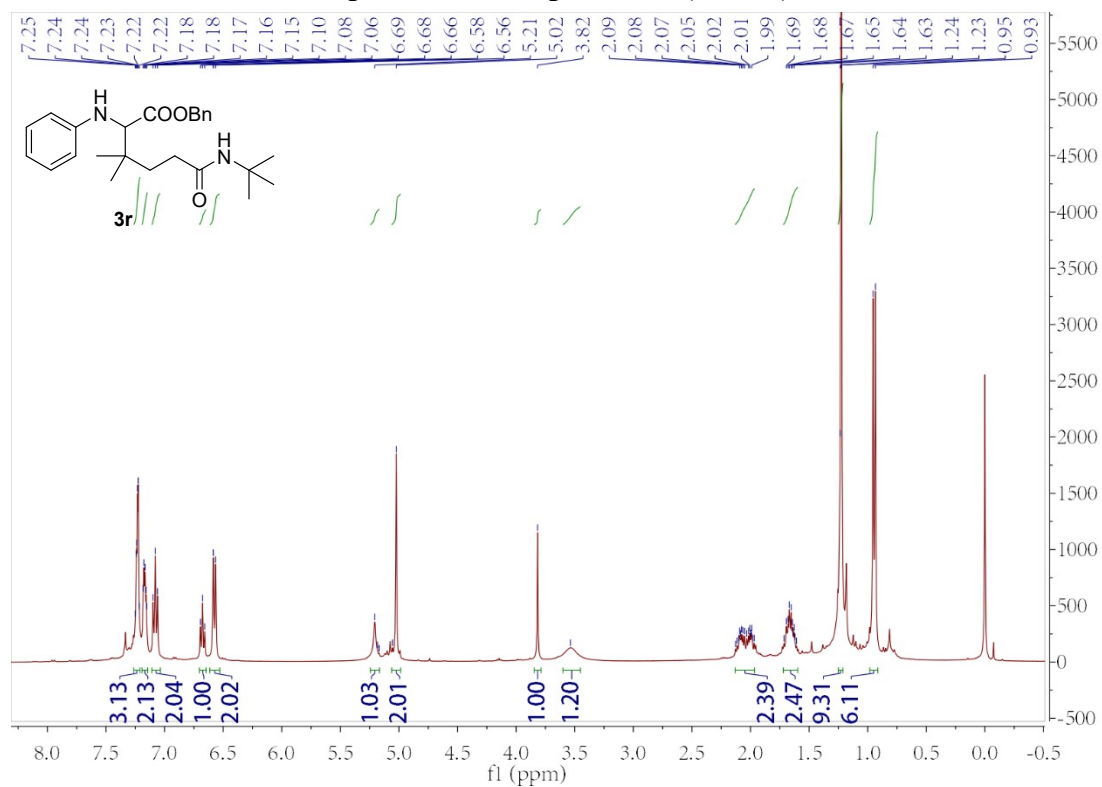

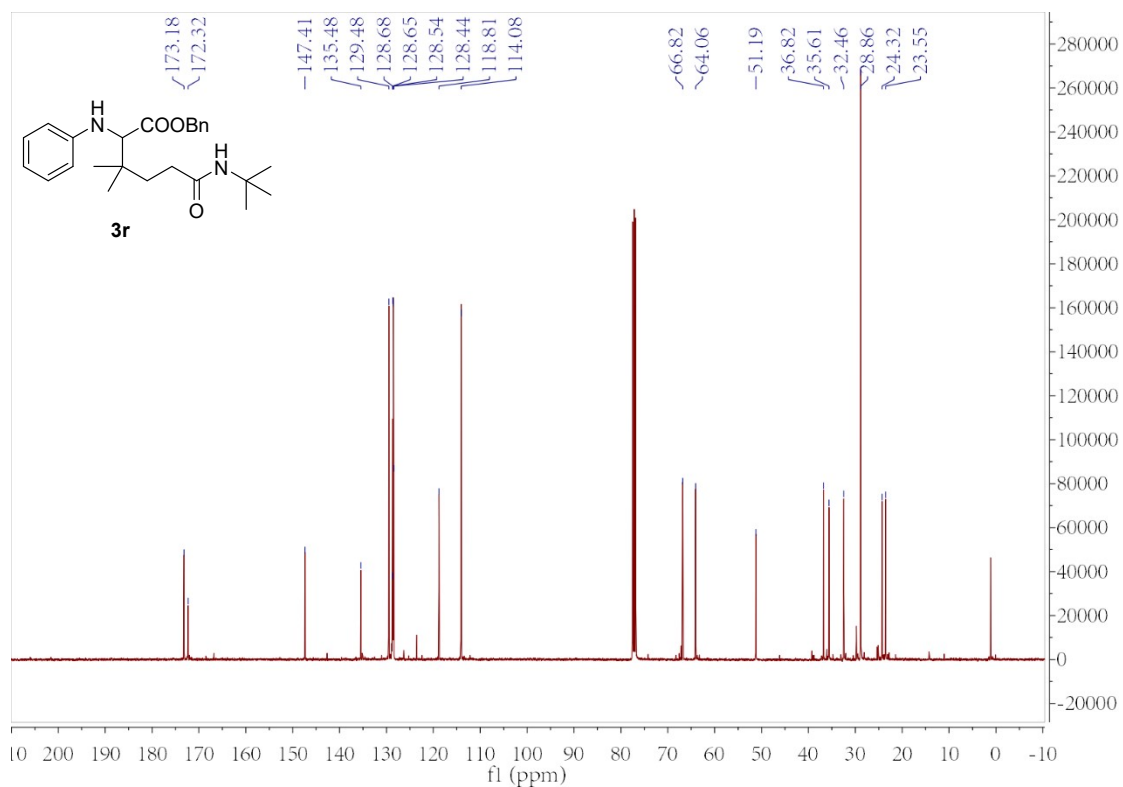

**<sup>1</sup>H NMR and <sup>13</sup>C NMR spectra for compound 3s (CDCl<sub>3</sub>).**

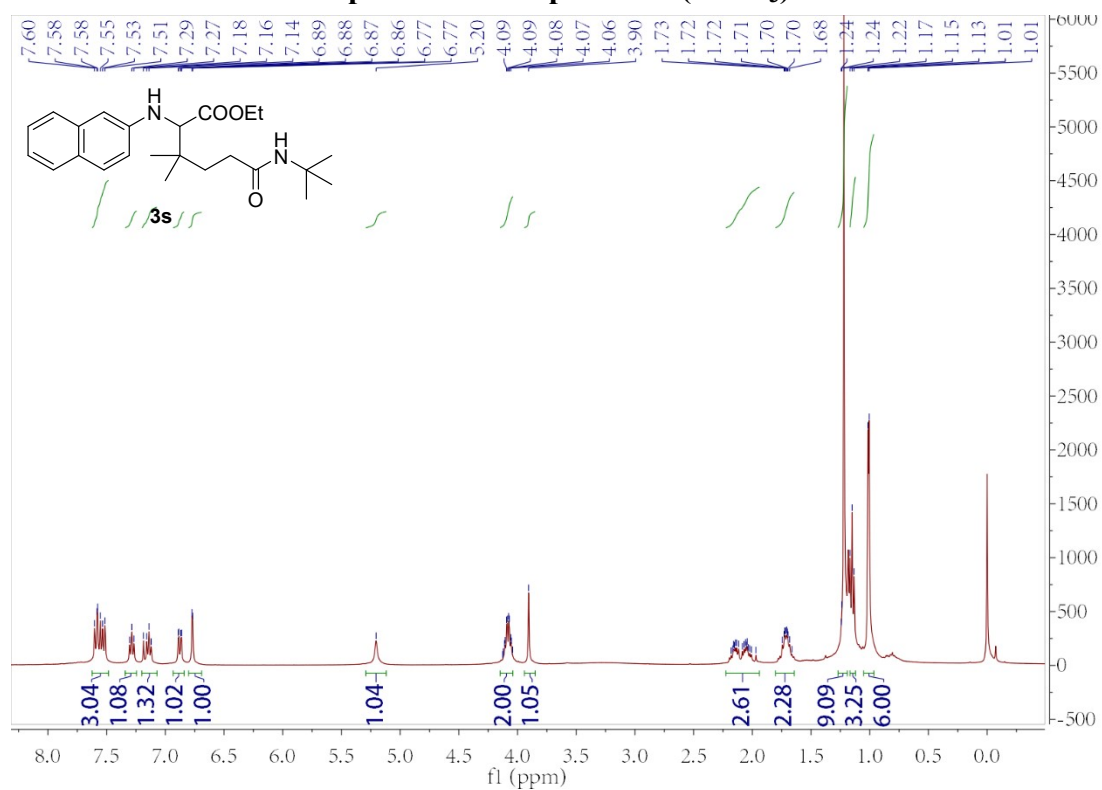

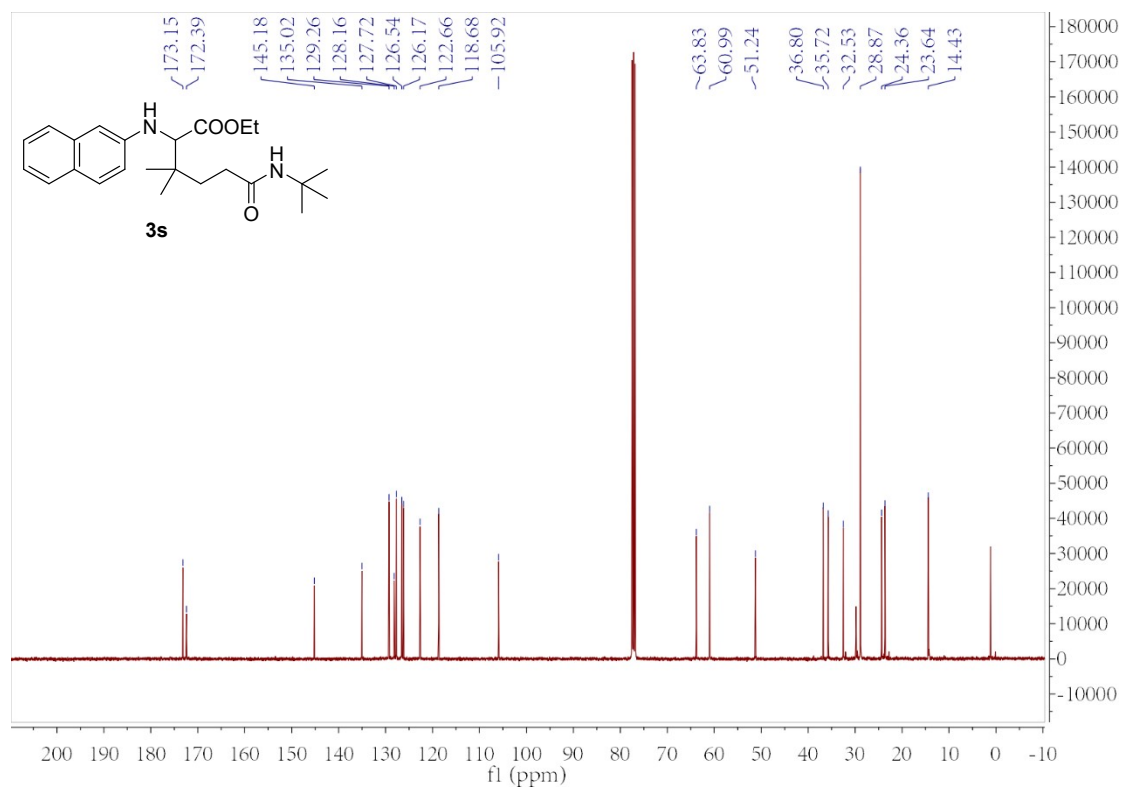

**<sup>1</sup>H NMR and <sup>13</sup>C NMR spectra for compound 3t (CDCl<sub>3</sub>).**

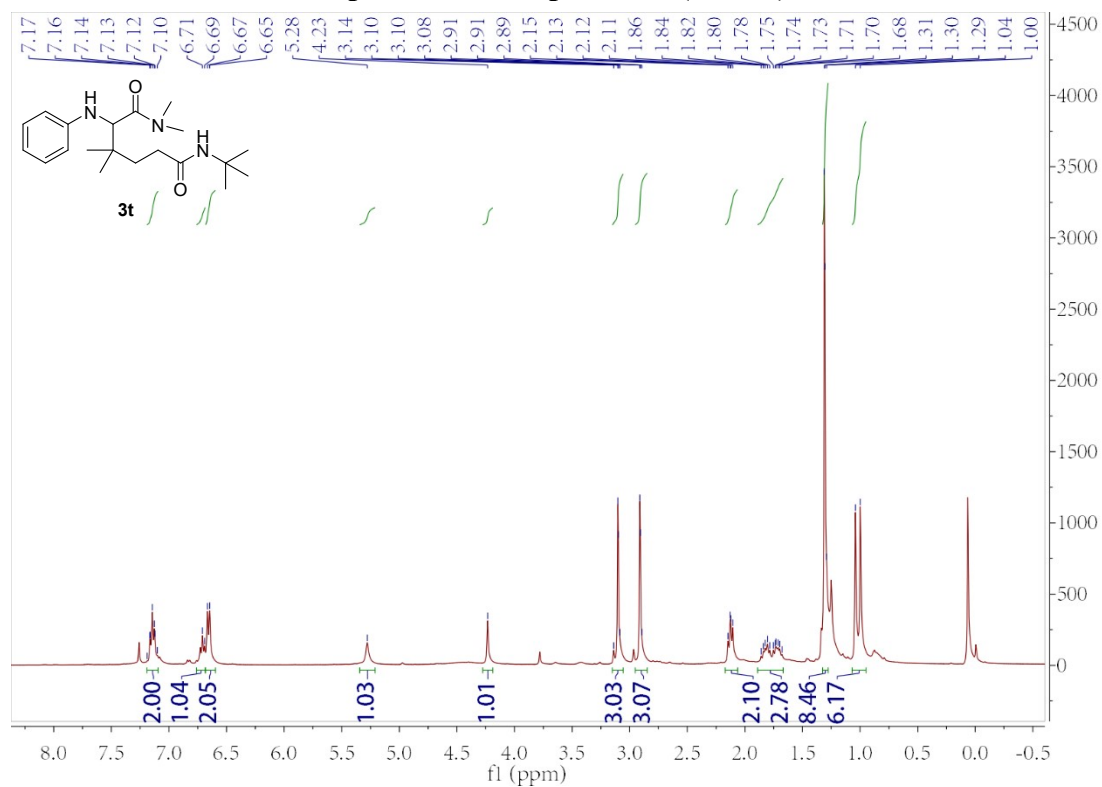

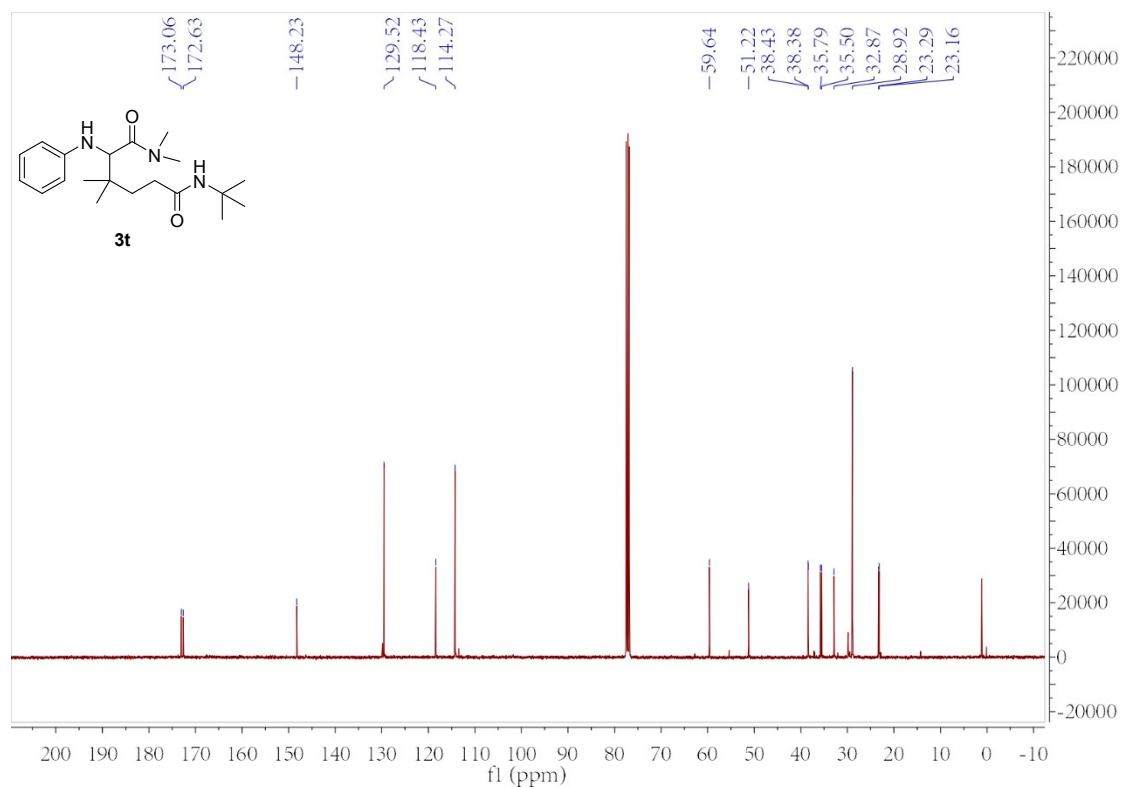

**<sup>1</sup>H NMR and <sup>13</sup>C NMR spectra for compound 3u (CDCl<sub>3</sub>).**

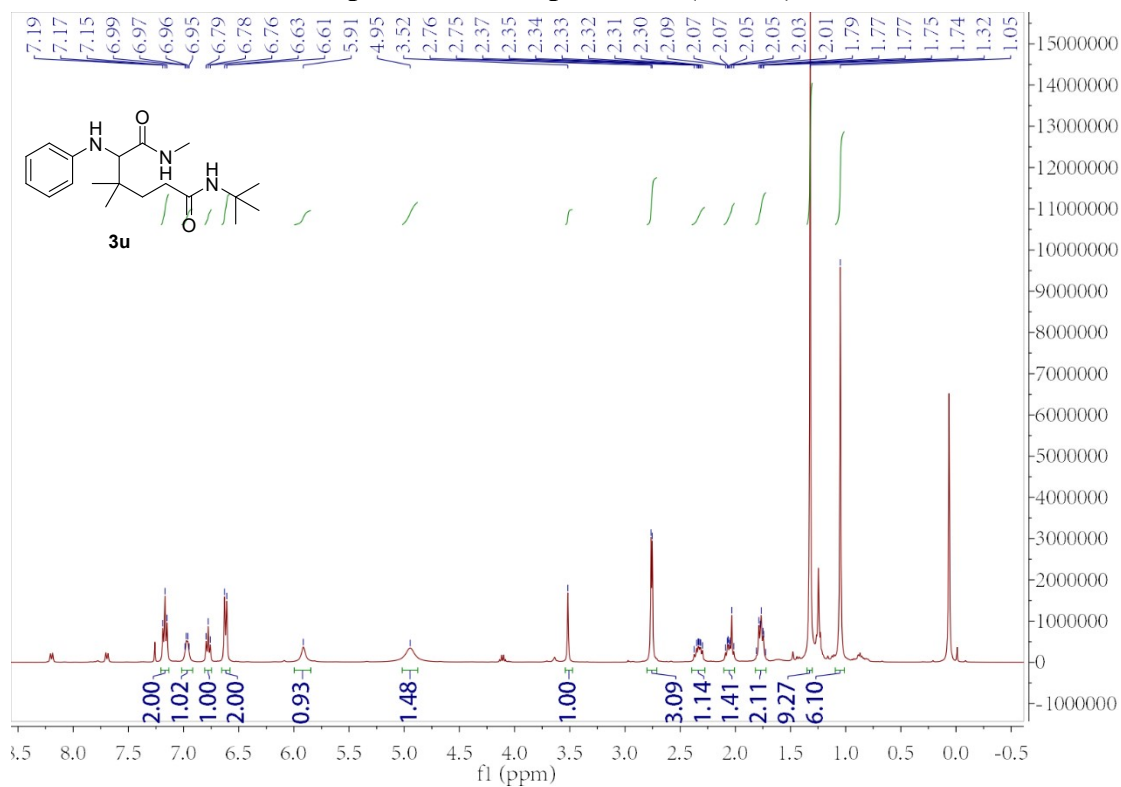

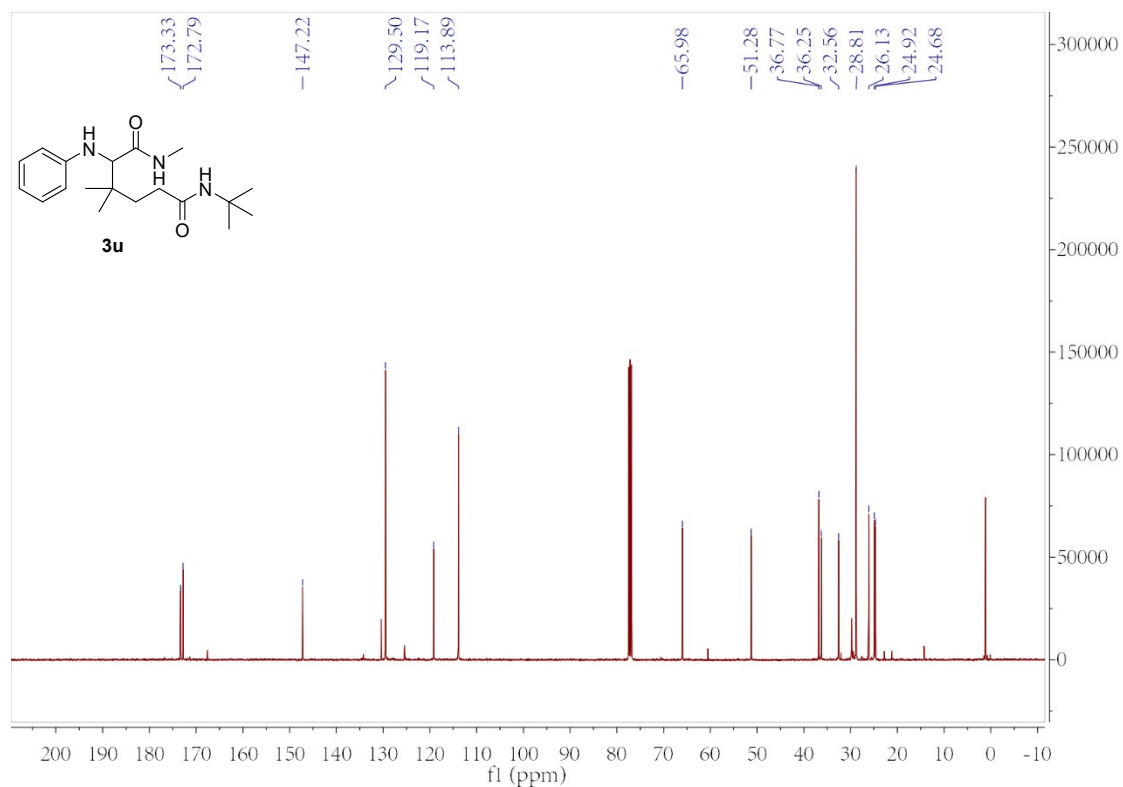

**<sup>1</sup>H NMR and <sup>13</sup>C NMR spectra for compound 3v (CDCl<sub>3</sub>).**

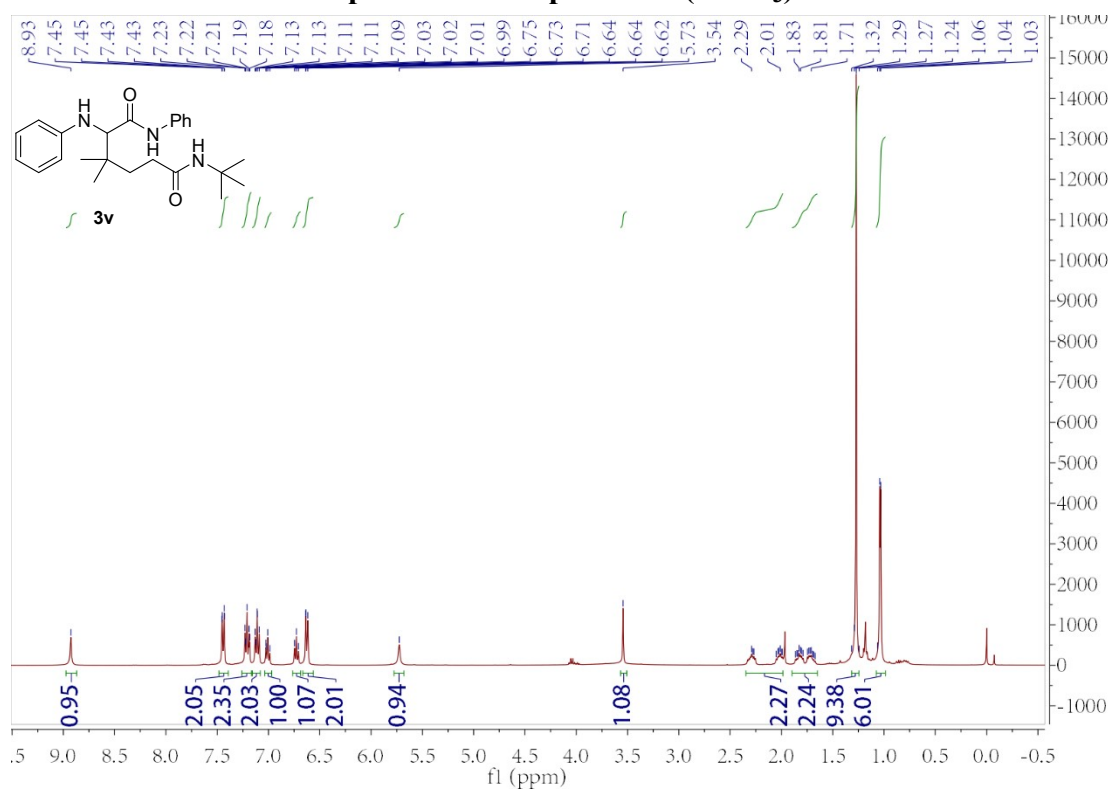

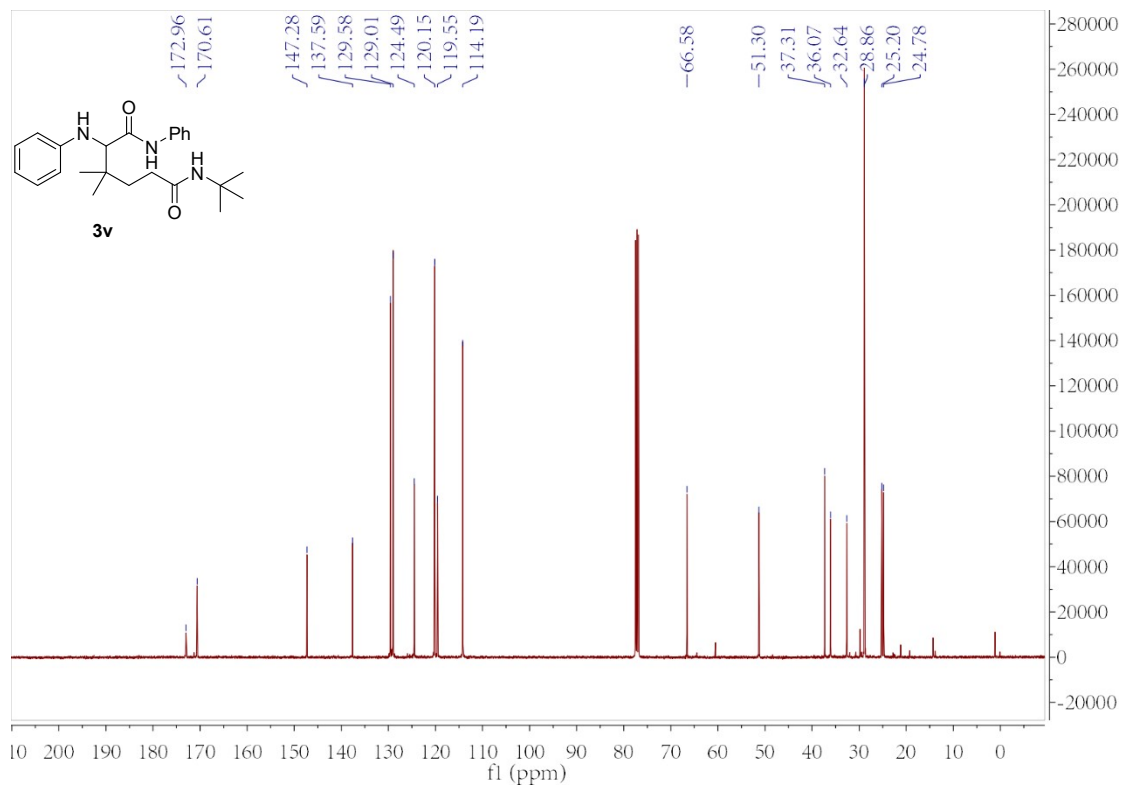

**<sup>1</sup>H NMR and <sup>13</sup>C NMR spectra for compound 3w (CDCl<sub>3</sub>).**

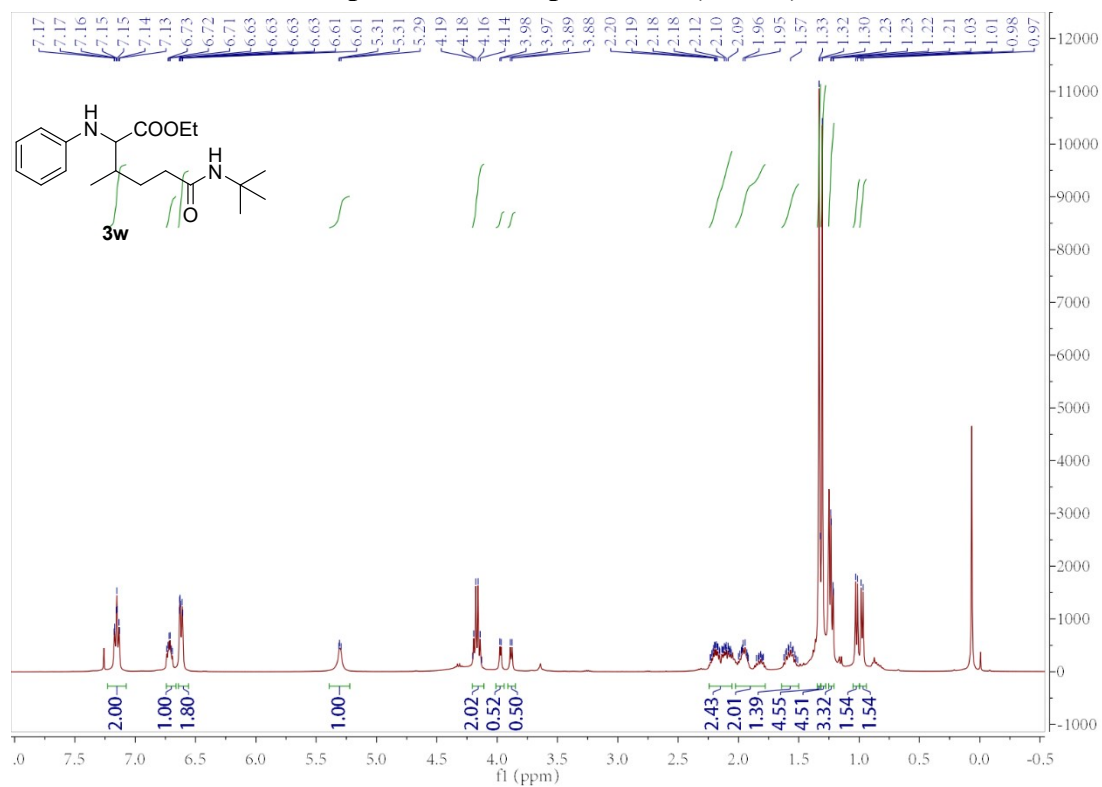

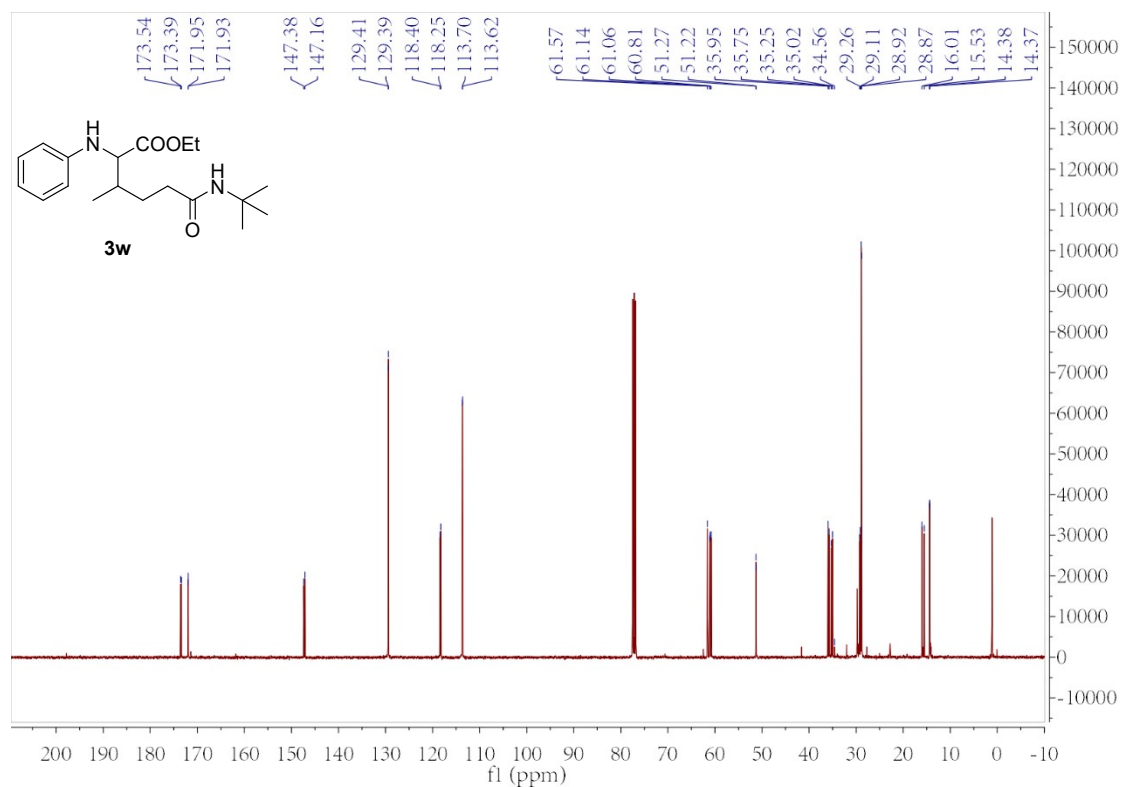

**<sup>1</sup>H NMR and <sup>13</sup>C NMR spectra for compound 3x (CDCl<sub>3</sub>).**

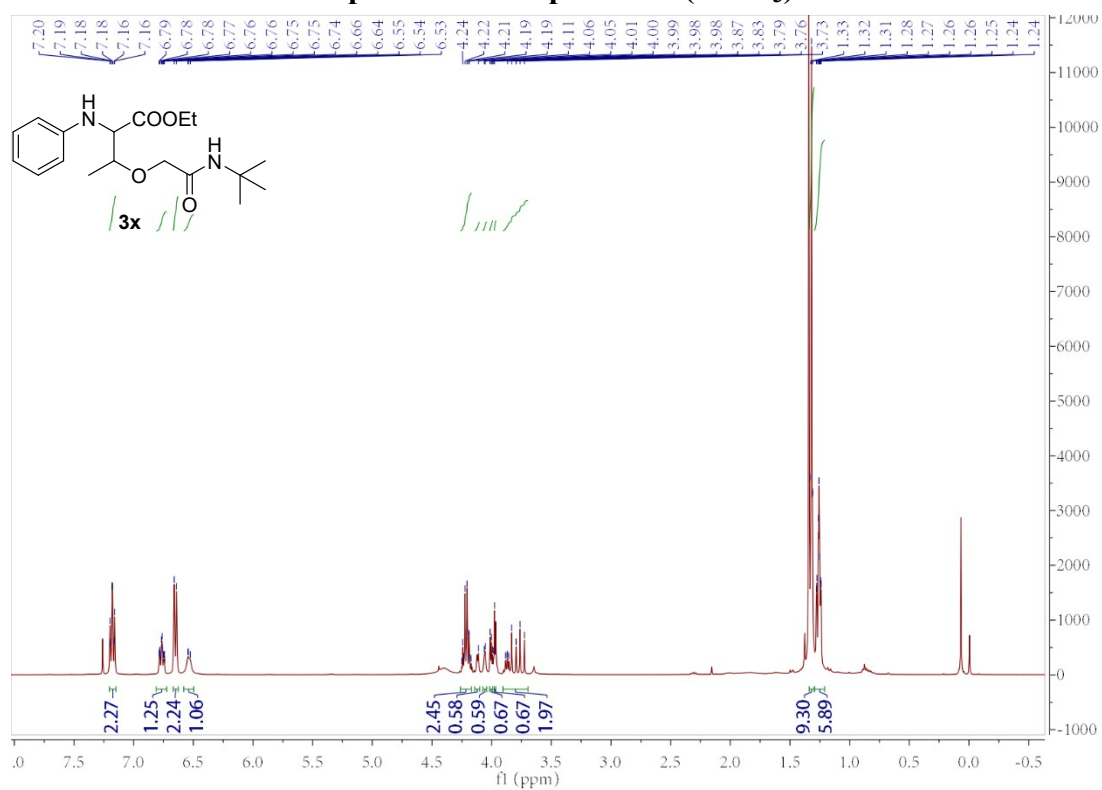

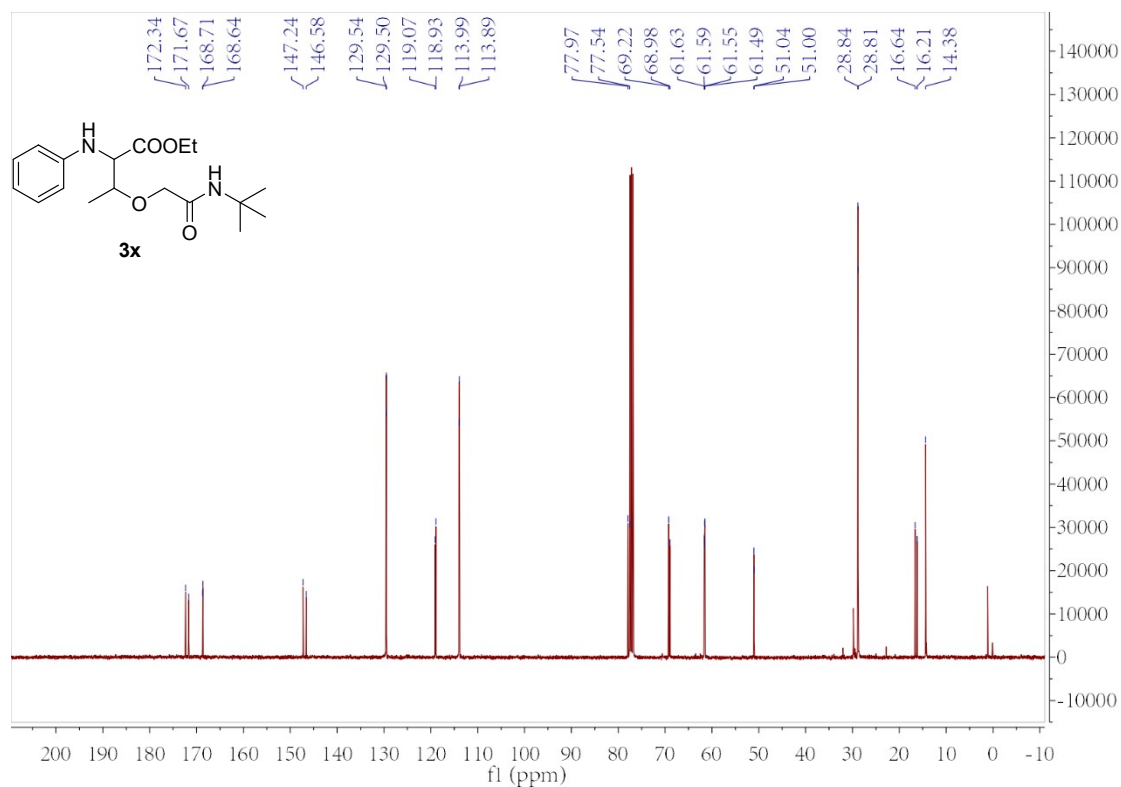

**<sup>1</sup>H NMR and <sup>13</sup>C NMR spectra for compound 3y (CDCl<sub>3</sub>).**

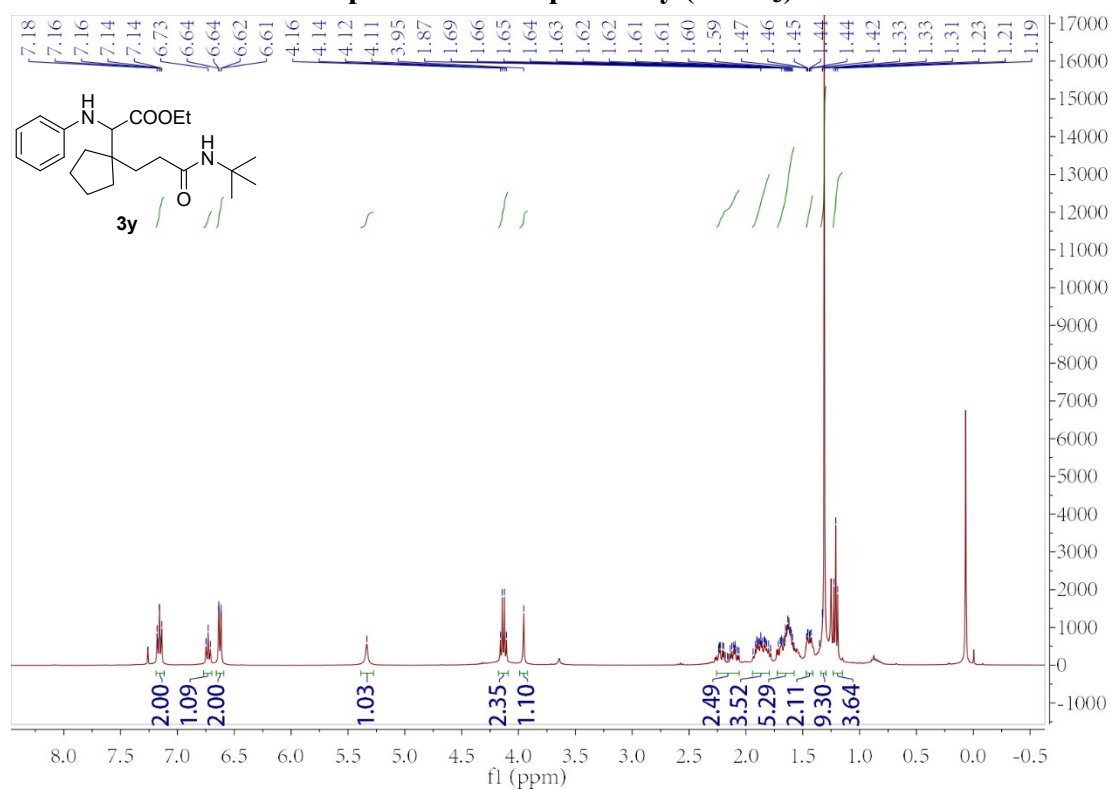



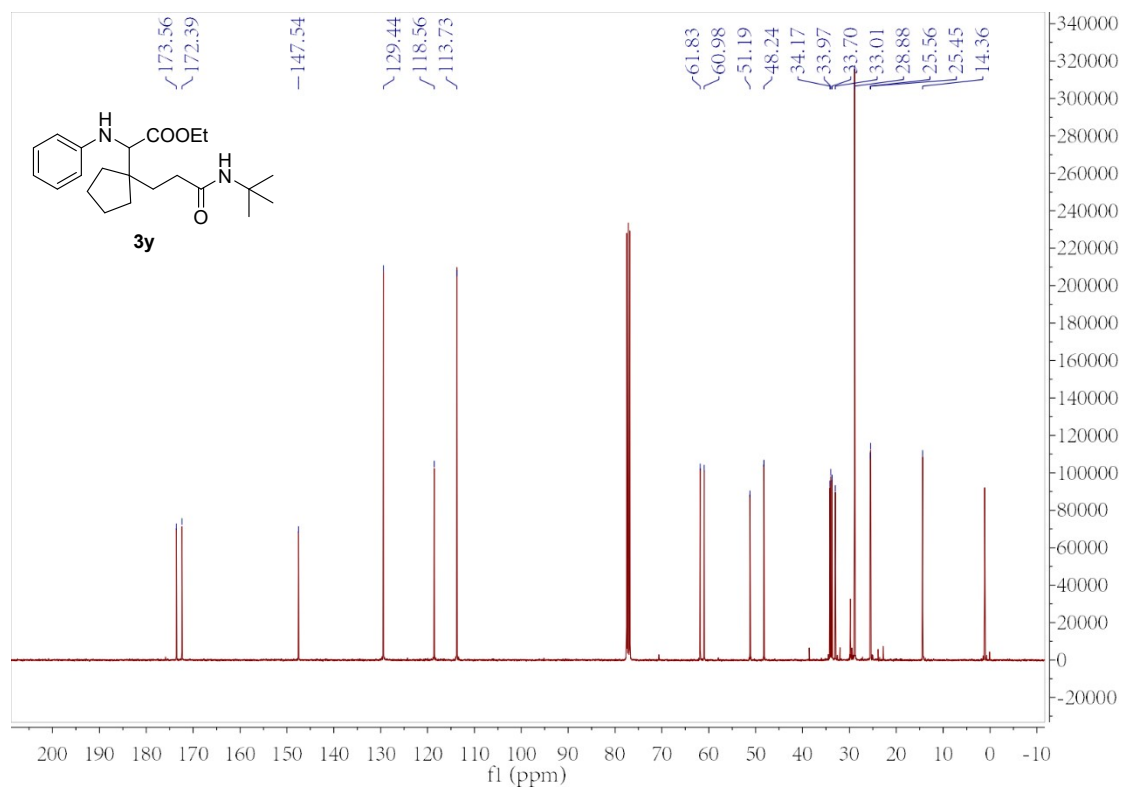

**<sup>1</sup>H NMR and <sup>13</sup>C NMR spectra for compound 3z (CDCl<sub>3</sub>).**

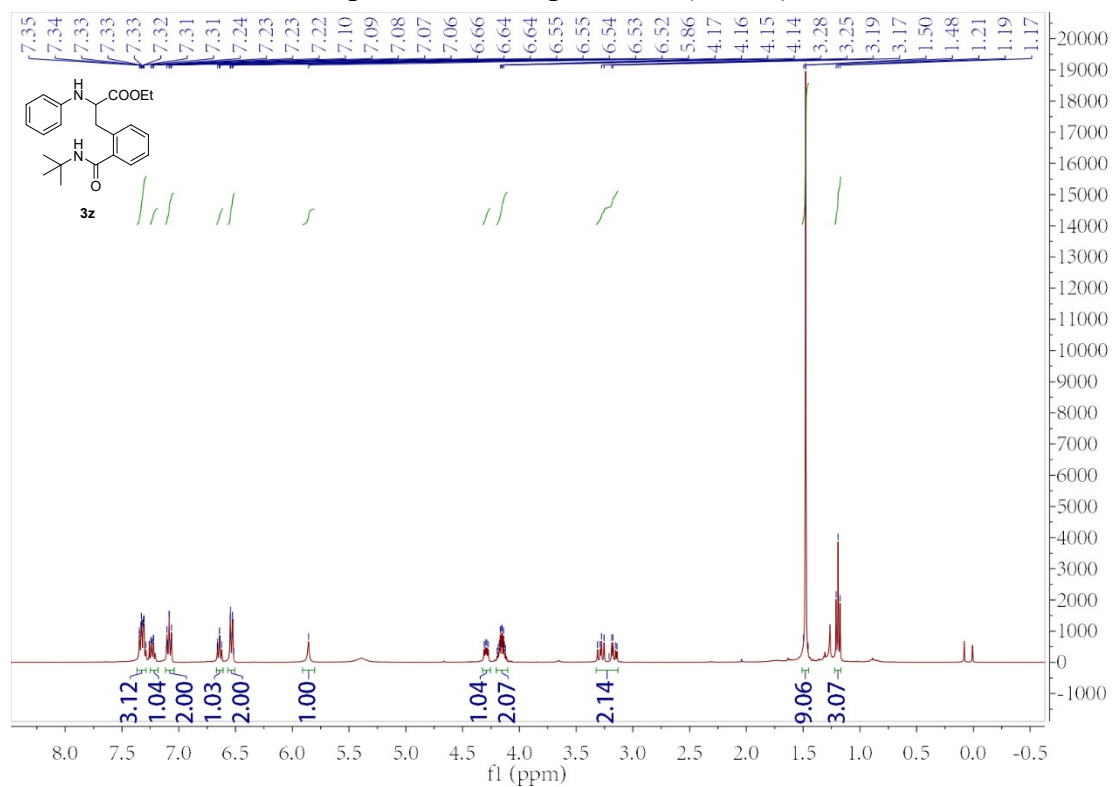

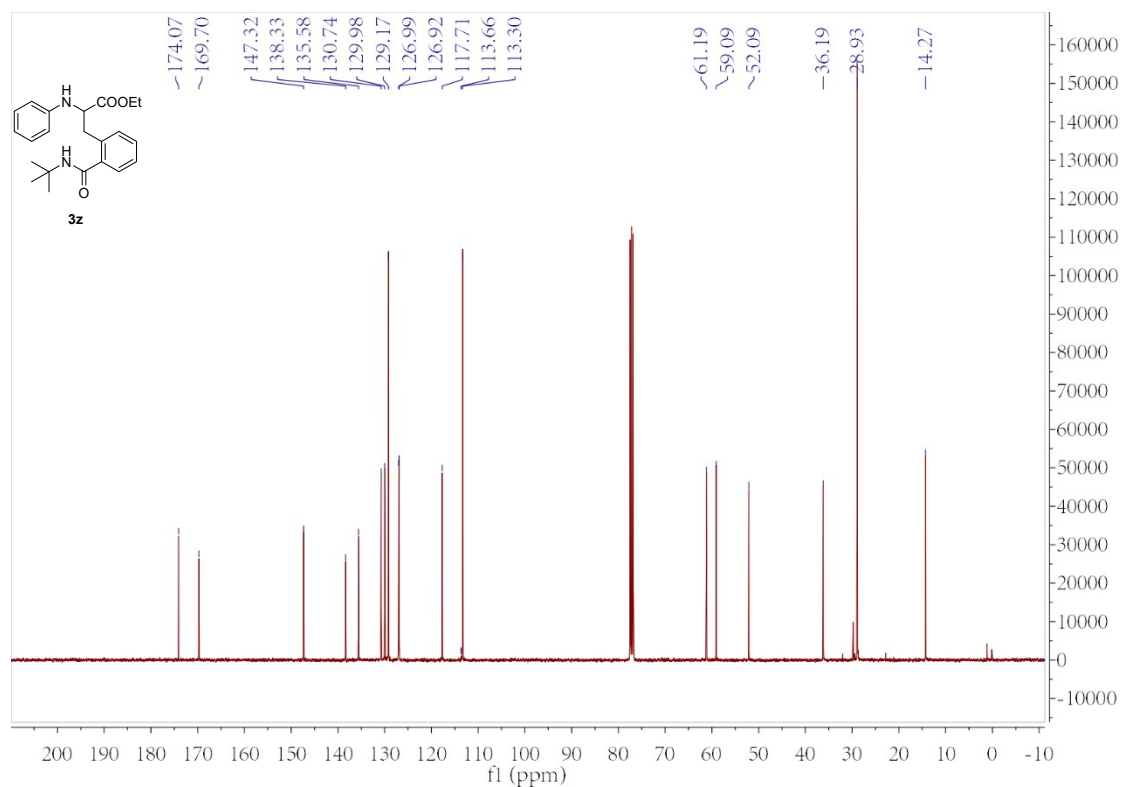

**<sup>1</sup>H NMR and <sup>13</sup>C NMR spectra for compound 3aa (CDCl<sub>3</sub>).**

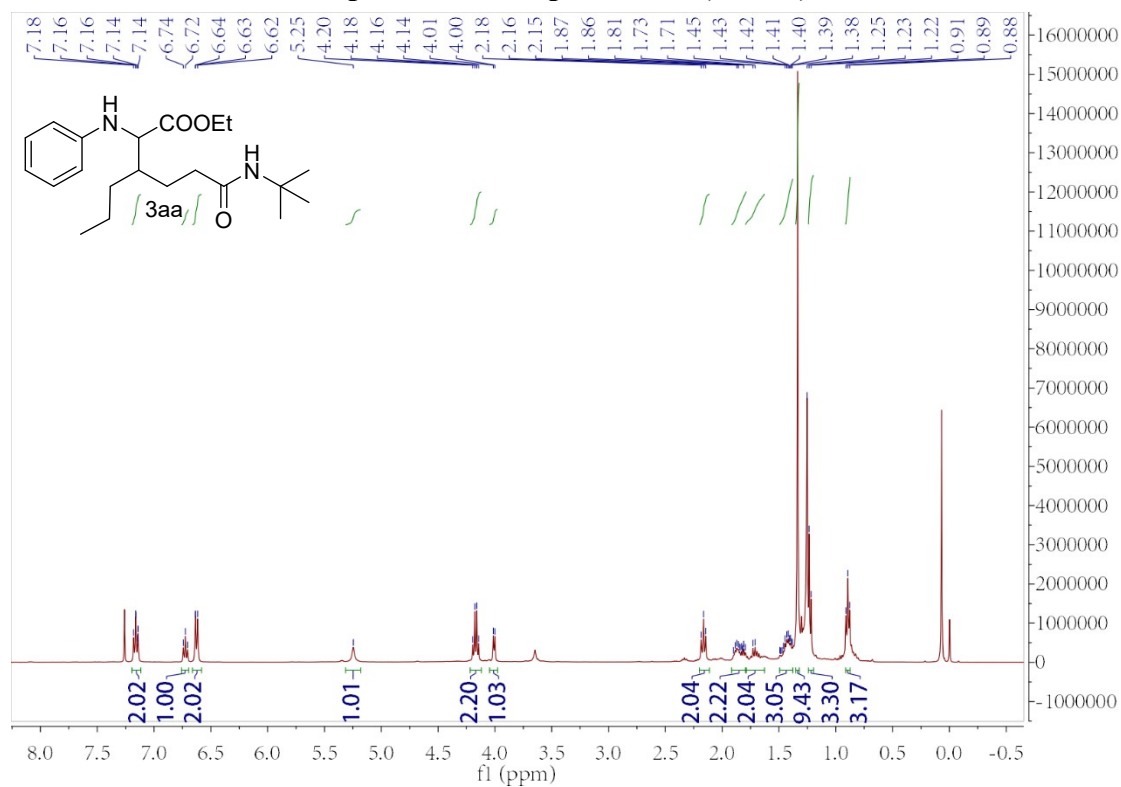

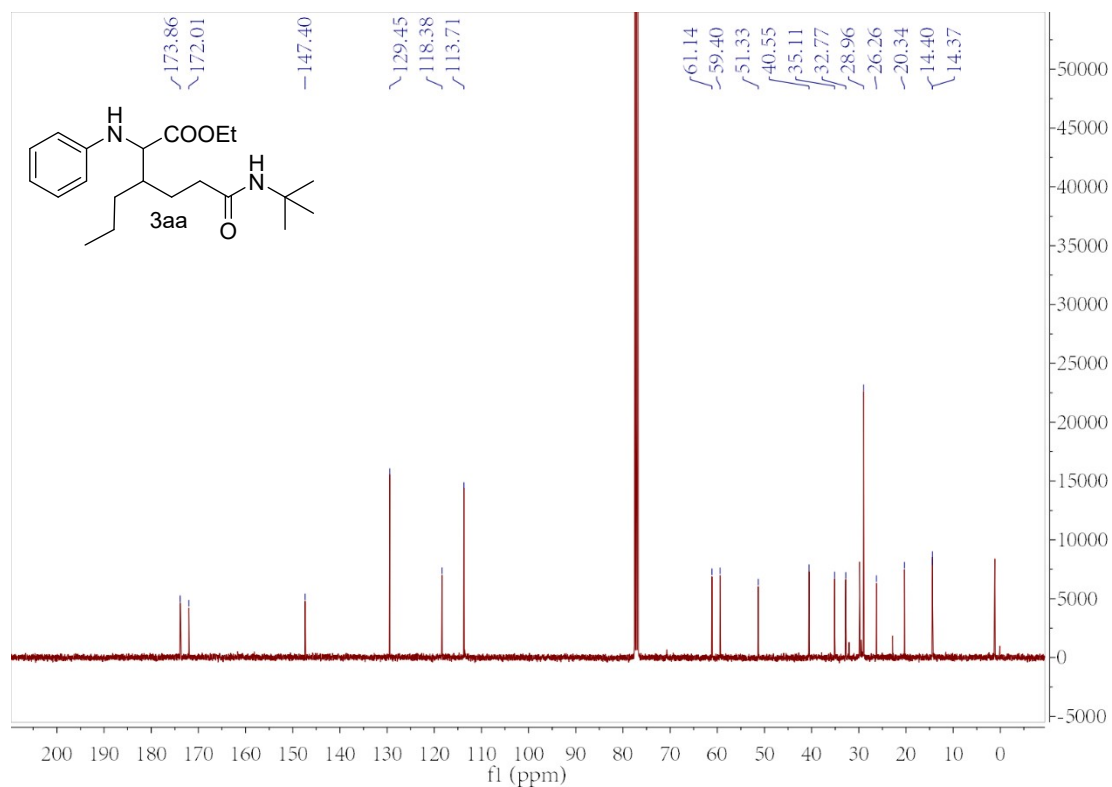

**<sup>1</sup>H NMR and <sup>13</sup>C NMR spectra for compound 3ab (CDCl<sub>3</sub>).**

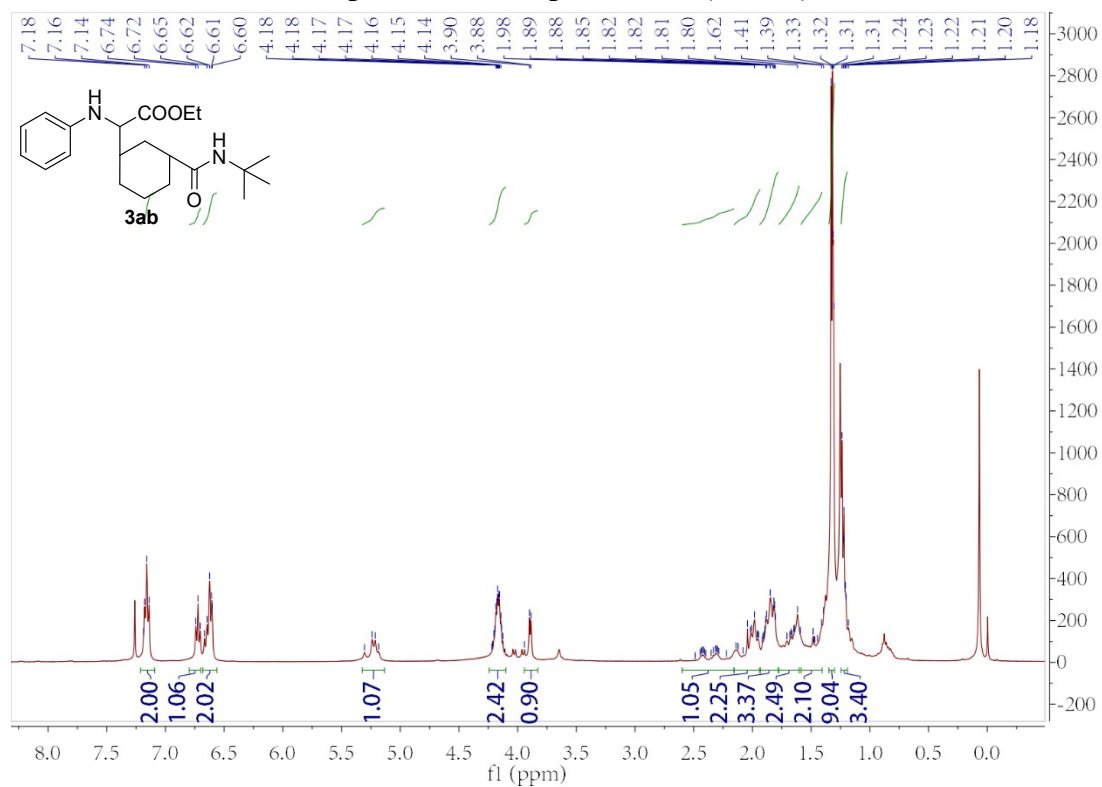

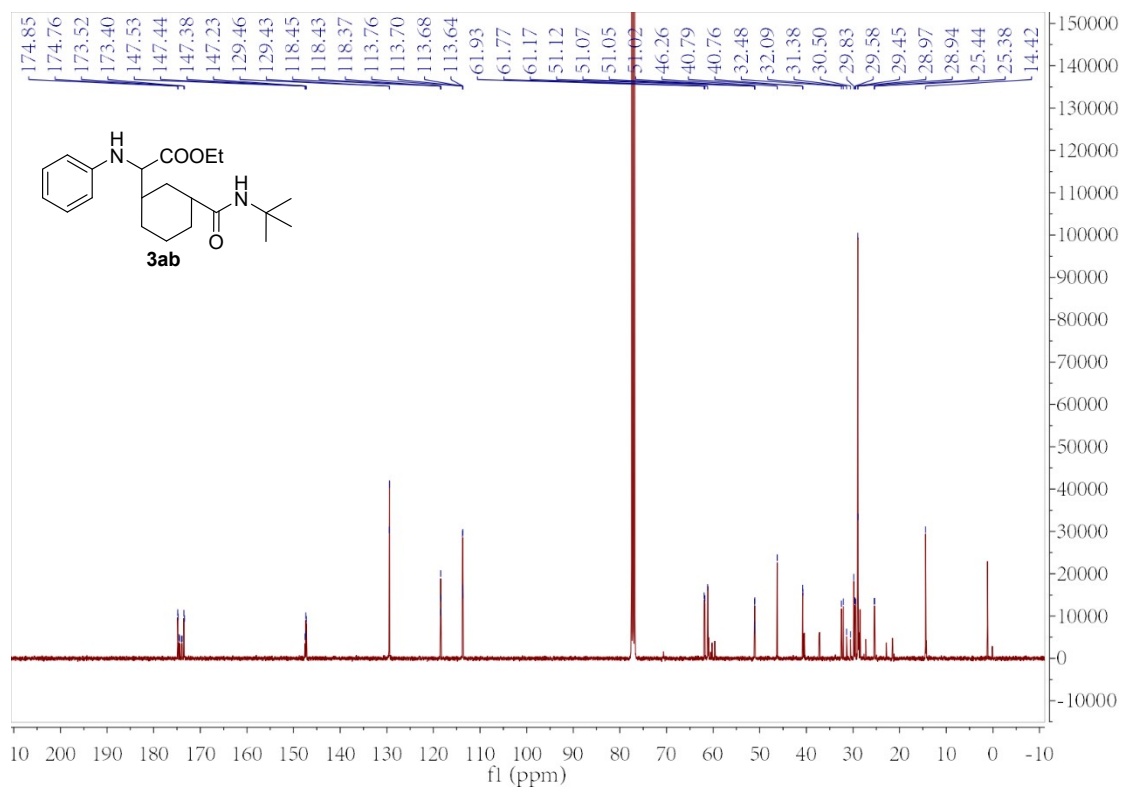

**<sup>1</sup>H NMR and <sup>13</sup>C NMR spectra for compound 3ac (CDCl<sub>3</sub>).**

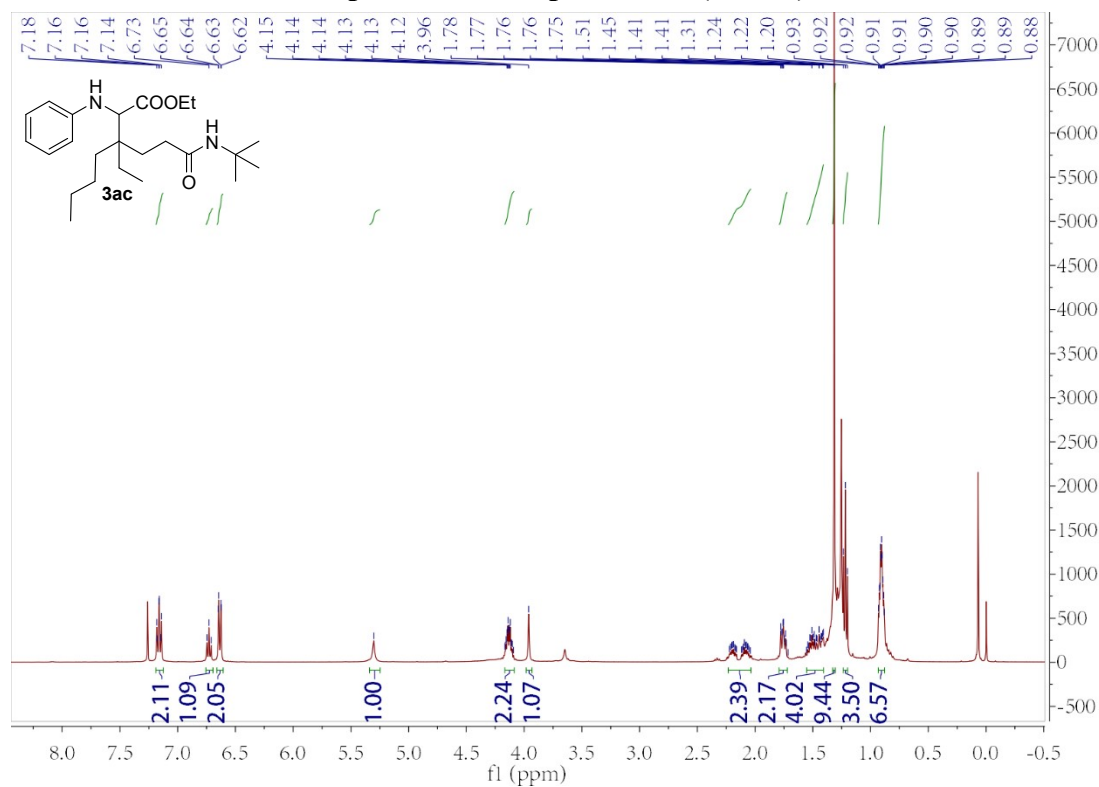

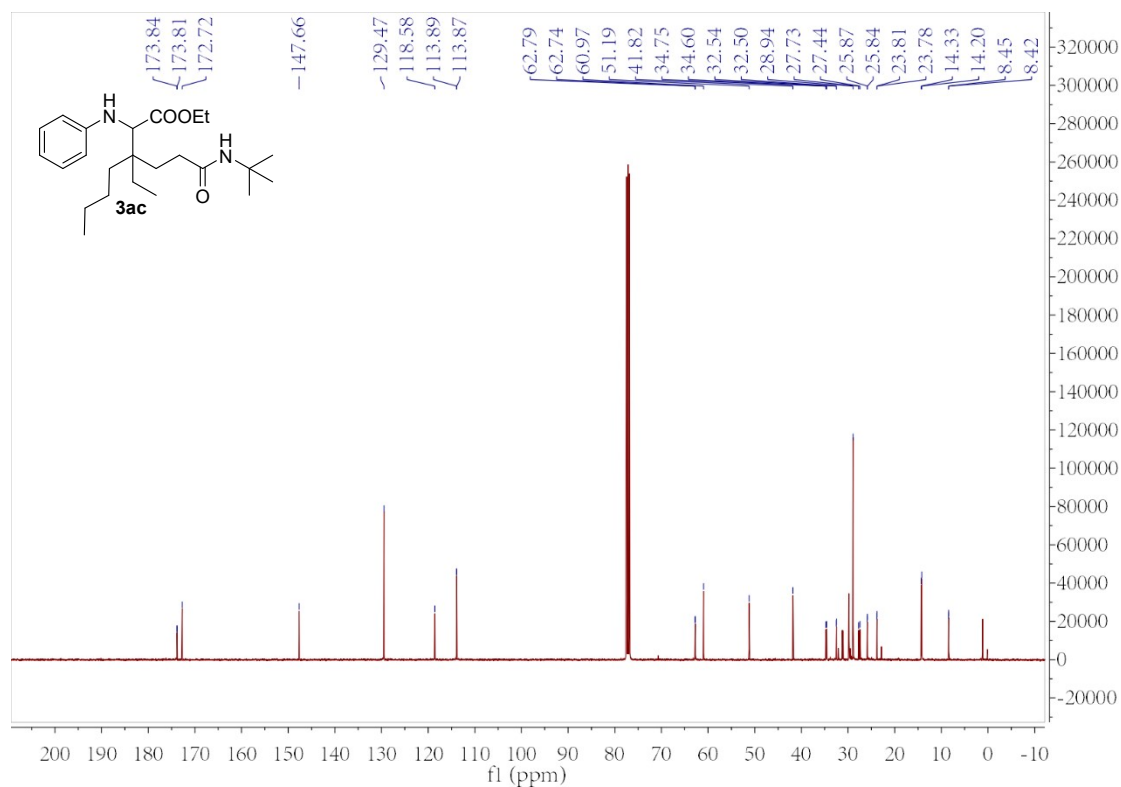

**<sup>1</sup>H NMR and <sup>13</sup>C NMR spectra for compound 3ad (CDCl<sub>3</sub>).**

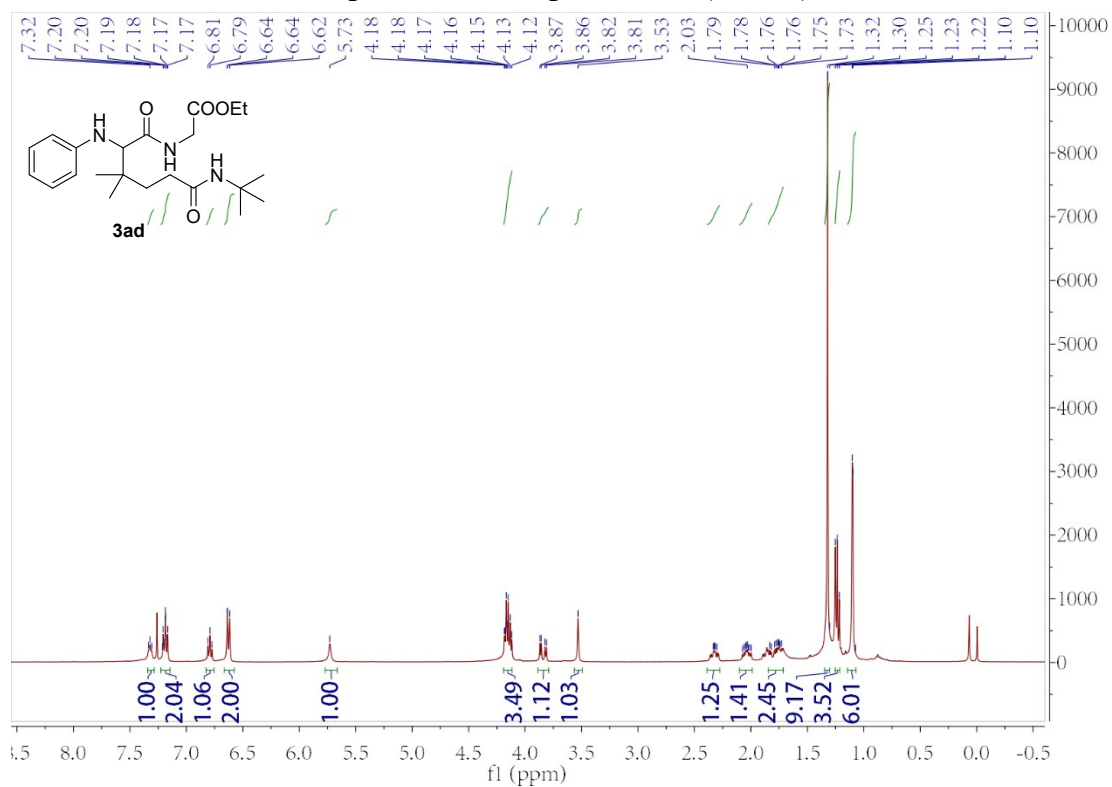

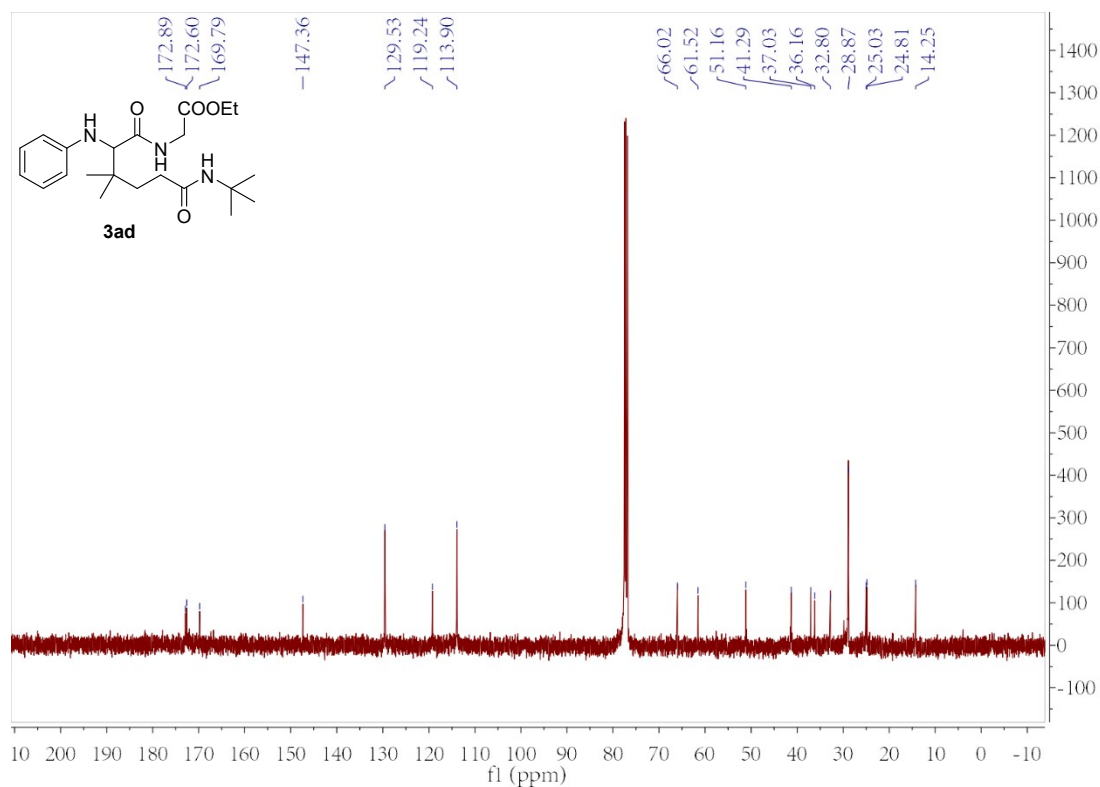

$^1\text{H}$  NMR and  $^{13}\text{C}$  NMR spectra for compound **3ae** ( $\text{CDCl}_3$ ).

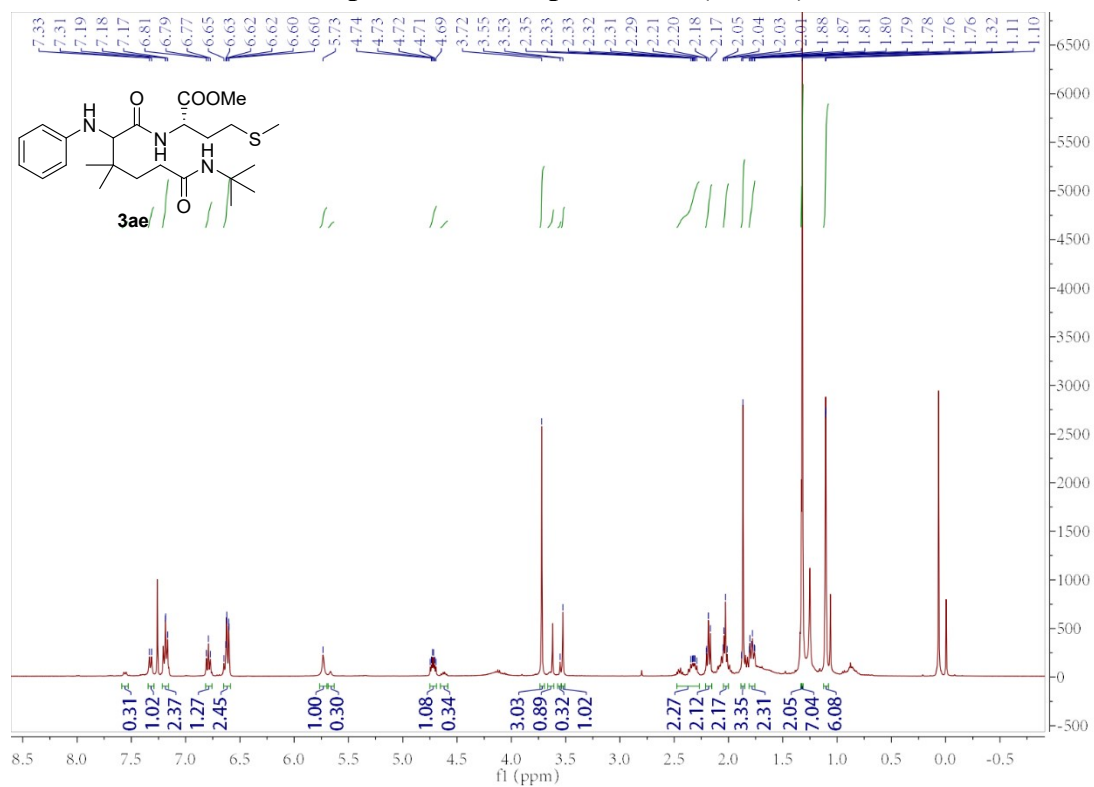

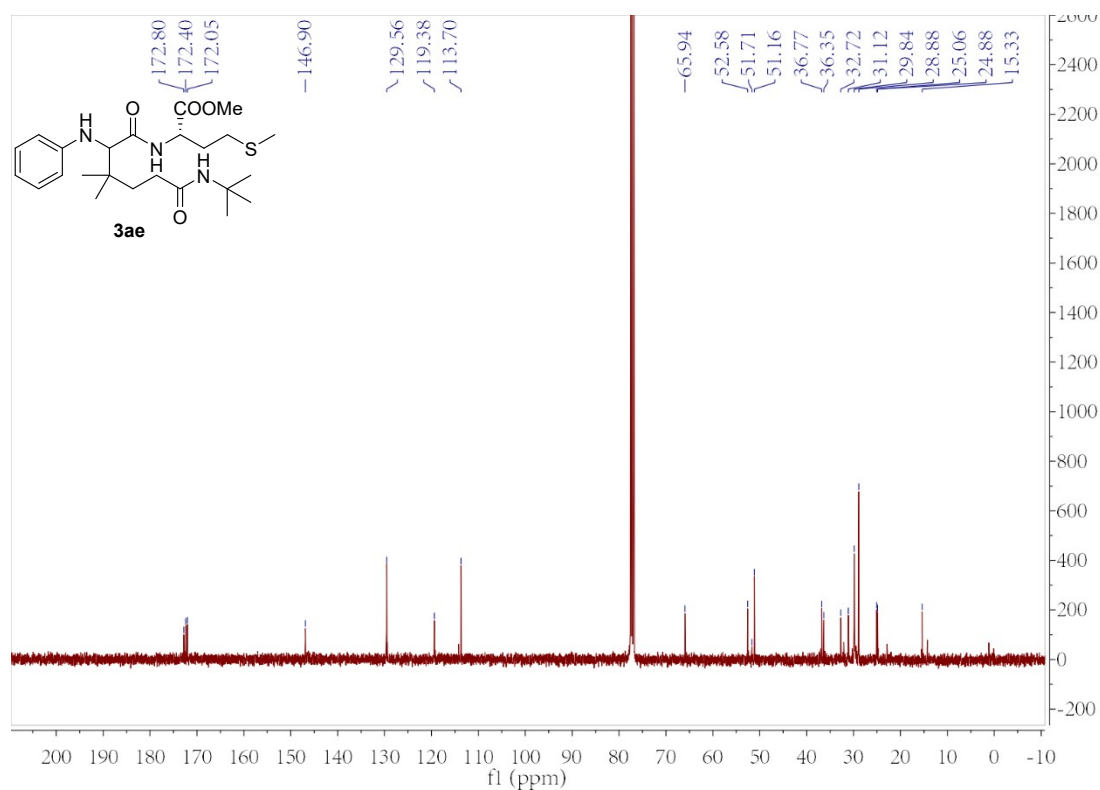

**<sup>1</sup>H NMR and <sup>13</sup>C NMR spectra for compound 3af (CDCl<sub>3</sub>).**

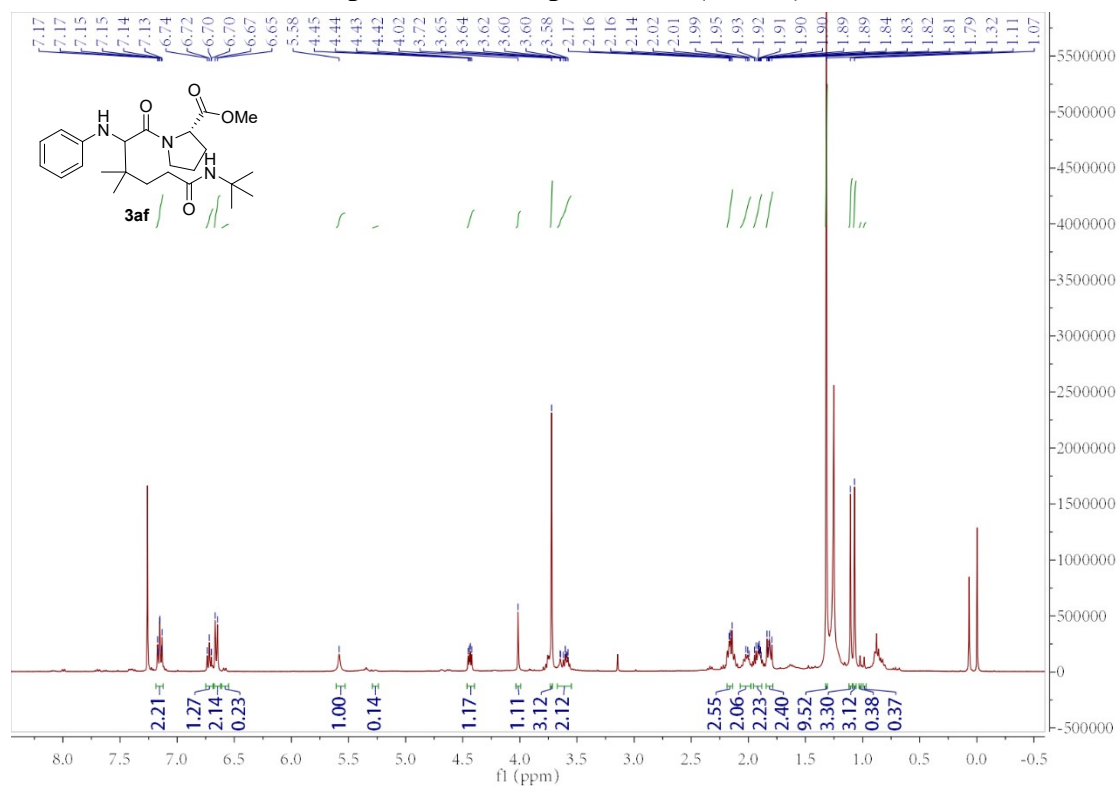

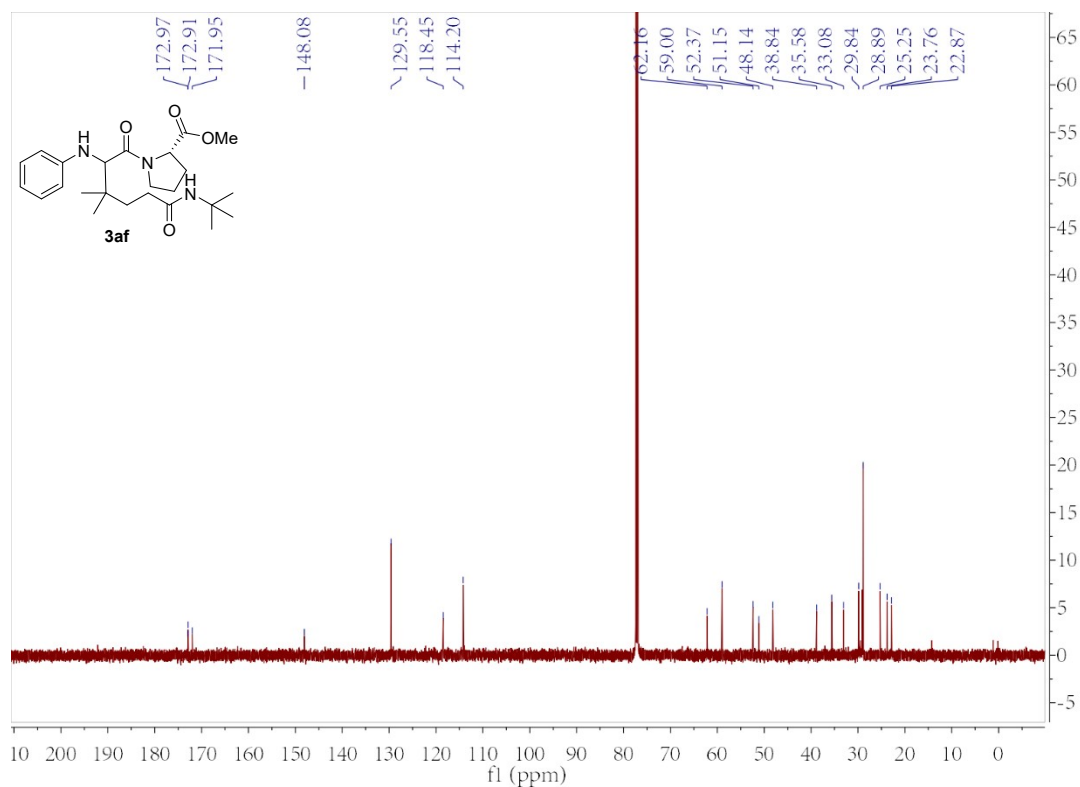

**<sup>1</sup>H NMR and <sup>13</sup>C NMR spectra for compound 4a (CDCl<sub>3</sub>).**

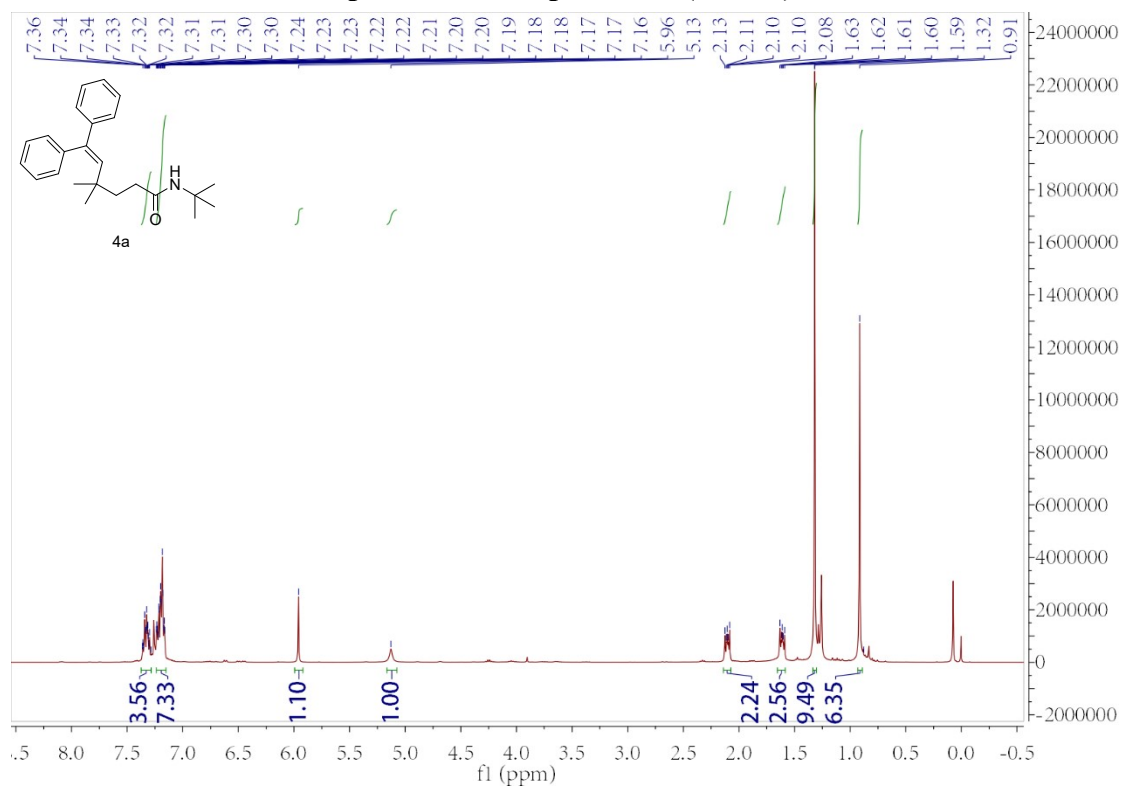



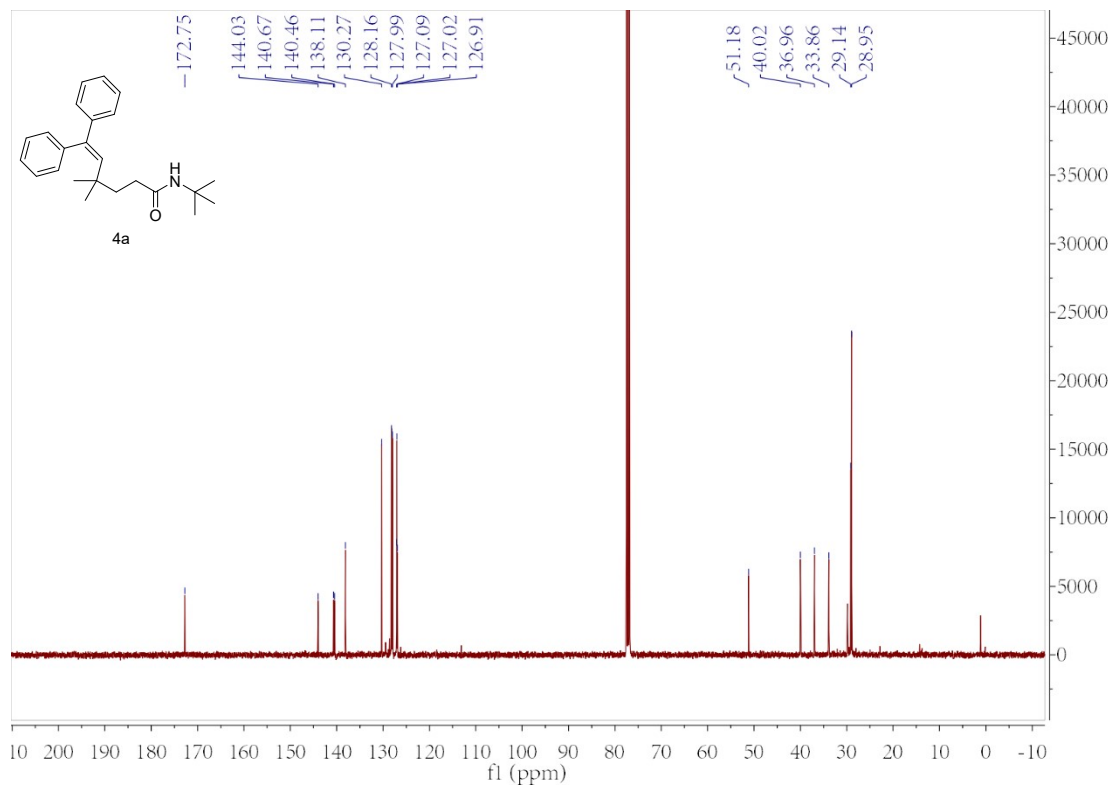

Supplement: d4qo00425f1.pdf [file d4qo00425f1.pdf]
